# Supplementary material for: The HAT TRICK programme for improving physical activity, healthy eating and connectedness among overweight, inactive men: study protocol of a pragmatic feasibility trial
Source: PubMed Central journal article supplement — BMJ Open. 2017 Sep 6;7(9):e016940. doi: 10.1136/bmjopen-2017-016940 (PMC5588940; doi:10.1136/bmjopen-2017-016940), 2017-09-06
Supplement: bmjopen-2017-016940.draft_revisions.pdf [file bmjopen-2017-016940.draft_revisions.pdf]

# BMJ Open

BMJ Open is committed to open peer review. As part of this commitment we make the peer review history of every article we publish publicly available.

When an article is published we post the peer reviewers' comments and the authors' responses online. We also post the versions of the paper that were used during peer review. These are the versions that the peer review comments apply to.

The versions of the paper that follow are the versions that were submitted during the peer review process. They are not the versions of record or the final published versions. They should not be cited or distributed as the published version of this manuscript.

BMJ Open is an open access journal and the full, final, typeset and author-corrected version of record of the manuscript is available on our site with no access controls, subscription charges or pay-per-view fees (<http://bmjopen.bmj.com>).

If you have any questions on BMJ Open's open peer review process please email [info.bmjopen@bmj.com](mailto:info.bmjopen@bmj.com)

# BMJ Open

## The HAT TRICK program for improving physical activity, healthy eating and connectedness among overweight, inactive men: Study protocol of a pragmatic feasibility trial

|                                 |                                                                                                                                                                                                                                                                                                                                                                                                                                                                                                                    |
|---------------------------------|--------------------------------------------------------------------------------------------------------------------------------------------------------------------------------------------------------------------------------------------------------------------------------------------------------------------------------------------------------------------------------------------------------------------------------------------------------------------------------------------------------------------|
| Journal:                        | <i>BMJ Open</i>                                                                                                                                                                                                                                                                                                                                                                                                                                                                                                    |
| Manuscript ID                   | bmjopen-2017-016940                                                                                                                                                                                                                                                                                                                                                                                                                                                                                                |
| Article Type:                   | Protocol                                                                                                                                                                                                                                                                                                                                                                                                                                                                                                           |
| Date Submitted by the Author:   | 20-Mar-2017                                                                                                                                                                                                                                                                                                                                                                                                                                                                                                        |
| Complete List of Authors:       | Caperchione, Cristina; University of British Columbia, School of Health and Exercise Sciences<br>Bottorff, Joan; University of British Columbia Okanagan,<br>Olfiffe, John; University of British Columbia<br>Johnson, Steven; Athabasca University,<br>Hunt, Kate; University of Glasgow<br>Sharp, Paul; University of British Columbia,<br>Fitzpatrick, Kayla; University of British Columbia Okanagan<br>Price, Ryley; University of British Columbia Okanagan<br>Goldenberg, S; University of British Columbia |
| <b>Primary Subject Heading</b>: | Public health                                                                                                                                                                                                                                                                                                                                                                                                                                                                                                      |
| Secondary Subject Heading:      | Sports and exercise medicine, Public health                                                                                                                                                                                                                                                                                                                                                                                                                                                                        |
| Keywords:                       | Men's health, masculinity, physical activity, dietary behaviors, social connectedness, overweight/obese                                                                                                                                                                                                                                                                                                                                                                                                            |
|                                 |                                                                                                                                                                                                                                                                                                                                                                                                                                                                                                                    |

SCHOLARONE™  
Manuscripts

1  
2  
3 1 **The HAT TRICK program for improving physical activity, healthy eating and**  
4  
5  
6 2 **connectedness among overweight, inactive men: Study protocol of a pragmatic**  
7  
8  
9 3 **feasibility trial**  
10  
11  
12 4

13  
14 5 **Authors:** Cristina M. Caperchione<sup>1, 2\*</sup>, Joan L. Bottorff<sup>2, 3</sup>, John L. Oliffe<sup>4</sup>, Steven T. Johnson<sup>5</sup>,  
15  
16  
17 6 Kate Hunt<sup>6</sup>, Paul Sharp<sup>1</sup>, Kayla M. Fitzpatrick<sup>1</sup>, Ryley Price<sup>1</sup>, S. Larry Goldenberg<sup>7</sup>  
18  
19  
20 7

21  
22 8 **Author Affiliations:**  
23

24 9 <sup>1</sup>School of Health and Exercise Sciences, University of British Columbia, Kelowna, BC, Canada  
25  
26

27 10 <sup>2</sup>Institute for Healthy Living and Chronic Disease Prevention, University of British Columbia,  
28  
29  
30 11 Kelowna, BC, Canada  
31

32 12 <sup>3</sup>School of Nursing, University of British Columbia, Kelowna, BC, Canada  
33  
34

35 13 <sup>4</sup>School of Nursing, University of British Columbia, Vancouver, BC, Canada  
36  
37

38 14 <sup>5</sup>Faculty of Health Disciplines, Athabasca University, Edmonton, AB, Canada  
39

40 15 <sup>6</sup>MRC/CSO Social and Public Health Sciences Unit, University of Glasgow, Glasgow, UK  
41  
42

43 16 <sup>7</sup>Canadian Men's Health Foundation and Faculty of Medicine, University of British Columbia,  
44  
45 17 Vancouver, BC, Canada  
46  
47

48 18

49 19 \*Corresponding author  
50  
51

52 20

53  
54  
55 21 **Email Addresses:**  
56

57 22 \*CMC: [cristina.caperchione@ubc.ca](mailto:cristina.caperchione@ubc.ca)  
58  
59  
60

1  
2  
3 23 JLB: [joan.bottorff@ubc.ca](mailto:joan.bottorff@ubc.ca)  
4  
5  
6 24 JLO: [john.oliffe@nursing.ubc.ca](mailto:john.oliffe@nursing.ubc.ca)  
7  
8  
9 25 STJ: [sjohnson@athabascau.ca](mailto:sjohnson@athabascau.ca)  
10  
11 26 KH: [kate.hunt@glasgow.ac.uk](mailto:kate.hunt@glasgow.ac.uk)  
12  
13  
14 27 PS: [paul.sharp@ubc.ca](mailto:paul.sharp@ubc.ca)  
15  
16 28 KF: [kaylafitzpatrick@hotmail.ca](mailto:kaylafitzpatrick@hotmail.ca)  
17  
18  
19 29 RP: [ryleyprice4@gmail.com](mailto:ryleyprice4@gmail.com)  
20  
21 30 SLG: [l.gold@ubc.ca](mailto:l.gold@ubc.ca)  
22  
23  
24 31  
25  
26 32  
27  
28 33  
29  
30  
31 34  
32  
33 35  
34  
35  
36 36  
37  
38 37  
39  
40  
41 38  
42  
43 39  
44  
45  
46 40  
47  
48 41  
49  
50  
51 42  
52  
53  
54 43  
55  
56  
57  
58  
59  
60

44 **ABSTRACT**

45 **Introduction:** Physical activity, healthy eating, and maintaining a healthy weight are associated  
46 with reduced risk of cardiovascular disease, type 2 diabetes and cancer, and improved mental  
47 health. Despite these benefits, many men do not meet recommended physical activity  
48 guidelines and have poor eating behaviors. Many health promotion programs hold little 'manly'  
49 appeal and consequently fail to influence men's self-health practices. Research has revealed  
50 that consideration of 'place' and 'product' that aligns with men's values and interests can  
51 advance health promotion behaviors. HAT TRICK was designed as a 12-week face-to-face,  
52 gender-sensitized intervention for overweight and inactive men focusing on physical activity,  
53 healthy eating and social connectedness, and delivered in collaboration with a major junior  
54 Canadian ice hockey team. The program was implemented and evaluated to assess its  
55 feasibility. This article describes the intervention design and study protocol examining feasibility  
56 and estimated intervention effectiveness of HAT TRICK.

57 **Methods and Analysis:** HAT TRICK participants (N=60) will be men  $\geq 35$  years, residing in the  
58 Okanagan Region of British Columbia, who accumulate  $< 150$ mins of moderate to vigorous  
59 physical activity a week, with a Body Mass Index  $> 25 \text{ kg/m}^2$  and a pant waist size of  $> 38$ ". Each  
60 90-minute weekly session will include targeted health education and theory-guided behavior  
61 change techniques, as well as a progressive group physical activity component. Outcome  
62 measures will be collected at baseline, 12-weeks, and 9-months and include: anthropometrics  
63 physical activity, diet, smoking, alcohol consumption, sleep habits, risk of depression, health-  
64 related quality of life, and social connectedness. Program feasibility and acceptability data (e.g.,  
65 satisfaction, adherence, delivery) will be assessed at 12-weeks.

1  
2  
3 66 **Ethics and Dissemination:** Ethical approval was obtained from the University of British  
4  
5  
6 67 Columbia Okanagan Behavioural Research Ethics Board (#H1600736). Study findings will be  
7  
8 68 disseminated widely through academic meetings, peer reviewed publication, web-based  
9  
10 69 podcasts, social media, plain language summaries and co-delivered community presentations.  
11  
12  
13  
14 70

15  
16 71 **Keywords:** Men's health; masculinity; physical activity; dietary behaviors; overweight/obese;  
17  
18 72 social connectedness; community partnerships; feasibility trial  
19  
20  
21 73

22  
23 74 **Trial Registration:** ISRCTN43361357, Registered August 3, 2016  
24  
25  
26 75  
27

28 76 **Strengths and Limitations of the Study:**

- 29  
30  
31 77 • HAT TRICK is a gender-sensitized program designed to engage 'hard to reach' men with  
32  
33 78 their health by resonating with and appealing to masculine ideals.  
34  
35  
36 79 • The HAT TRICK program has the potential to be transferred across a number of male  
37  
38 80 populations and settings, thus further increasing its reach to a large proportion of men.  
39  
40  
41 81 • This study has a robust evaluation plan, utilizing objective and subjective measures of  
42  
43 82 physical activity, and a variety of measures to assess program feasibility.  
44  
45  
46 83 • Given the exploratory nature of this feasibility study, it is limited in examining causal  
47  
48 84 effect in terms of behavior change.  
49  
50

51 85

52 86

53 87

54 88

55 89

56 90

57 91

58 92

59 93

60 94

## 88 INTRODUCTION

89 Engaging in healthy lifestyle behaviors including physical activity (PA) and healthy eating  
90 to achieve and maintain a healthy body weight, can reduce the risk for developing chronic  
91 diseases such as cardiovascular disease, cancer, type 2 diabetes, depression and premature  
92 mortality [1-4]. Despite the benefits associated with these lifestyle behaviors, a large  
93 proportion of men do not meet the recommended PA guidelines [3, 5] (i.e., at least 150  
94 minutes of moderate to vigorous intensity PA per week) and have poor eating behaviors [6, 7].  
95 Accordingly, the prevalence of overweight and obesity among men is on the rise and continues  
96 to grow at a disproportionate rate to their female counterparts [8]. Complicating matters is the  
97 fact that many men have proved reluctant and/or 'hard-to-reach' in healthy lifestyle and weight  
98 management programs, making disease and illness prevention initiatives difficult [9, 10].

99 Traditionally, a central challenge associated with engaging men in taking more active  
100 care in their health was a perception that attention to one's health ran counter to masculine  
101 ideals of strength, self-reliance and independence [11-14]. Men often associate health  
102 promoting practices as feminine, or a sign of weakness, and consequently threatening to their  
103 status in masculine hierarchies [12, 15]. Thus, many men refrain from engaging in health  
104 promotion behaviors, including attending PA, healthy eating, and weight management  
105 programs [16, 17]. However, Pringle et al. [18] suggested that men's apparent detachment from  
106 healthy behaviors is an indication that typical approaches to health are unappealing and/or  
107 irrelevant to their masculine values and virtues. Previous men-centered PA and healthy eating  
108 related research [19-21] has revealed that careful consideration of 'place', along with a tailored  
109 approach that aligns with men's values and interests, can indeed support increases in health

1  
2  
3 110 promoting behaviors [22-24]. This work supports the notion that there is value in providing men  
4  
5  
6 111 with health promotion opportunities in venues where they participate in and/or watch sport  
7  
8  
9 112 and recreational activities [18, 24, 25].

10  
11 113 Recent research has highlighted the potential for professional sports teams/clubs to  
12  
13 114 attract and engage men in healthy lifestyle behaviors [26-28]. Such settings have proved a  
14  
15  
16 115 powerful draw for men due to familiar, comfortable and/or appealing environments which they  
17  
18  
19 116 offer and the socio-cultural connections men often make with particular teams and fellow  
20  
21 117 supporters in terms of loyalty, identity and belonging [24, 26, 29, 30]. Furthermore,  
22  
23 118 professional/elite sport clubs and settings offer a unique opportunity to support men's health  
24  
25  
26 119 because they provide health promoters with a potentially large captive audience of men in an  
27  
28  
29 120 environment that plays to masculine values and virtues [18, 19, 26, 30].

30  
31 121 Within this context, the gender-sensitized HAT TRICK program was designed to engage  
32  
33 122 men with their health by resonating with and appealing to masculine ideals. Its delivery model  
34  
35  
36 123 is founded on the strong collaboration with the Kelowna Rockets Hockey Team, a major junior  
37  
38  
39 124 ice hockey team within the Canadian Hockey League (CHL) [31]. Garnering the social-cultural  
40  
41 125 connections that men often cultivate with particular sports teams can be a 'lynchpin' to  
42  
43  
44 126 engaging men in healthful behaviors in that this approach recognizes the interests and  
45  
46  
47 127 preferences of men, while fostering an environment that promotes a sense of identity,  
48  
49 128 camaraderie and healthy living. The over-arching goal of this study is to examine the feasibility  
50  
51 129 and acceptability of HAT TRICK, and estimate changes in PA behavior, diet, other health related  
52  
53  
54 130 behaviors (e.g., smoking, alcohol consumption, sleep), risk of depression, health related-quality



1  
2  
3 131 of life (HRQoL) and social connectedness. The specific objective of this article is to describe the  
4  
5  
6 132 intervention design and methodological protocols of HAT TRICK.  
7

8 133  
9

## 10 11 134 **METHODS AND ANALYSIS**

### 12 13 14 135 **Objectives**

15  
16 136 The specific objectives of this study are to:

17  
18  
19 137 1) Determine feasibility and acceptability of HAT TRICK, a health promotion program

20  
21 138 focused on PA and healthy eating for inactive, overweight men.

22  
23  
24 139 2) Estimate effectiveness in terms of changes over time in PA, dietary behaviors, weight,

25  
26 140 smoking, alcohol consumption, sleep habits, risk for depression, HRQoL and social

27  
28  
29 141 connectedness.

30  
31 142 3) Utilize findings to refine the program and inform the development of a future large scale

32  
33  
34 143 randomized control trial (RCT).  
35

### 36 144 **Study design**

37  
38  
39 145 This study protocol has been prepared according to Standard Protocol Items:

40  
41 146 Recommendations for Interventional Trials (SPIRIT) [32]. For a completed SPIRIT checklist

42  
43  
44 147 please see Supplementary File 1.  
45

46 148 A quasi-experimental, pre-post test design will be used to evaluate the feasibility and

47  
48  
49 149 acceptability of a men's health promotion program focused on PA, healthy eating, and social

50  
51 150 connectedness. Data collection will occur at baseline, 12-weeks, and 9-months follow-up. The

52  
53  
54 151 study period extends from August 2016 – May 2018. Recruitment will occur in three phases,

55  
56 152 corresponding with the delivery of three 12-week HAT TRICK sessions: Phase 1 recruitment  
57  
58  
59  
60

1  
2  
3 153 period occurred in fall of 2016; phase 2 recruitment period occurred in winter 2017; and, phase  
4  
5  
6 154 3 recruitment will begin in the summer 2017. Figure 1 provides a flow diagram for the HAT  
7  
8  
9 155 TRICK protocol. Figure 2 provides Standard Protocol Items: Recommendations for  
10  
11 156 Interventional Trials (SPIRIT) figure.

### 13 157 **Study population, eligibility and recruitment**

16 158 A total of 60 participants (20 participants x 3 groups) will be recruited for this feasibility  
17  
18 159 trial. This sample size is appropriate for feasibility trials which aim to provide an estimate of the  
19  
20  
21 160 parameters (i.e., identifying/recruiting participants; practicality of delivery, standard deviation  
22  
23 161 of a primary outcome measure to estimate sample size) needed to design and conduct a  
24  
25  
26 162 sufficiently powered RCT [19, 33, 34]. To be eligible for the study, participants must be men  
27  
28 163 over the age of 35 years, reside in the Okanagan Region of British Columbia (BC), Canada,  
29  
30  
31 164 accumulate less than 150 minutes of PA per week, have a body mass index (BMI) of over  
32  
33 165 25kg/m<sup>2</sup> and a pant waist size of 38" or greater.

36 166 A variety of recruitment strategies will be utilized, including: 1) communication avenues  
37  
38 167 via the Kelowna Rockets Hockey Team (e.g., poster advertising at home games, Rockets  
39  
40  
41 168 website, newsletters to season tickets holders, game day intercom announcements,  
42  
43 169 recruitment/information booth at home games); 2) local media, including print newspaper and  
44  
45  
46 170 television and radio broadcasts; 3) email and print communication via local male dominated  
47  
48 171 community organizations (e.g., Okanagan Men's Shed); 4) social media, including Facebook,  
49  
50  
51 172 Castanet, Kijiji, and Kelowna Now (community events website); and 5) Poster advertisements at  
52  
53 173 local community centers, ice hockey arenas, coffee shops, pubs and bars, and large hardware  
54  
55  
56 174 and automotive commercial entities (e.g., Canadian Tire). Prior to groups 2 and 3, word of  
57  
58  
59  
60

1  
2  
3 175 mouth may be an additional recruitment strategy. Lastly, a project specific website  
4  
5  
6 176 ([www.hattrick.ok.ubc.ca](http://www.hattrick.ok.ubc.ca)) with additional information about the program, including eligibility  
7  
8 177 criteria and how to sign up, will also be used to recruit participants.  
9

10 178 Interested individuals will be encouraged to contact the research team to confirm their  
11  
12 179 eligibility. Those confirmed eligible will be asked to complete a Physical Activity Readiness  
13  
14 180 Questionnaire (PAR-Q+) [35], a medical screening tool which has been recommended for use in  
15  
16 181 exercise related interventions and RCTs [36]. All completed PAR-Q+ will be reviewed by a  
17  
18 182 Certified Exercise Physiologist [37] and individuals who require further medical screening will be  
19  
20 183 informed and invited to gain medical clearance from a general medical practitioner (i.e., family  
21  
22 184 doctor) in order to participate in the study. Individuals will be accepted on a ‘first come first  
23  
24 185 serve’ basis with additional individuals being placed on a waitlist and contact list for the next  
25  
26 186 available session.  
27  
28  
29  
30  
31  
32

### 33 187 **HAT TRICK Intervention**

34  
35  
36 188 HAT TRICK focuses on three goals including enhancing PA, healthy eating, and social  
37  
38 189 connectedness. The program is tailored for men using evidence-based research [24, 38, 39] and  
39  
40 190 is informed by theoretical underpinnings associated with behavior change [40-42] and  
41  
42 191 masculinities [11, 12, 14]. Gender-related factors influencing men’s health behaviors and health  
43  
44 192 promotion were considered throughout the design of the program. All resources were  
45  
46 193 consistent with a masculine look and feel, and provided clear, positive, and direct messaging  
47  
48 194 around PA, healthy eating, and social connectedness [38, 43].  
49  
50  
51  
52

53 195 HAT TRICK consists of 12 weekly, 90-minute face-to-face group sessions delivered at the  
54  
55 196 local hockey arena, the home facility to the Kelowna Rockets. Each group session includes a  
56  
57  
58  
59  
60

1  
2  
3 197 'locker room' component with an ice hockey related-theme used to frame health-related  
4  
5  
6 198 education and information regarding PA, healthy eating and behavior change techniques (i.e.,  
7  
8  
9 199 goal setting, self-monitoring, social support), whilst simultaneously promoting enjoyment and  
10  
11 200 increased social connectedness through an interactive and informal style of learning. For  
12  
13 201 instance, to enhance social connectedness, facilitators will aim to foster a sense of teamwork  
14  
15  
16 202 and comradery among the men through group activities and competition. Men will be  
17  
18 203 encouraged to share contact information and meet outside of the program as well as foster  
19  
20  
21 204 friendly competition by challenging each other meet their physical activity and healthy eating  
22  
23 205 goals. Participants are introduced to a variety of activities and guided through a progressive PA  
24  
25  
26 206 program within the facility. Weekly PA and healthy eating challenges are introduced to  
27  
28 207 supplement the education to encourage men to integrate what they learned to their daily life  
29  
30  
31 208 [44-46]. Table 1 provides a detailed description of the weekly locker room content, PA, and  
32  
33 209 challenges provided to the men.

34  
35  
36 210 **Table 1.** Weekly Outline of HAT TRICK

| Locker Room Education                                                                                                                                                    | Group PA                                                                                                                                                                                                                                                                                                                                             | Weekly Challenge                                                                                                                                                                             |
|--------------------------------------------------------------------------------------------------------------------------------------------------------------------------|------------------------------------------------------------------------------------------------------------------------------------------------------------------------------------------------------------------------------------------------------------------------------------------------------------------------------------------------------|----------------------------------------------------------------------------------------------------------------------------------------------------------------------------------------------|
| Week 1: Pre Game                                                                                                                                                         |                                                                                                                                                                                                                                                                                                                                                      |                                                                                                                                                                                              |
| <ul style="list-style-type: none"> <li>• Program introduction</li> <li>• Why HAT TRICK?</li> <li>• The first step</li> <li>• Take stock of current activities</li> </ul> | <ul style="list-style-type: none"> <li>• Introduction to Fitbits</li> <li>• Hockey area facility tour</li> <li>• Intermission               <ul style="list-style-type: none"> <li>○ Meet and greet with hockey team</li> </ul> </li> </ul>                                                                                                          | On every day this week: <ul style="list-style-type: none"> <li>• Record how many steps you do</li> <li>• Record everything that you eat and drink</li> </ul>                                 |
| Week 2: Face Off                                                                                                                                                         |                                                                                                                                                                                                                                                                                                                                                      |                                                                                                                                                                                              |
| <ul style="list-style-type: none"> <li>• Change a bit</li> <li>• Break the cycle</li> <li>• Top 5 tips for success</li> </ul>                                            | <ul style="list-style-type: none"> <li>• Activities around hockey arena               <ul style="list-style-type: none"> <li>○ Climb bleachers, walk the loop, seat dips</li> </ul> </li> <li>• Intermission               <ul style="list-style-type: none"> <li>○ Fitbit usage and barriers</li> <li>○ Step recommendations</li> </ul> </li> </ul> | On at least <b>3</b> days of the week: <ul style="list-style-type: none"> <li>• walk an extra 1,500 steps (from baseline value)</li> <li>• Choose water instead of a sugary drink</li> </ul> |
| Week 3: Power Play                                                                                                                                                       |                                                                                                                                                                                                                                                                                                                                                      |                                                                                                                                                                                              |
| <ul style="list-style-type: none"> <li>• HAT TRICK to healthy eating:</li> </ul>                                                                                         | <ul style="list-style-type: none"> <li>• Hockey team training gym</li> </ul>                                                                                                                                                                                                                                                                         | On at least <b>3</b> days of the week:                                                                                                                                                       |

|                                                                                                                                                                                                                                    |                                                                                                                                                                                                                                                                                                                       |                                                                                                                                                                                                          |
|------------------------------------------------------------------------------------------------------------------------------------------------------------------------------------------------------------------------------------|-----------------------------------------------------------------------------------------------------------------------------------------------------------------------------------------------------------------------------------------------------------------------------------------------------------------------|----------------------------------------------------------------------------------------------------------------------------------------------------------------------------------------------------------|
| <ul style="list-style-type: none"> <li>carbs, proteins, and fats</li> <li>• Top 6 healthy eating tips</li> <li>• Power food swaps</li> </ul>                                                                                       | <ul style="list-style-type: none"> <li>○ Fundamental activities with Athletic Trainer</li> <li>○ Circuit-style workout</li> <li>• Intermission</li> <li>○ Discuss week 2 challenge</li> </ul>                                                                                                                         | <ul style="list-style-type: none"> <li>• walk an extra 1,500 steps (from baseline value)</li> <li>• Start your morning with a healthy breakfast</li> </ul>                                               |
| Week 4: Tic Tac Toe                                                                                                                                                                                                                |                                                                                                                                                                                                                                                                                                                       |                                                                                                                                                                                                          |
| <ul style="list-style-type: none"> <li>• Size: Then and now</li> <li>• Handy portion guide</li> <li>• Top 7 tips for dining out</li> <li>• Rethink beer o'clock</li> <li>• Top 6 tips for keeping the beer gut in check</li> </ul> | <ul style="list-style-type: none"> <li>• Ball hockey game <ul style="list-style-type: none"> <li>○ Two periods of 15 minutes</li> </ul> </li> <li>• Intermission: <ul style="list-style-type: none"> <li>○ Discuss week 3 challenge</li> </ul> </li> </ul>                                                            | <p>On at least <b>5</b> days of the week:</p> <ul style="list-style-type: none"> <li>• walk an extra 1,500 steps (from baseline value)</li> <li>• Use the handy portion guide to plan a meal</li> </ul>  |
| Week 5: Long Change                                                                                                                                                                                                                |                                                                                                                                                                                                                                                                                                                       |                                                                                                                                                                                                          |
| <ul style="list-style-type: none"> <li>• Active living 101</li> <li>• HAT TRICK to active living</li> <li>• Canada PA Guidelines</li> <li>• Recruit a deep bench</li> </ul>                                                        | <ul style="list-style-type: none"> <li>• Hockey team training gym <ul style="list-style-type: none"> <li>○ Fundamental activities with Athletic Trainer</li> <li>○ Circuit-style workout</li> </ul> </li> <li>• Intermission <ul style="list-style-type: none"> <li>○ Discuss week 4 challenge</li> </ul> </li> </ul> | <p>On at least <b>5</b> days of the week:</p> <ul style="list-style-type: none"> <li>• walk an extra 1,500 steps (from baseline value)</li> <li>• Choose water instead of a sugary drink</li> </ul>      |
| Week 6: Neutral Zone                                                                                                                                                                                                               |                                                                                                                                                                                                                                                                                                                       |                                                                                                                                                                                                          |
| <ul style="list-style-type: none"> <li>• Energy balance</li> <li>• The 80/20 rule</li> <li>• Top 8 keys to weight loss</li> <li>• Drink wisely</li> </ul>                                                                          | <ul style="list-style-type: none"> <li>• Exercise at a moderate intensity (3 bouts of 15 minutes)- Include short intervals of higher intensity</li> <li>• Intermission: <ul style="list-style-type: none"> <li>○ Discuss week 5 challenge</li> </ul> </li> </ul>                                                      | <p>On at least <b>3</b> days of the week:</p> <ul style="list-style-type: none"> <li>• walk an extra 3,000 steps (from baseline value)</li> <li>• Apply the 80/20 rule</li> </ul>                        |
| Week 7: Penalty Kill                                                                                                                                                                                                               |                                                                                                                                                                                                                                                                                                                       |                                                                                                                                                                                                          |
| <ul style="list-style-type: none"> <li>• SMART goals</li> <li>• Keep your stick on the ice</li> <li>• Top 6 relapse prevention strategies</li> <li>• Top 6 healthy snacking tips</li> <li>• Rewarding yourself</li> </ul>          | <ul style="list-style-type: none"> <li>• "Boot camp" style workout</li> <li>• Intermission: <ul style="list-style-type: none"> <li>○ Discuss week 6 challenge</li> </ul> </li> </ul>                                                                                                                                  | <p>On at least <b>3</b> days of the week:</p> <ul style="list-style-type: none"> <li>• walk an extra 3,000 steps (from baseline value)</li> <li>• Choose healthy snacks options</li> </ul>               |
| Week 8: Odd Man Rush                                                                                                                                                                                                               |                                                                                                                                                                                                                                                                                                                       |                                                                                                                                                                                                          |
| <ul style="list-style-type: none"> <li>• Principles of strength training</li> <li>• Circuit training</li> <li>• At home workout</li> <li>• Turning up the heat</li> </ul>                                                          | <ul style="list-style-type: none"> <li>• Introduction to at-home bodyweight workout</li> <li>• Intermission: <ul style="list-style-type: none"> <li>○ Discuss week 7 challenge</li> </ul> </li> </ul>                                                                                                                 | <p>On at least <b>5</b> days of the week:</p> <ul style="list-style-type: none"> <li>• walk an extra 3,000 steps (from baseline value)</li> <li>• Start your morning with a healthy breakfast</li> </ul> |
| Week 9: Icing                                                                                                                                                                                                                      |                                                                                                                                                                                                                                                                                                                       |                                                                                                                                                                                                          |
| <ul style="list-style-type: none"> <li>• Top 5 tips for "brocery" shopping</li> <li>• Reading the fine print</li> <li>• The many names for sugar and salt</li> <li>• Product buzz words</li> </ul>                                 | <ul style="list-style-type: none"> <li>• Exercise at moderate-vigorous intensity (3 bouts of 15 minutes)-15 minutes will include high intensity training (HIT)</li> <li>• Intermission:</li> </ul>                                                                                                                    | <p>On at least <b>5</b> days of the week:</p> <ul style="list-style-type: none"> <li>• walk an extra 3,000 steps (from baseline value)</li> <li>• Apply the 80/20 rule</li> </ul>                        |

|                                                                                                                                       |                                                                                                                                                                                                                                                                                               |                                                                                                                                                                                                  |
|---------------------------------------------------------------------------------------------------------------------------------------|-----------------------------------------------------------------------------------------------------------------------------------------------------------------------------------------------------------------------------------------------------------------------------------------------|--------------------------------------------------------------------------------------------------------------------------------------------------------------------------------------------------|
|                                                                                                                                       | ○ Discuss week 8 challenge                                                                                                                                                                                                                                                                    |                                                                                                                                                                                                  |
| Week 10: Fast Break                                                                                                                   |                                                                                                                                                                                                                                                                                               |                                                                                                                                                                                                  |
| <ul style="list-style-type: none"> <li>• Making healthy trades</li> <li>• The BBQ king</li> <li>• Meals on the fly</li> </ul>         | <ul style="list-style-type: none"> <li>• Sport chosen by men (3 periods of 15 minutes)</li> <li>• Intermission: <ul style="list-style-type: none"> <li>○ Discuss week 9 challenge</li> </ul> </li> </ul>                                                                                      | On at least <b>5</b> days of the week: <ul style="list-style-type: none"> <li>• walk an extra 3,000 steps (from baseline value)</li> <li>• Choose healthy snacks options</li> </ul>              |
| Week 11: Set Play                                                                                                                     |                                                                                                                                                                                                                                                                                               |                                                                                                                                                                                                  |
| <ul style="list-style-type: none"> <li>• Sit less</li> <li>• Top 4 stress management tips</li> <li>• Sleep and health</li> </ul>      | <ul style="list-style-type: none"> <li>• Resistance training session</li> <li>• Intermission: <ul style="list-style-type: none"> <li>○ Discuss week 10 challenge</li> </ul> </li> </ul>                                                                                                       | On at least <b>5</b> days of the week: <ul style="list-style-type: none"> <li>• walk an extra 3,000 steps (from baseline value)</li> <li>• Use the handy portion guide to plan a meal</li> </ul> |
| Week 12: He shoots, he scores!                                                                                                        |                                                                                                                                                                                                                                                                                               |                                                                                                                                                                                                  |
| <ul style="list-style-type: none"> <li>• Highlight reel</li> <li>• Dealing with set-backs</li> <li>• What's the next step?</li> </ul> | <ul style="list-style-type: none"> <li>• Family skate and BBQ <ul style="list-style-type: none"> <li>○ Family and friends</li> <li>○ Man of the Match (awards)</li> </ul> </li> <li>• Intermission: <ul style="list-style-type: none"> <li>○ Discuss week 11 challenge</li> </ul> </li> </ul> | Be HAT TRICK healthy. Keep working towards your goals and making small lifestyle changes.                                                                                                        |

211

212 In these initial deliveries, HAT TRICK will be facilitated by research personnel trained in

213 health promotion and behavior change techniques. However, it is anticipated that for future

214 delivery of the program, external facilitators (e.g., community health promotion 'champions',

215 individuals who have previously gone through the program) will be trained to deliver the

216 program. In addition, hockey team personnel and community experts will be invited as guest

217 speakers/presenters for selected sessions. For example, the Rockets Athletic Therapist will be

218 brought in to lead a strength training session and the Rockets nutritionist specialist will be a

219 guest presenter for some of the nutrition education sessions. Community health professionals

220 will also be involved in leading some of the group sessions. For instance, qualified local fitness

221 professionals will lead the men through a circuit training session and martial arts type

222 workouts, and a local Chef may also assist with presenting and discussing healthier food options

1  
2  
3 223 when ordering from restaurant menus. Including team 'insiders' and local professionals (i.e.,  
4  
5  
6 224 Rockets personnel) provides a variety of content and activities for the men, potentially helping  
7  
8  
9 225 to build community capacity and buy-in, which will be vital to future dissemination and  
10  
11 226 sustainability.

12  
13 227 All participants will be provided with the HAT TRICK 'Playbook', a print resource manual  
14  
15  
16 228 that further summarizes the key messages and signposts the resources to draw on over 12-  
17  
18 229 week program. The 'Playbook' is divided into 12 weeks and corresponds with each weekly  
19  
20  
21 230 theme of HAT TRICK, as outlined in Table 1. It contains educational information, expressed in  
22  
23 231 simple terms using hockey-related metaphors, concerning healthy eating (i.e., information  
24  
25  
26 232 about macro-nutrients, portion sizes, etc.) and active living (i.e., barriers and benefits to PA,  
27  
28 233 being active at home, etc.), as well as strategies for weight management and behavior change,  
29  
30  
31 234 such as information concerning social support, self-monitoring, goal setting, and relapse  
32  
33 235 prevention. To assist with self-monitoring, participants will be provided with a Fitbit Charge  
34  
35  
36 236 HR™ and PA and dietary tracking logs which are embedded in the 'Playbook'. During each week  
37  
38 237 of the program, men will be encouraged and challenged to increase their step count (in  
39  
40  
41 238 graduate increments) and non-walking PA, as well as to engage in healthy eating (e.g.,  
42  
43 239 increasing fruit and vegetable consumption) and record these activities in their 'Playbook'  
44  
45  
46 240 tracking logs.

#### 47 48 241 **Outcome Measures**

49  
50  
51 242 Quantitative and qualitative data collection methods will be used to assess outcome  
52  
53 243 and feasibility measures. All assessments will take place at the same facility where HAT TRICK  
54  
55  
56 244 will be delivered and occur at baseline (one week prior to the start of the program), at 12-  
57  
58  
59  
60

245 weeks (completion of the program) and at 9-months follow-up (post-baseline). Participants that  
 246 are unable to attend the measurement session will be invited to complete measures at an  
 247 agreed upon time in the Physical Health and Activity Behaviour Lab at the University of British  
 248 Columbia or at an alternative location such as their home. All measures are described in further  
 249 detail below. In addition, Table 2 provides a summary of measures and data collection time  
 250 points.

251 **Table 2.** Summary of measures and data collection time points

| Measures                              | Methods for data collection                                                   | Data collection time points |
|---------------------------------------|-------------------------------------------------------------------------------|-----------------------------|
| Demographics                          | Age, ethnicity, education, occupation, income, marital status, co-morbidities | 0 (Baseline only)           |
| Anthropometrics                       | Height, weight, blood pressure, heart rate, waist circumference               | 0, 12-wks and 9-mths        |
| PA levels                             | Actigraph GT3X™ accelerometer (over a 7 day-period)                           | 0, 12-wks and 9-mths        |
|                                       | Godin's Leisure Time Exercise Questionnaire (GLTEQ)                           | 0, 12-wks and 9-mths        |
| Sedentary behavior                    | Actigraph GT3X™ accelerometer (over a 7 day-period)                           | 0, 12-wks and 9-mths        |
|                                       | Marshall Sitting Questionnaire (MSQ)                                          | 0, 12-wks and 9-mths        |
| Dietary behavior                      | The Dietary Instrument for Nutrition Education Questionnaire (DINE)           | 0, 12-wks and 9-mths        |
| Other health behaviors                | 7 Day Alcohol Recall                                                          | 0, 12-wks and 9-mths        |
|                                       | Smoking and tobacco use                                                       | 0, 12-wks and 9-mths        |
|                                       | Sleep habits                                                                  | 0, 12-wks and 9-mths        |
| Psychological and physical well-being | SF-12V2 Health Survey                                                         | 0, 12-wks and 9-mths        |



1  
2  
3  
4  
5  
6  
7  
8  
9  
10  
11  
12  
13  
14  
15  
16  
17  
18  
19  
20  
21  
22  
23  
24  
25  
26  
27  
28  
29  
30  
31  
32  
33  
34  
35  
36  
37  
38  
39  
40  
41  
42  
43  
44  
45  
46  
47  
48  
49  
50  
51  
52  
53  
54  
55  
56  
57  
58  
59  
60

|  |                                      |                      |
|--|--------------------------------------|----------------------|
|  | Male Depression Risk Scale (MDRS-22) | 0, 12-wks and 9-mths |
|--|--------------------------------------|----------------------|

|  |                                                 |                      |
|--|-------------------------------------------------|----------------------|
|  | Abbreviated Duke Social Support Index (DSSI-11) | 0, 12-wks and 9-mths |
|--|-------------------------------------------------|----------------------|

|                                    |                                          |                                 |
|------------------------------------|------------------------------------------|---------------------------------|
| Program satisfaction/acceptability | Satisfaction/acceptability questionnaire | 12-wks (post intervention only) |
|------------------------------------|------------------------------------------|---------------------------------|

|  |                                                       |                                 |
|--|-------------------------------------------------------|---------------------------------|
|  | Semi-structured telephone interview with participants | 12-wks (post intervention only) |
|--|-------------------------------------------------------|---------------------------------|

---

252

253 Demographics and anthropometrics

254 As part of the self-report questionnaire, participants will be asked to report

255 demographic variables including; date of birth, ethnic background, level of education, marital

256 status, chronic disease conditions, main activity, occupation, and household income. Height

257 (cm), weight (kg), waist circumference (cm), blood pressure (mmHg), and heart rate (bpm) will

258 be measured by a research team member, trained to a standard protocol, at all assessment

259 sessions. Weight and height will be measured with the participant standing normally, with feet

260 together and head in the Frankfort plane, using Seca 700 mechanical balance scales and a Seca

261 220 measuring rod (Seca GmbH, Hamburg). Using the National Institutes of Health protocol

262 [47], waist circumference will be measured on the transverse plane at the top of the iliac crest

263 using a measurement tape. Blood pressure and heart rate will be measured two times at two

264 minutes intervals with a Life Source Digital Deluxe One Step Blood Pressure Monitor.

265 Participants will be asked to sit quietly for five minutes prior to the first measurement. Blood

266 pressure will be measured on the left arm with forearm on a table, palm of the hand facing up.

267 Participants will be asked to rest the arm comfortably at heart level, sitting with their back

268 against the chair, legs uncrossed.

1  
2  
3 269 Physical Activity  
4

5  
6 270 PA will be assessed objectively using an Actigraph GT3X™ accelerometer (ActiGraph,  
7  
8 271 Pensacola, FL) during all waking hours over seven days. The accelerometers will be initialized to  
9  
10 272 record steps, inclination, and acceleration counts in tri-axial mode, using 60-second epochs [48,  
11  
12 273 49]. Participants will be instructed to wear the accelerometer above their right hip and in-line  
13  
14 274 with their right knee facing up, and to remove it during sleeping hours or for any activities  
15  
16 275 where water may be involved. The Actigraph GT3X™ is considered the ‘gold standard’ measure  
17  
18 276 of PA in adults [50] and has shown validity and reliability compared to other commercial  
19  
20 277 devices [51, 52]. Established cutoff points were used to calculate daily minutes of moderate  
21  
22 278 (2,691 – 6,166 counts/min) and vigorous (>6,167 counts/min) physical activity while controlling  
23  
24 279 for the number of days the accelerometer was worn [51]. Moderate-to-vigorous physical  
25  
26 280 activity (MVPA) will be calculated as a sum score of weekly minutes in MVPA. Data will be  
27  
28 281 included in the analyses if there are no extreme counts (>20,000) and if data are available for at  
29  
30 282 least 600 minutes wear time per day on 5 days. Participants with invalid data will be asked to  
31  
32 283 wear the activity monitor for a further 7 days.  
33  
34  
35  
36  
37  
38  
39  
40

41 284 PA will also assessed by self-report using a modified version of the Godin Leisure Time  
42  
43 285 Exercise Questionnaire (GLTEQ) [53]. Participants will be asked to indicate the frequency and  
44  
45 286 type of intensity (i.e., light, moderate, vigorous) of their daily PA per week and the duration  
46  
47 287 (minutes) of these sessions [53]. All responses will be converted to minutes and calculated in  
48  
49 288 accordance with the metabolic equivalent (MET) minutes method [54]. A cut-off point of  $\geq 600$   
50  
51 289 MET minutes will then be used to dichotomize participants as “adequately active for health  
52  
53  
54  
55  
56  
57  
58  
59  
60

1  
2  
3 290 benefit” or “inadequately active” [54, 55] .The GLTEQ has shown good validity and reliability  
4  
5  
6 291 across a number of populations and settings [56-58].  
7

## 8 292 Sedentary Behavior

9  
10 293 Accelerometers will also be used to objectively assess sedentary behavior using a 30s  
11  
12 294 epoch. Sedentary time will be determined as <100 counts/min, adjusted for non-wear time  
13  
14 295 operationalized as at least 60 minutes of consecutive zeros [49]. In addition, sedentary  
15  
16 296 behaviors will be assessed by self-report using The Marshall Sitting Questionnaire (MSQ) [59].  
17  
18 297 The MSQ assesses time spent sitting on weekdays and weekend days at work, traveling and at  
19  
20  
21 298 home. Data from the sitting time questionnaire will be used to create an estimate of total  
22  
23 299 weekday and weekend-day sitting times (min/day) by summing the time reported in each  
24  
25  
26 300 domain [59]. This measure has demonstrated reliability and validity in the adult population  
27  
28  
29 301 [59].  
30  
31

## 32 302 Dietary Behaviors

33  
34 303 Dietary behaviors will be assessed by the Dietary Instrument for Nutrition Education  
35  
36 304 (DINE) questionnaire [60], a short 19-item questionnaire providing a measure of frequency of  
37  
38 305 intake of different food types (i.e., fruits and vegetables) and macronutrients over the last  
39  
40  
41 306 seven days. Composite scores will be calculated in accordance with the DINE protocol used for  
42  
43  
44 307 total fat intake and total fiber intake , with higher scores indicating greater consumption [60].  
45  
46  
47 308 This validated instrument [60] is considered to be an acceptable alternative to more detailed  
48  
49 309 diet recall questionnaires and food dairies, and has been chosen for this particular study as it  
50  
51  
52 310 focuses on food types (i.e., fruits and vegetables) associated with chronic disease prevention  
53  
54  
55 311 and management [61, 62].  
56  
57  
58  
59  
60

1  
2  
3 312 Other health-related behaviors  
4

5  
6 313 Smoking and tobacco use, alcohol consumption, and sleep habits will be assessed via  
7  
8 314 self-report questions [63]. Smoking status will be measured using a single question, wherein  
9  
10 315 participants identify as a regular smoker (daily), occasional smoker (once in a while), ex-smoker,  
11  
12 316 or non-smoker. Occasional and regular smokers will be asked to report their smoking habits and  
13  
14 317 quit attempts using standardized questions [63].  
15

16  
17  
18 318 Alcohol intake will be measured using a 7-Day Alcohol Recall [64]. Participants are asked  
19  
20 319 to consider the previous 7 days and report the number of pints of beer/cider, glasses of wine,  
21  
22 320 glasses of fortified wine (e.g., Port), measures of spirits, and any other alcoholic beverages  
23  
24 321 consumed each day.  
25

26  
27  
28 322 Participants' sleeping habits will be reported through average hours of sleep on a typical  
29  
30 323 night [65]. Descriptive measures related to speaking with a doctor or health professional about  
31  
32 324 having difficulty sleep and being diagnosed with a sleep disorder will also collected [65].  
33

34  
35  
36 325 Risk of Depression  
37

38  
39 326 Risk of depression will be assessed using the Male Depression Risk Scale (MDRS-22) [66].  
40  
41 327 This is a 22-item Likert scale questionnaire ranging from 0 (not at all) to 7 (almost always).  
42  
43 328 Participants are asked to think back over the last month and respond to each item considering  
44  
45 329 how often it applies. The MDRS-22 provides a total score via the summation of all 22 items and  
46  
47 330 six subscale scores that follow six symptom domains including: emotional suppression, drug  
48  
49 331 use, alcohol use, somatic symptoms, risk taking, and anger and aggression. A higher score  
50  
51 332 indicates a greater risk of depression. The MDRS-22 has demonstrated validity and reliability  
52  
53 333 among men [66, 67].  
54  
55  
56  
57  
58  
59  
60

1  
2  
3 334 Health-related Quality of Life  
4

5  
6 335 HRQoL will be assessed using the Short Form Health Survey (SF-12) [68]. The SF-12 was  
7  
8 336 developed as a shorter alternative to the SF-36 [69], and it includes 12 questions and eight  
9  
10 337 physical and mental health dimension scales including; physical functioning, role-physical,  
11  
12 338 bodily pain, general health, vitality, social function, role-emotional and mental health [68].  
13  
14 339 Scoring for this survey includes pre-coded numeric values that are assigned to each of the eight  
15  
16 340 scales and then scored from 0 to 100, with a higher score indicating better health [70]. The SF-  
17  
18 341 12 is one of the most widely used HRQoL evaluation tools and has been shown to be valid and  
19  
20  
21 342 reliable in a number of populations [71-74].  
22  
23  
24

25  
26 343 Social Support  
27

28 344 The Abbreviated Duke Social Support Index (DSSI-11) [75] will be used to assess  
29  
30 345 perceived social support. The DSSI is an 11-item questionnaire comprising of two sub-scales;  
31  
32 346 social interaction (4 items) and social satisfaction (7 items), measured on a 4 point Likert scale.  
33  
34 347 The social interaction subscale asks questions regarding the number of social interactions an  
35  
36 348 individual has had within the past week (e.g., *How many times during the past week did you*  
37  
38 349 *spend time with someone who does not live with you?* The social satisfaction subscale asks  
39  
40 350 about the subjective quality of these relationships (e.g., *When you are talking with your family*  
41  
42 351 *or friends, do you feel you are being listened to?* The social interaction scale ranges from 4 to 12  
43  
44 352 and the social satisfaction subscale ranges from 6 to 18, thus the total score for the DSSI-11  
45  
46 353 ranges from 10 to 30 (combination of social interactions and social satisfaction scores, with  
47  
48 354 social satisfaction reverse scored before summation) with higher scores indicating a stronger  
49  
50  
51 355 perception of social support [75]. The DSSI-11 has been shown to be valid and reliable in adult  
52  
53  
54  
55  
56  
57  
58  
59  
60

1  
2  
3 356 populations and reported to be useful for measuring social support in community-based  
4  
5  
6 357 epidemiological studies [76-79].  
7

### 8 358 **Statistical Analysis**

9  
10 359 Descriptive analyses will be completed and presented as means and standard deviations  
11  
12 360 for continuous variables and as frequencies and proportions for categorical data. Data analysis  
13  
14 361 of outcome variables including estimates of change in PA, sedentary behavior, dietary  
15  
16 362 behaviors, smoking, smoking, alcohol consumption, sleep habits, risk of depression, HRQoL, and  
17  
18 363 social support will be examined using a within subjects, repeated measures ANOVA. The level  
19  
20  
21 364 of significance ( $\alpha$ ) will be set at 0.05. As the primary outcome is feasibility, it is not appropriate  
22  
23  
24 365 to perform a power calculation. All analyses will be conducted using IBM SPSS statistics 23.  
25  
26  
27

### 28 366 **Program Feasibility and Analysis**

29  
30  
31 367 At 12-weeks (post intervention), all participants will complete a program  
32  
33 368 satisfaction/acceptability questionnaire. Participants will be asked several Likert scale questions  
34  
35 369 as well as open-ended response questions relating to their experience and satisfaction with the  
36  
37 370 program design, content, resources, and logistics concerning program implementation (i.e., day  
38  
39 371 and time of sessions, structure of sessions, facility where program was delivered). To inform  
40  
41 372 future requirement strategies, data will also be collected from website usage patterns (Google  
42  
43 373 Analytics-frequencies, means, etc.) as they relate to key time points during the program (e.g.,  
44  
45 374 media releases) as well as using paper-based questions regarding how/where participants  
46  
47 375 heard about the program. Program-related statistics, including participant attendance, number  
48  
49 376 of guest presenters and metrics concerning program inquiries, participant communications and  
50  
51 377 follow-ups, will also be collected.  
52  
53  
54  
55  
56  
57  
58  
59  
60

1  
2  
3 378 Semi-structured telephone interviews will be undertaken with a subsample of  
4  
5  
6 379 participants (n=30) to gain further insight concerning satisfaction and acceptability of HAT  
7  
8 380 TRICK, and to understand the challenges/enablers associated with design and implementation  
9  
10 381 of the program, including feasibility parameters such as recruitment, attendance, adherence  
11  
12 382 and acceptability of the program and content. Participants will be purposefully selected from  
13  
14 383 each of the three HATTRICK groups to include men reporting a range of feasibility and program  
15  
16 384 outcomes. These individuals will include those who have completed the program (i.e.,  
17  
18 385 completed baseline and 12-week follow-up assessment periods) and have attended at least  
19  
20 386 50% of the sessions (i.e., 6 of 12 weekly 90 minute sessions). Data collection and analysis will  
21  
22 387 occur simultaneously in three phases as the HATTRICK program is implemented. Interview  
23  
24 388 questions will be refined as data collection progresses to address gaps identified in the analysis  
25  
26 389 as well as expand on and verify emerging themes. Data from the interviews will be audio  
27  
28 390 recorded (with participants' permission) and transcribed verbatim with all identifiable  
29  
30 391 information removed. Data will be analyzed using thematic content analysis [80] to explore  
31  
32 392 participant satisfaction and enjoyment and to identify challenges experienced during program  
33  
34 393 implementation as well as factors that may have facilitated implementation. To enhance rigor,  
35  
36 394 at least two members of the research team will independently code participant responses into  
37  
38 395 relevant subthemes. Once all coding has been completed, subthemes will be discussed among  
39  
40 396 the two research team members to ensure bias is minimized. Any disagreements or concerns  
41  
42 397 that may arise during the analysis will be presented at this time and further discussion will be  
43  
44 398 carried out with the research team until consensus is reached.  
45  
46  
47  
48  
49  
50  
51  
52  
53  
54

#### 55 399 **Data Management**

56  
57  
58  
59  
60

1  
2  
3 400 Data collection, as well as handling and storage of data, will be coordinated within the  
4  
5  
6 401 Physical Health and Activity Behaviour (PHAB) Lab at the University of British Columbia.  
7  
8 402 Demographic, anthropometric and self-reported questionnaire data will be entered  
9  
10 403 electronically by a research team member. Accelerometer data will automatically be uploaded  
11  
12 404 from the accelerometers to an excel data file by two research team members. All paper-based  
13  
14 405 data will be stored in a secure and locked filing cabinet located in the PHAB lab. All electronic  
15  
16 406 data will be stored on a password-protected computer also located in the PHAB lab.  
17  
18  
19

20  
21 407 **Ethics and Dissemination:**  
22

23 408 Ethical approval for this trial was obtained from the University of British Columbia  
24  
25  
26 409 Okanagan Behavioural Research Ethics Board (#H1600736). Participants will provide informed  
27  
28 410 consent and medical clearance prior to all baseline assessment. Participants will also be  
29  
30 411 informed that they may withdraw from the study at any time, for any reason, without  
31  
32 412 consequence. All personal data will be coded and handled with confidentiality.  
33  
34  
35

36 413 Study findings will be disseminated widely through national and international academic  
37  
38 414 meetings, peer reviewed publication and by web-based activities (e.g., podcasts, research  
39  
40 415 webinars). In addition, these findings will also be disseminated through social media (e.g.,  
41  
42 416 facebook, twitter), plain language summaries to participants, summary briefings to local  
43  
44 417 stakeholders and government agencies, and co-delivered (i.e., researcher-participants)  
45  
46 418 community presentations.  
47  
48  
49

50  
51 419

52  
53 420 **DISCUSSION**  
54  
55  
56  
57  
58  
59  
60



1  
2  
3 421 Engaging men in health promoting behaviors, such as PA and healthy eating can be  
4  
5  
6 422 challenging. Men have often been regarded as ‘hard to reach’ in terms of health promotion  
7  
8 423 programs with linkages being made to some masculine ideals as contributing to men’s  
9  
10 424 estrangement from self-health. This is further supported by the research which has suggested  
11  
12 425 that many men are reticent to attend health promotion education sessions, disinterested in  
13  
14 426 information concerning disease prevention and estranged from professional health care  
15  
16 427 services [81, 82] although more recent research is beginning to challenge such stereotypes.  
17  
18 428 Some researchers suggest these ‘traditional’ patterns are implicated in Western men’s shorter  
19  
20 429 life expectancy compared to women and high morbidity rates associated with chronic disease  
21  
22 430 [83, 84]. Thus, men are a population that would benefit from effective targeted programs to  
23  
24 431 engage them in disease preventing behaviors, including PA and healthy eating. To reach and  
25  
26 432 engage men, innovative approaches that acknowledge and play to specific masculine values  
27  
28 433 and virtues show promise in garnering significant success in advancing the health of men and  
29  
30 434 their families [16, 23, 27].  
31  
32  
33  
34  
35  
36  
37

38 435 HAT TRICK was designed to address these specific elements by creating an evidence  
39  
40 436 based program that employed men-friendly strategies to fully engage men’s participation,  
41  
42 437 including; aligning with an elite male sports team (i.e., Kelowna Rockets), promoting friendly  
43  
44 438 competition, and delivering the program in a familiar “place” (i.e., hockey arena and  
45  
46 439 surrounding male-friendly community venues) where men ordinarily gather and connect with  
47  
48 440 others (i.e., male facilitators and male only participants) who share similar interests. Appealing  
49  
50 441 to these well-known masculine values and norms including friendly competition, and catering  
51  
52  
53  
54  
55  
56  
57  
58  
59  
60

1  
2  
3 442 to methods and modes of delivery that recognizes gender differences have been successful  
4  
5  
6 443 approaches to men-centered PA and healthy eating programs [23, 24, 39].  
7

8 444 Another promising aspect of HAT TRICK is its potential to be transferred across a  
9  
10 445 number of male populations and settings, thus further increasing its reach to a large proportion  
11  
12 446 of men. In part, HAT TRICK is based on the successful Football Fan In Training (FFIT) intervention  
13  
14 447 [24, 27], which was designed to engage overweight Scottish men in weight management and  
15  
16 448 healthy living program by capitalizing on men's team loyalty and love of the game of soccer.  
17  
18 449 FFIT was specifically developed within a context that supports masculine ideals, encompassing a  
19  
20 450 look and feel that appeals to many men [19, 29]. HAT TRICK utilized these same principles, but  
21  
22 451 altered the context of delivery by developing the program to fit with the national sports  
23  
24 452 obsession of Canadian men, ice hockey. Specifically, the program's name (HAT TRICK), logo  
25  
26 453 design, resources and content are all influenced by the sport of ice hockey. Although this  
27  
28 454 particular program was designed to appeal to male Canadian ice hockey fans, the unique aspect  
29  
30 455 of this model is that it can be easily modified to appeal to male fans of other sports or activities.  
31  
32 456 For instance, the same model has been recreated to appeal to Rugby fans in the UK. The Rugby  
33  
34 457 Fans in Training (RuFIT) [85] study (and subsequently Premiership Rugby's Move Like a Pro  
35  
36 458 program) aimed to test the FFIT model in the English professional rugby club setting, and to  
37  
38 459 enhance long term weight loss and lifestyle change for men in the UK. In North America, a  
39  
40 460 similar approach could be transferable to other popular sports including gridiron, basketball  
41  
42 461 and baseball, all of which exist within professional leagues that have a strong male fan base.  
43  
44  
45  
46  
47  
48  
49  
50

51 462 Although HAT TRICK can be recreated and transferred to suit fans of a variety of sports,  
52  
53 463 we do acknowledge that there is a great diversity of men within Canada (e.g., new immigrant  
54  
55  
56  
57  
58  
59  
60

1  
2  
3 464 men, older age men, gay men, men from remote areas) who may have other interests beyond  
4  
5  
6 465 sport. Thus, prior to undertaking refinements and restructuring the program, formative  
7  
8 466 evaluations should be undertaken with these specific male groups in order to gain further  
9  
10 467 knowledge concerning local, regional and global masculine values and norms [21].  
11  
12

13 468 In conclusion, given the limited published research for effective and feasible approaches  
14  
15  
16 469 to men's health promotion, but the promise shown by programs such as FFIT, the results of this  
17  
18 470 feasibility study will serve as a valuable platform to guide future work. There also seems to be  
19  
20  
21 471 great opportunity for sustainability and scalability of the HAT TRICK program based on its  
22  
23 472 transferability and the thoughtful deliberate formal evaluation of this intervention.  
24  
25

26 473

#### 27 28 474 **TRIAL STATUS**

29  
30  
31 475 Recruitment for this study began in December 2016 and is ongoing until September 2017.  
32  
33

34 476

#### 35 36 477 **AUTHOR CONTRIBUTIONS**

37  
38 478 CMC, JLB, JLO, STJ, KH conceived the project and procured the project funding. CMC is leading  
39  
40 479 the coordination of the trial. CMC, JLB, JLO, STJ, KH, contributed to the study design. PS is  
41  
42 480 managing the trial, including data collection, with assistance from KMF and RP. CMC, PS, KMF  
43  
44 481 and RP drafted the manuscript and all authors read, edited and approved the final manuscript.  
45  
46  
47

48 482

#### 49 50 51 483 **FUNDING**

1  
2  
3 484 This research is being funded by the Canadian Cancer Society (grant #704230). Kate Hunt is  
4  
5  
6 485 supported by the UK Medical Research Council (MC\_UU12017/12) and the Chief Scientist Office  
7  
8 486 (SPHSU12).  
9

10 487

11  
12  
13 488 **COMPETING INTERESTS**  
14

15  
16 489 All authors state that they have no competing interests to declare.  
17

18 490  
19

20  
21 491 **DATA SHARING**  
22

23 492 The datasets analyzed during the current trial will be available from the corresponding author  
24  
25  
26 493 on reasonable request.  
27

28 494  
29

30  
31 495 **PROVENCE AND PEER REVIEW**  
32

33 496 Not commissioned; externally peer reviewed.  
34

35  
36 497  
37  
38  
39  
40  
41  
42  
43  
44  
45  
46  
47  
48  
49  
50  
51  
52  
53  
54  
55  
56  
57  
58  
59  
60

498 **REFERENCES**

- 499 1. Lee CD, Sui X, Hooker SP, *et al*. Combined impact of lifestyle factors on cancer mortality  
500 in men. *Ann Epidemiol* 2011;21(10):749-54.
- 501 2. Shiroma EJ, Sesso HD, Lee IM. Physical activity and weight gain prevention in older men.  
502 *Int J Obes (Lond)* 2012;36(9):1165-9.
- 503 3. Kohl HW, 3rd, Craig CL, Lambert EV, *et al*. The pandemic of physical inactivity: global  
504 action for public health. *Lancet* 2012;380(9838):294-305.
- 505 4. Nunan D, Mahtani KR, Roberts N, *et al*. Physical activity for the prevention and  
506 treatment of major chronic disease: an overview of systematic reviews. *Syst Rev* 2013;2:56.
- 507 5. WHO. *Global Recommendations on Physical Activity and Health*. Geneva: World Health  
508 Organization 2010.
- 509 6. Wardle J, Haase AM, Steptoe A, *et al*. Gender differences in food choice: the  
510 contribution of health beliefs and dieting. *Ann Behav Med* 2004;27(2):107-16.
- 511 7. Baker AH, Wardle J. Sex differences in fruit and vegetable intake in older adults.  
512 *Appetite* 2003;40(3):269-75.
- 513 8. Belanger-Ducharme F, Tremblay A. Prevalence of obesity in Canada. *Obes Rev*  
514 2005;6(3):183-6.
- 515 9. Baker P. Current issues in men's health. *Trends Urol Men's Health* 2012;3:19-21.
- 516 10. Sinclair A, Alexander HA. Using outreach to involve the hard-to-reach in a health check:  
517 what difference does it make? *BMC Public Health* 2012;126(2):87-95.
- 518 11. Courtenay WH. Constructions of masculinity and their influence on men's well-being: a  
519 theory of gender and health. *Soc Sci Med* 2000;50(10):1385-401.

- 1  
2  
3 520 12. Courtenay WE. Making health manly: Norms, peers, and men's health. In: Cohen L,  
4  
5  
6 521 Chavez V, Chehimi S, editors. *Prevention is primary; Strategies for community wellbeing*. San  
7  
8 522 Francisco, CA: Jossey-Bass; 2007.
- 9  
10  
11 523 13. Gough B. Try to be healthy, but don't forgot your masculinity: deconstructing men's  
12  
13 524 health discourse in the media. *Soc Sci Med* 2006;63(9):2476-88.
- 14  
15  
16 525 14. Robertson S. *Understanding men and health: Masculinities, identities and well-being*.  
17  
18 526 Buckingham, UK: Open University Press; 2007.
- 19  
20  
21 527 15. Sloan C, Gough B, Conner M. Healthy masculinities? How ostensibly healthy men talk  
22  
23 528 about lifestyle, health and gender. *Psychol Health* 2010;25(7):783-803.
- 24  
25  
26 529 16. Cormie P, Oliffe JL, Wootten AC, *et al*. Improving psychosocial health in men with  
27  
28 530 prostate cancer through an intervention that reinforces masculine values - exercise.  
29  
30  
31 531 *Psychooncology* 2015.
- 32  
33 532 17. Gough B. 'Real men don't diet': an analysis of contemporary newspaper representations  
34  
35 533 of men, food and health. *Soc Sci Med* 2007;64(2):326-37.
- 36  
37  
38 534 18. Pringle A, Zwolinsky S, McKenna J, *et al*. Health improvement for men and hard-to-  
39  
40 535 engage-men delivered in English Premier League football clubs. *Health Educ Res*  
41  
42 536 2014;29(3):503-20.
- 43  
44  
45 537 19. Gray CM, Hunt K, Mutrie N, *et al*. Football Fans in Training: the development and  
46  
47 538 optimization of an intervention delivered through professional sports clubs to help men lose  
48  
49 539 weight, become more active and adopt healthier eating habits. *BMC Public Health* 2013;13:232.
- 50  
51  
52 540 20. Oliffe JL, Bottorff JL, Sharp P, *et al*. Healthy Eating and Active Living: Rural Based  
53  
54 541 Working Men's Perspectives. *Am J Mens Health* 2015.
- 55  
56  
57  
58  
59  
60

- 1  
2  
3 542 21. Caperchione CM, Sharp P, Botorff JL, *et al.* The POWERPLAY workplace physical activity  
4  
5  
6 543 and nutrition intervention for men: Study protocol and baseline characteristics. *Contemp Clin*  
7  
8 544 *Trials* 2015;44:42-7.
- 9  
10 545 22. Johnson ST, Stolp S, Seaton C, *et al.* A Men's Workplace Health Intervention: Results of  
11  
12 546 the POWERPLAY Program Pilot Study. *J Occup Environ Med* 2016;58(8):765-9.
- 13  
14 547 23. Caperchione CM, Stolp S, Botorff JL, *et al.* Changes in Men's Physical Activity and  
15  
16 548 Healthy Eating Knowledge and Behavior as a Result of Program Exposure: Findings From the  
17  
18 549 Workplace POWERPLAY Program. *J Phys Act Health* 2016;13(12):1364-71.
- 19  
20  
21 550 24. Wyke S, Hunt K, Gray CM, *et al.* Football Fans in Training (FFIT): a randomised controlled  
22  
23 551 trial of a gender-sensitised weight loss and healthy living programme for men-end of study  
24  
25 552 report. *Public Health Res* 2015;3(2):1-129.
- 26  
27  
28 553 25. Mason OJ, Holt R. Mental health and physical activity interventions: a review of the  
29  
30 554 qualitative literature. *J Mental Health* 2012;21(3):274-84.
- 31  
32  
33 555 26. Brady AJ, Perry C, Murdoch DL, *et al.* Sustained benefits of a health project for middle-  
34  
35 556 aged football supporters, at Glasgow Celtic and Glasgow Rangers Football Clubs. *Eur Heart J*  
36  
37 557 2010;31(24):2696-8.
- 38  
39 558 27. Hunt K, Wyke S, Gray CM, *et al.* A gender-sensitised weight loss and healthy living  
40  
41 559 programme for overweight and obese men delivered by Scottish Premier League football clubs  
42  
43 560 (FFIT): a pragmatic randomised controlled trial. *Lancet* 2014;383(9924):1211-21.
- 44  
45  
46 561 28. Gill DP, Blunt W, De Cruz A, *et al.* Hockey Fans in Training (Hockey FIT) pilot study  
47  
48 562 protocol: a gender-sensitized weight loss and healthy lifestyle program for overweight and  
49  
50 563 obese male hockey fans. *BMC Public Health* 2016;16(1):1096.
- 51  
52  
53  
54  
55  
56  
57  
58  
59  
60

- 1  
2  
3 564 29. Hunt K, McCann C, Gray CM, *et al.* "You've got to walk before you run": positive  
4  
5  
6 565 evaluations of a walking program as part of a gender-sensitized, weight-management program  
7  
8 566 delivered to men through professional football clubs. *Health Psychol* 2013;32(1):57-65.  
9  
10 567 30. Bunn C, Wyke S, Gray CM, *et al.* 'Coz football is what we all have': masculinities,  
11  
12 568 practice, performance and effervescence in a gender-sensitised weight-loss and healthy living  
13  
14 569 programme for men. *Sociol Health Illn* 2016;38(5):812-28.  
15  
16 570 31. Canadian Hockey League. Canadian Hockey League. Scarborough, ON2017 [cited 2017  
17  
18 571 25 Feb]; Available from: <http://chl.ca/>.  
19  
20  
21  
22  
23 572 32. Chan AW, Tetzlaff JM, Gotzsche PC, *et al.* SPIRIT 2013 explanation and elaboration:  
24  
25 573 guidance for protocols of clinical trials. *BMJ* 2013;346:e7586.  
26  
27  
28 574 33. Arain M, Campbell MJ, Cooper CL, *et al.* What is a pilot or feasibility study? A review of  
29  
30 575 current practice and editorial policy. *BMC Med Res Methodol* 2010;10:67.  
31  
32  
33 576 34. McLeroy KR, Bibeau D, Steckler A, *et al.* An ecological perspective on health promotion  
34  
35 577 programs. *Health Educ Q* 1988;15(4):351-77.  
36  
37  
38 578 35. Canadian Society for Exercise Physiology. Physical Activity and Readiness Questionnaire  
39  
40 579 for everyone: PAR-Q+. Ottawa, ON: Canadian Society for Exercise Physiology: CSEP; 2012 [cited  
41  
42 580 Feb 2017 21]; Available from:  
43  
44 581 [http://www.csep.ca/cmfiles/publications/parq/parqplusept2011version\\_all.pdf](http://www.csep.ca/cmfiles/publications/parq/parqplusept2011version_all.pdf).  
45  
46  
47  
48 582 36. Duncan MJ, Rosenkranz RR, Vandelanotte C, *et al.* What is the impact of obtaining  
49  
50 583 medical clearance to participate in a randomised controlled trial examining a physical activity  
51  
52 584 intervention on the socio-demographic and risk factor profiles of included participants? *Trials*  
53  
54 585 2016;17(1):580.  
55  
56  
57  
58  
59  
60



- 1  
2  
3 586 37. Canadian Society for Exercise Physiology. Canadian Society for Exercise Physiology  
4  
5  
6 587 (CSEP). Ottawa, ON1967 [10 Feb 2017]; Available from: <http://www.csep.ca/en/about->  
7  
8 588 [csep/about-the-canadian-society-for-exercise-physiology](http://www.csep.ca/en/about-csep/about-the-canadian-society-for-exercise-physiology).  
9  
10  
11 589 38. Botorff JL, Seaton CL, Johnson ST, *et al*. An Updated Review of Interventions that  
12  
13 590 Include Promotion of Physical Activity for Adult Men. *Sports Med* 2015;45(6):775-800.  
14  
15  
16 591 39. Caperchione CM, Vandelanotte C, Kolt GS, *et al*. What a man wants: understanding the  
17  
18 592 challenges and motivations to physical activity participation and healthy eating in middle-aged  
19  
20  
21 593 Australian men. *Am J Mens Health* 2012;6(6):453-61.  
22  
23  
24 594 40. Bandura A. *Social foundation of thought and action: A social cognitive theory*.  
25  
26 595 Englewood Cliffs, NJ: Prentice-Hall; 1986.  
27  
28  
29 596 41. Bandura A. Social Cognitive theory of self-regulation. *Organ Behav Hum Decis Process*  
30  
31 597 1991;50(2):248-87.  
32  
33  
34 598 42. Deci EL, Ryan RM. *Intrinsic motivation and self-determination in human behavior*. New  
35  
36 599 York, NY: Plenum; 1985.  
37  
38  
39 600 43. Taylor PJ, Kolt GS, Vandelanotte C, *et al*. A review of the nature and effectiveness of  
40  
41 601 nutrition interventions in adult males--a guide for intervention strategies. *Int J Behav Nutr Phys*  
42  
43 602 *Act* 2013;10:13.  
44  
45  
46 603 44. Verdonk P, Seesing H, de Rijk A. Doing masculinity, not doing health? A qualitative study  
47  
48 604 among Dutch male employees about health beliefs and workplace physical activity. *BMC Public*  
49  
50 605 *Health* 2010;10:712.  
51  
52  
53 606 45. George ES, Kolt GS, Duncan MJ, *et al*. A review of the effectiveness of physical activity  
54  
55 607 interventions for adult males. *Sports Med* 2012;42(4):281-300.  
56  
57  
58  
59  
60

- 1  
2  
3 608 46. Morgan PJ, Collins CE, Plotnikoff RC, *et al.* Efficacy of a workplace-based weight loss  
4  
5  
6 609 program for overweight male shift workers: the Workplace POWER (Preventing Obesity  
7  
8 610 Without Eating like a Rabbit) randomized controlled trial. *Prev Med* 2011;52(5):317-25.  
9  
10  
11 611 47. National Institute of Health. Clinical guidelines on the identification, evaluation, and  
12  
13 612 treatment of overweight and obesity in adults-the evidence report. Washington, DC1998. p. 56-  
14  
15 613 94.  
16  
17  
18 614 48. Freedson PS, Melanson E, Sirard J. Calibration of the Computer Science and Applications,  
19  
20 615 Inc. accelerometer. *Med Sci Sports Exerc* 1998;30(5):777-81.  
21  
22  
23 616 49. Troiano RP, Berrigan D, Dodd KW, *et al.* Physical activity in the United States measured  
24  
25 617 by accelerometer. *Med Sci Sports Exerc* 2008;40(1):181-8.  
26  
27  
28 618 50. Kelly LA, McMillan DG, Anderson A, *et al.* Validity of actigraphs uniaxial and triaxial  
29  
30 619 accelerometers for assessment of physical activity in adults in laboratory conditions. *BMC Med*  
31  
32 620 *Phys* 2013;13(1):5.  
33  
34  
35 621 51. Sasaki JE, John D, Freedson PS. Validation and comparison of ActiGraph activity  
36  
37 622 monitors. *J Sci Med Sport* 2011;14(5):411-6.  
38  
39  
40 623 52. Vanhelst J, Mikulovic J, Bui-Xuan G, *et al.* Comparison of two ActiGraph accelerometer  
41  
42 624 generations in the assessment of physical activity in free living conditions. *BMC Res Notes*  
43  
44 625 2012;5:187.  
45  
46  
47 626 53. Godin G, Shephard RJ. A simple method to assess exercise behavior in the community.  
48  
49 627 *Can J Appl Sport Sci* 1985;10(3):141-6.  
50  
51  
52 628 54. Brown WJ, Bauman AE. Comparison of estimates of population levels of physical activity  
53  
54 629 using two measures. *Aust N Z J Public health* 2000;24(5):520-5.  
55  
56  
57  
58  
59  
60

- 1  
2  
3 630 55. Plotnikoff RC, Johnson ST, Loucaides CA, *et al.* Population-based estimates of physical  
4  
5  
6 631 activity for adults with type 2 diabetes: a cautionary tale of potential confounding by weight  
7  
8 632 status. *J Obes* 2011;2011.
- 9  
10 633 56. Godin G, Jobin J, Bouillon J. Assessment of leisure time exercise behavior by self-report:  
11  
12 634 a concurrent validity study. *Can J Public Health* 1986;77(5):359-62.
- 13  
14  
15 635 57. Jacobs DR, Jr., Ainsworth BE, Hartman TJ, *et al.* A simultaneous evaluation of 10  
16  
17 636 commonly used physical activity questionnaires. *Med Sci Sports Exerc* 1993;25(1):81-91.
- 18  
19  
20 637 58. Hyde AL, Elavsky S, Doerksen SE, *et al.* The stability of automatic evaluations of physical  
21  
22 638 activity and their relations with physical activity. *J Sport Exerc Psychol* 2012;34(6):715-36.
- 23  
24  
25 639 59. Marshall AL, Miller YD, Burton NW, *et al.* Measuring total and domain-specific sitting: a  
26  
27 640 study of reliability and validity. *Med Sci Sports Exerc* 2010;42(6):1094-102.
- 28  
29  
30 641 60. Roe L, Strong C, Whiteside C, *et al.* Dietary intervention in primary care: validity of the  
31  
32 642 DINE method for diet assessment. *Fam Pract* 1994;11(4):375-81.
- 33  
34  
35 643 61. Cole JA, Gillespie P, Smith SM, *et al.* Using postal questionnaires to evaluate physical  
36  
37 644 activity and diet behaviour change: case study exploring implications of valid responder  
38  
39 645 characteristics in interpreting intervention outcomes. *BMC Res Notes* 2014;7:725.
- 40  
41  
42 646 62. John JH, Ziebland S, Yudkin P, *et al.* Effects of fruit and vegetable consumption on  
43  
44 647 plasma antioxidant concentrations and blood pressure: a randomised controlled trial. *Lancet*  
45  
46 648 2002;359(9322):1969-74.
- 47  
48  
49 649 63. Diemert L, Kueller-Olaman R, Schwartz R, *et al.* Data Standards for Smoke-free Ontario  
50  
51 650 Smoking Cessation Service Providers: Core Indicators and Questions for Intake and Follow-up of  
52  
53 651 Adult Respondents. Toronto, ON: Ontario Tobacco Research Unit; 2013.
- 54  
55  
56  
57  
58  
59  
60

- 1  
2  
3 652 64. Emslie C, Lewars H, Batty GD, *et al.* Are there gender differences in levels of heavy,  
4  
5  
6 653 binge and problem drinking? Evidence from three generations in the west of Scotland. *BMC*  
7  
8 654 *Public Health* 2009;123(1):12-4.
- 9  
10 655 65. Centres for Disease Control and Prevention. Sleep Disorders: National Health and  
11  
12 656 Nutrition Examination Survey 2013. Centres for Disease Control and Prevention,; 2013.
- 13  
14 657 66. Rice SM, Fallon BJ, Aucote HM, *et al.* Development and preliminary validation of the  
15  
16 658 male depression risk scale: furthering the assessment of depression in men. *J Affect Disord*  
17  
18 659 2013;151(3):950-8.
- 19  
20  
21 660 67. Rice SM, Fallon BJ, Aucote HM, *et al.* Longitudinal sex differences of externalising and  
22  
23 661 internalising depression symptom trajectories: Implications for assessment of depression in  
24  
25 662 men from an online study. *Int J Soc Psychiatry* 2015;61(3):236-40.
- 26  
27 663 68. Ware J, Jr., Kosinski M, Keller SD. A 12-Item Short-Form Health Survey: construction of  
28  
29 664 scales and preliminary tests of reliability and validity. *Med Care* 1996;34(3):220-33.
- 30  
31 665 69. Ware JE, Kosinski M, Keller SD. *SF-36 Physical and Mental Healthy Summary Scales: A*  
32  
33 666 *User's Manual*. Boston, MA: The Health Institute, New England Medical Center 1994.
- 34  
35 667 70. Ware JE, Kosinski M, Keller SD. *SF-12: How to score the SF-12 Physical and Mental Health*  
36  
37 668 *Summary Scales*. 3rd, editor. Lincoln, RI: Quality Metric Incorporated; 1998.
- 38  
39 669 71. Jenkinson C, Chandola T, Coulter A, *et al.* An assessment of the construct validity of the  
40  
41 670 SF-12 summary scores across ethnic groups. *J Public Health Med* 2001;23(3):187-94.
- 42  
43 671 72. Burdine JN, Felix MR, Abel AL, *et al.* The SF-12 as a population health measure: an  
44  
45 672 exploratory examination of potential for application. *Health Serv Res* 2000;35(4):885-904.
- 46  
47  
48  
49  
50  
51  
52  
53  
54  
55  
56  
57  
58  
59  
60

- 1  
2  
3 673 73. Jakobsson U. Using the 12-item Short Form health survey (SF-12) to measure quality of  
4  
5  
6 674 life among older people. *Aging Clin Exp Res* 2007;19(6):457-64.  
7  
8 675 74. Wee CC, Davis RB, Hamel MB. Comparing the SF-12 and SF-36 health status  
9  
10 676 questionnaires in patients with and without obesity. *Health Qual Life Outcomes* 2008;6:11.  
11  
12 677 75. Koenig HG, Westlund RE, George LK, *et al.* Abbreviating the Duke Social Support Index  
13  
14 678 for use in chronically ill elderly individuals. *Psychosomatics* 1993;34(1):61-9.  
15  
16 679 76. Goodger B, Byles J, Higganbotham N, *et al.* Assessment of a short scale to measure  
17  
18 680 social support among older people. *Aust N Z J Public Health* 1999;23(3):260-5.  
19  
20 681 77. Powers JR, Goodger B, Byles JE. Assessment of the abbreviated Duke Social Support  
21  
22 682 Index in a cohort of Australian women. *Austral J Age* 2004;23(2):71-6.  
23  
24 683 78. Ebeling-Witte S, Frank ML, Lester D. Shyness, Internet use, and personality.  
25  
26 684 *Cyberpsychol Behav* 2007;10(5):713-6.  
27  
28 685 79. Pachana NA, Smith N, Watson M, *et al.* Responsiveness of the Duke Social Support sub-  
29  
30 686 scales in older women. *Age Ageing* 2008;37(6):666-72.  
31  
32 687 80. Braun V, Clarke V. Using thematic analysis in psychology. *Qual Res Psychol* 2006;3(2):77-  
33  
34 688 101.  
35  
36 689 81. Lee C, Owen GR. *The Psychology of Men's Health*. Payne S, Horn S, editors. Philadelphia:  
37  
38 690 Open University Press; 2002.  
39  
40 691 82. Deeks A, Lombard C, Michelmore J, *et al.* The effects of gender and age on health  
41  
42 692 related behaviors. *BMC Public Health* 2009;9:213.  
43  
44  
45  
46  
47  
48  
49  
50  
51  
52  
53  
54  
55  
56  
57  
58  
59  
60

- 1  
2  
3 693 83. Pinkhasov RM, Wong J, Kashanian J, *et al.* Are men shortchanged on health? Perspective  
4  
5  
6 694 on health care utilization and health risk behavior in men and women in the United States. *Int J*  
7  
8 695 *Clin Pract* 2010;64(4):475-87.  
9  
10  
11 696 84. Salomon JA, Wang H, Freeman MK, *et al.* Healthy life expectancy for 187 countries,  
12  
13 697 1990-2010: a systematic analysis for the Global Burden Disease Study 2010. *Lancet*  
14  
15  
16 698 2012;380(9859):2144-62.  
17  
18 699 85. Gray CM, Brennan G, Maclean A, *et al.* Can professional rugby clubs attract English male  
19  
20  
21 700 rugby supporters to a healthy lifestyle programme: the Rugby Fans in Training (RuFIT). *Eur J*  
22  
23 701 *Public Health* 2014;24(suppl 2):166.  
24  
25  
26 702  
27  
28 703  
29  
30 704  
31  
32 705  
33  
34 706  
35  
36 707  
37  
38 708  
39  
40 709  
41  
42 710  
43  
44  
45  
46  
47  
48  
49  
50  
51  
52  
53  
54  
55  
56  
57  
58  
59  
60

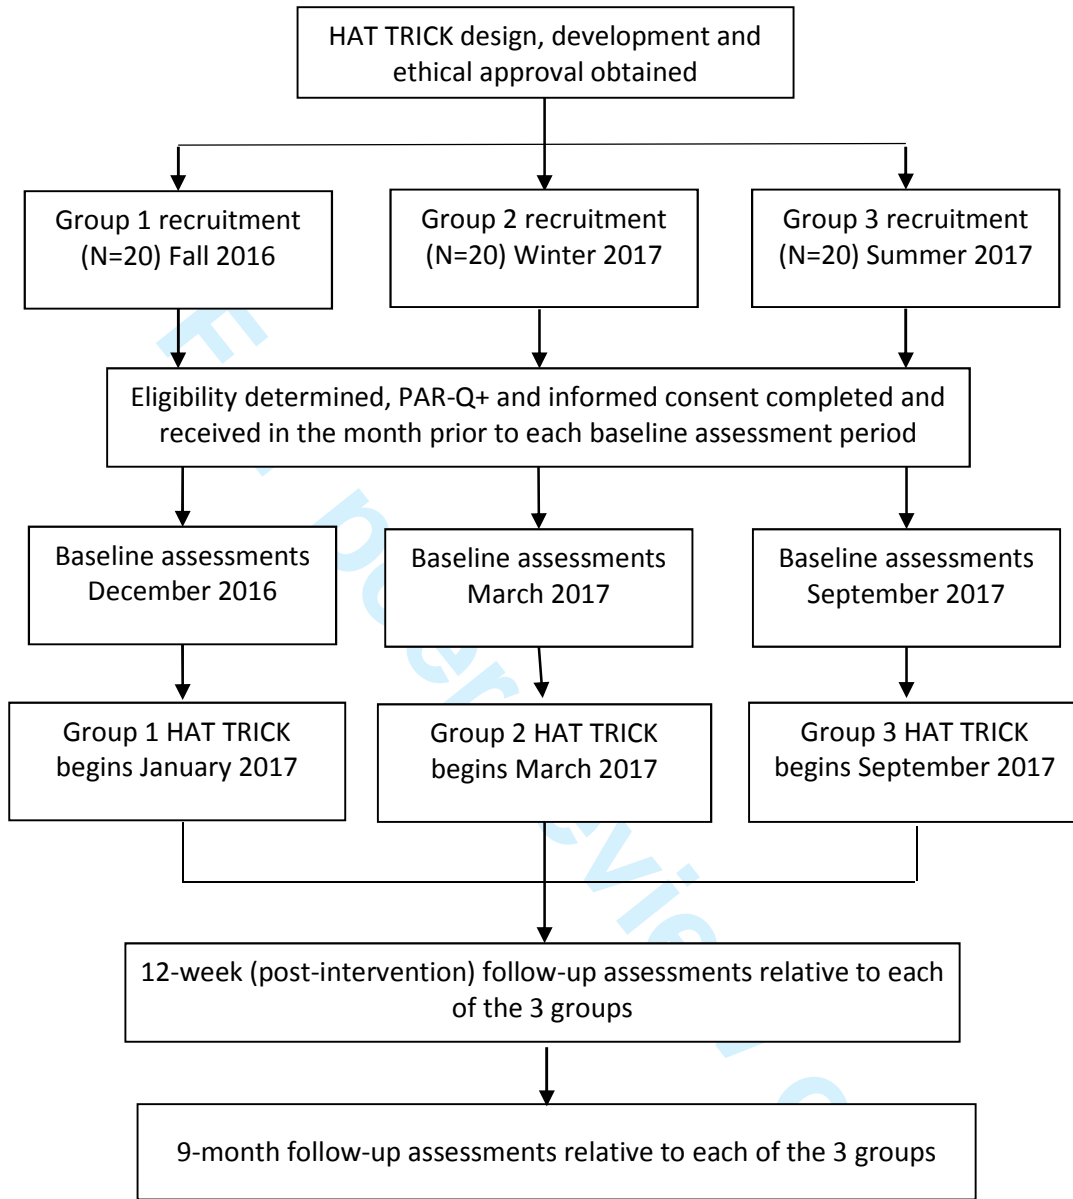

Figure 1. Flow diagram of HAT TRICK protocol

| TIMEPOINT**                   | STUDY PERIOD  |            |                                                                                    |                   |
|-------------------------------|---------------|------------|------------------------------------------------------------------------------------|-------------------|
|                               | Enrolment     | Allocation |                                                                                    | Close-out         |
|                               | -8 to 0 weeks | 0 week     | 1-12 weeks                                                                         | 9-month follow-up |
| <b>ENROLMENT:</b>             |               |            |                                                                                    |                   |
| Eligibility screen            | X             |            |                                                                                    |                   |
| Informed consent              | X             |            |                                                                                    |                   |
| Medical clearance             | X             |            |                                                                                    |                   |
| <b>INTERVENTIONS:</b>         |               |            |                                                                                    |                   |
| <i>HAT TRICK Intervention</i> |               |            |  |                   |
| <b>ASSESSMENTS:</b>           |               |            |                                                                                    |                   |
| Demographics                  |               | X          |                                                                                    |                   |
| Anthropometrics               |               | X          | X                                                                                  | X                 |
| Physical Activity             |               | X          | X                                                                                  | X                 |
| Sedentary behavior            |               | X          | X                                                                                  | X                 |
| Dietary behavior              |               | X          | X                                                                                  | X                 |
| Smoking                       |               | X          | X                                                                                  | X                 |
| Alcohol consumption           |               | X          | X                                                                                  | X                 |
| Sleep habits                  |               | X          | X                                                                                  | X                 |
| Risk of depression            |               | X          | X                                                                                  | X                 |
| HRQoL                         |               | X          | X                                                                                  | X                 |
| Social support                |               | X          | X                                                                                  | X                 |
| Program Feasibility           |               |            | X                                                                                  |                   |

Figure 2. Standard Protocol Items: Recommendations for Interventional Trials (SPIRIT) figure



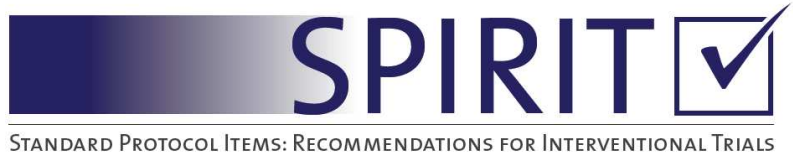

1  
2  
3  
4  
5  
6  
7  
8  
9  
10  
11  
12  
13  
14  
15  
16  
17  
18  
19  
20  
21  
22  
23  
24  
25  
26  
27  
28  
29  
30  
31  
32  
33  
34  
35  
36  
37  
38  
39  
40  
41  
42  
43  
44  
45  
46  
47  
48  
49

SPIRIT 2013 Checklist: Recommended items to address in a clinical trial protocol and related documents\*

| Section/item                      | Item No | Description                                                                                                                                                                                                                                                                              | Addressed on page number |
|-----------------------------------|---------|------------------------------------------------------------------------------------------------------------------------------------------------------------------------------------------------------------------------------------------------------------------------------------------|--------------------------|
| <b>Administrative information</b> |         |                                                                                                                                                                                                                                                                                          |                          |
| Title                             | 1       | Descriptive title identifying the study design, population, interventions, and, if applicable, trial acronym                                                                                                                                                                             | ___ 1 ___                |
| Trial registration                | 2a      | Trial identifier and registry name. If not yet registered, name of intended registry                                                                                                                                                                                                     | ___ 4 ___                |
|                                   | 2b      | All items from the World Health Organization Trial Registration Data Set                                                                                                                                                                                                                 | ___ n/a ___              |
| Protocol version                  | 3       | Date and version identifier                                                                                                                                                                                                                                                              | ___ 7-8 ___              |
| Funding                           | 4       | Sources and types of financial, material, and other support                                                                                                                                                                                                                              | ___ 25 ___               |
| Roles and responsibilities        | 5a      | Names, affiliations, and roles of protocol contributors                                                                                                                                                                                                                                  | ___ 1 & 25 ___           |
|                                   | 5b      | Name and contact information for the trial sponsor                                                                                                                                                                                                                                       | ___ 1 ___                |
|                                   | 5c      | Role of study sponsor and funders, if any, in study design; collection, management, analysis, and interpretation of data; writing of the report; and the decision to submit the report for publication, including whether they will have ultimate authority over any of these activities | ___ 25 ___               |
|                                   | 5d      | Composition, roles, and responsibilities of the coordinating centre, steering committee, endpoint adjudication committee, data management team, and other individuals or groups overseeing the trial, if applicable (see Item 21a for data monitoring committee)                         | ___ n/a ___              |

1  
2  
3 **Introduction**  
4

|                  |    |                                                                                                                                                                                                           |               |
|------------------|----|-----------------------------------------------------------------------------------------------------------------------------------------------------------------------------------------------------------|---------------|
| 5 Background and | 6a | Description of research question and justification for undertaking the trial, including summary of relevant studies (published and unpublished) examining benefits and harms for each intervention        | _____5-7_____ |
| 6 rationale      |    |                                                                                                                                                                                                           |               |
| 7                |    |                                                                                                                                                                                                           |               |
| 8                | 6b | Explanation for choice of comparators                                                                                                                                                                     | _____5-7_____ |
| 9                |    |                                                                                                                                                                                                           |               |
| 10 Objectives    | 7  | Specific objectives or hypotheses                                                                                                                                                                         | _____7_____   |
| 11               |    |                                                                                                                                                                                                           |               |
| 12 Trial design  | 8  | Description of trial design including type of trial (eg, parallel group, crossover, factorial, single group), allocation ratio, and framework (eg, superiority, equivalence, noninferiority, exploratory) | _____7-8_____ |
| 13               |    |                                                                                                                                                                                                           |               |
| 14               |    |                                                                                                                                                                                                           |               |

15  
16 **Methods: Participants, interventions, and outcomes**  
17

|                         |     |                                                                                                                                                                                                                                                                                                                                                                                |                    |
|-------------------------|-----|--------------------------------------------------------------------------------------------------------------------------------------------------------------------------------------------------------------------------------------------------------------------------------------------------------------------------------------------------------------------------------|--------------------|
| 18 Study setting        | 9   | Description of study settings (eg, community clinic, academic hospital) and list of countries where data will be collected. Reference to where list of study sites can be obtained                                                                                                                                                                                             | _____7, Fig 1&2_   |
| 19                      |     |                                                                                                                                                                                                                                                                                                                                                                                |                    |
| 20                      |     |                                                                                                                                                                                                                                                                                                                                                                                |                    |
| 21 Eligibility criteria | 10  | Inclusion and exclusion criteria for participants. If applicable, eligibility criteria for study centres and individuals who will perform the interventions (eg, surgeons, psychotherapists)                                                                                                                                                                                   | _____8-9_____      |
| 22                      |     |                                                                                                                                                                                                                                                                                                                                                                                |                    |
| 23                      |     |                                                                                                                                                                                                                                                                                                                                                                                |                    |
| 24 Interventions        | 11a | Interventions for each group with sufficient detail to allow replication, including how and when they will be administered                                                                                                                                                                                                                                                     | __9-13, Table 1    |
| 25                      |     |                                                                                                                                                                                                                                                                                                                                                                                |                    |
| 26                      |     |                                                                                                                                                                                                                                                                                                                                                                                |                    |
| 27                      | 11b | Criteria for discontinuing or modifying allocated interventions for a given trial participant (eg, drug dose change in response to harms, participant request, or improving/worsening disease)                                                                                                                                                                                 | __22_____          |
| 28                      |     |                                                                                                                                                                                                                                                                                                                                                                                |                    |
| 29                      |     |                                                                                                                                                                                                                                                                                                                                                                                |                    |
| 30                      | 11c | Strategies to improve adherence to intervention protocols, and any procedures for monitoring adherence (eg, drug tablet return, laboratory tests)                                                                                                                                                                                                                              | __9-11_____        |
| 31                      |     |                                                                                                                                                                                                                                                                                                                                                                                |                    |
| 32                      |     |                                                                                                                                                                                                                                                                                                                                                                                |                    |
| 33                      | 11d | Relevant concomitant care and interventions that are permitted or prohibited during the trial                                                                                                                                                                                                                                                                                  | __n/a_____         |
| 34                      |     |                                                                                                                                                                                                                                                                                                                                                                                |                    |
| 35 Outcomes             | 12  | Primary, secondary, and other outcomes, including the specific measurement variable (eg, systolic blood pressure), analysis metric (eg, change from baseline, final value, time to event), method of aggregation (eg, median, proportion), and time point for each outcome. Explanation of the clinical relevance of chosen efficacy and harm outcomes is strongly recommended | __13-19, Table 2   |
| 36                      |     |                                                                                                                                                                                                                                                                                                                                                                                |                    |
| 37                      |     |                                                                                                                                                                                                                                                                                                                                                                                |                    |
| 38                      |     |                                                                                                                                                                                                                                                                                                                                                                                |                    |
| 39                      |     |                                                                                                                                                                                                                                                                                                                                                                                |                    |
| 40                      |     |                                                                                                                                                                                                                                                                                                                                                                                |                    |
| 41 Participant timeline | 13  | Time schedule of enrolment, interventions (including any run-ins and washouts), assessments, and visits for participants. A schematic diagram is highly recommended (see Figure)                                                                                                                                                                                               | __Fig 2, Table 2__ |
| 42                      |     |                                                                                                                                                                                                                                                                                                                                                                                |                    |
| 43                      |     |                                                                                                                                                                                                                                                                                                                                                                                |                    |
| 44                      |     |                                                                                                                                                                                                                                                                                                                                                                                |                    |
| 45                      |     |                                                                                                                                                                                                                                                                                                                                                                                |                    |

|   |             |    |                                                                                                                                                                                       |            |
|---|-------------|----|---------------------------------------------------------------------------------------------------------------------------------------------------------------------------------------|------------|
| 1 |             |    |                                                                                                                                                                                       |            |
| 2 |             |    |                                                                                                                                                                                       |            |
| 3 | Sample size | 14 | Estimated number of participants needed to achieve study objectives and how it was determined, including clinical and statistical assumptions supporting any sample size calculations | __ 8, 20__ |
| 4 |             |    |                                                                                                                                                                                       |            |
| 5 |             |    |                                                                                                                                                                                       |            |
| 6 | Recruitment | 15 | Strategies for achieving adequate participant enrolment to reach target sample size                                                                                                   | __ 8-9__   |
| 7 |             |    |                                                                                                                                                                                       |            |

### 8 **Methods: Assignment of interventions (for controlled trials)**

#### 9 Allocation:

|    |                                  |     |                                                                                                                                                                                                                                                                                                                                                          |          |
|----|----------------------------------|-----|----------------------------------------------------------------------------------------------------------------------------------------------------------------------------------------------------------------------------------------------------------------------------------------------------------------------------------------------------------|----------|
| 10 |                                  |     |                                                                                                                                                                                                                                                                                                                                                          |          |
| 11 |                                  |     |                                                                                                                                                                                                                                                                                                                                                          |          |
| 12 | Sequence generation              | 16a | Method of generating the allocation sequence (eg, computer-generated random numbers), and list of any factors for stratification. To reduce predictability of a random sequence, details of any planned restriction (eg, blocking) should be provided in a separate document that is unavailable to those who enrol participants or assign interventions | __ n/a__ |
| 13 |                                  |     |                                                                                                                                                                                                                                                                                                                                                          |          |
| 14 |                                  |     |                                                                                                                                                                                                                                                                                                                                                          |          |
| 15 |                                  |     |                                                                                                                                                                                                                                                                                                                                                          |          |
| 16 |                                  |     |                                                                                                                                                                                                                                                                                                                                                          |          |
| 17 |                                  |     |                                                                                                                                                                                                                                                                                                                                                          |          |
| 18 | Allocation concealment mechanism | 16b | Mechanism of implementing the allocation sequence (eg, central telephone; sequentially numbered, opaque, sealed envelopes), describing any steps to conceal the sequence until interventions are assigned                                                                                                                                                | __ n/a__ |
| 19 |                                  |     |                                                                                                                                                                                                                                                                                                                                                          |          |
| 20 |                                  |     |                                                                                                                                                                                                                                                                                                                                                          |          |
| 21 |                                  |     |                                                                                                                                                                                                                                                                                                                                                          |          |
| 22 | Implementation                   | 16c | Who will generate the allocation sequence, who will enrol participants, and who will assign participants to interventions                                                                                                                                                                                                                                | __ n/a__ |
| 23 |                                  |     |                                                                                                                                                                                                                                                                                                                                                          |          |
| 24 |                                  |     |                                                                                                                                                                                                                                                                                                                                                          |          |
| 25 | Blinding (masking)               | 17a | Who will be blinded after assignment to interventions (eg, trial participants, care providers, outcome assessors, data analysts), and how                                                                                                                                                                                                                | __ n/a__ |
| 26 |                                  |     |                                                                                                                                                                                                                                                                                                                                                          |          |
| 27 |                                  |     |                                                                                                                                                                                                                                                                                                                                                          |          |
| 28 |                                  | 17b | If blinded, circumstances under which unblinding is permissible, and procedure for revealing a participant's allocated intervention during the trial                                                                                                                                                                                                     | __ n/a__ |
| 29 |                                  |     |                                                                                                                                                                                                                                                                                                                                                          |          |
| 30 |                                  |     |                                                                                                                                                                                                                                                                                                                                                          |          |
| 31 |                                  |     |                                                                                                                                                                                                                                                                                                                                                          |          |

### 32 **Methods: Data collection, management, and analysis**

|    |                         |     |                                                                                                                                                                                                                                                                                                                                                                                                              |                     |
|----|-------------------------|-----|--------------------------------------------------------------------------------------------------------------------------------------------------------------------------------------------------------------------------------------------------------------------------------------------------------------------------------------------------------------------------------------------------------------|---------------------|
| 33 |                         |     |                                                                                                                                                                                                                                                                                                                                                                                                              |                     |
| 34 | Data collection methods | 18a | Plans for assessment and collection of outcome, baseline, and other trial data, including any related processes to promote data quality (eg, duplicate measurements, training of assessors) and a description of study instruments (eg, questionnaires, laboratory tests) along with their reliability and validity, if known. Reference to where data collection forms can be found, if not in the protocol | __ 13-19, Table 2__ |
| 35 |                         |     |                                                                                                                                                                                                                                                                                                                                                                                                              |                     |
| 36 |                         |     |                                                                                                                                                                                                                                                                                                                                                                                                              |                     |
| 37 |                         |     |                                                                                                                                                                                                                                                                                                                                                                                                              |                     |
| 38 |                         |     |                                                                                                                                                                                                                                                                                                                                                                                                              |                     |
| 39 |                         | 18b | Plans to promote participant retention and complete follow-up, including list of any outcome data to be collected for participants who discontinue or deviate from intervention protocols                                                                                                                                                                                                                    | __ 19-20__          |
| 40 |                         |     |                                                                                                                                                                                                                                                                                                                                                                                                              |                     |
| 41 |                         |     |                                                                                                                                                                                                                                                                                                                                                                                                              |                     |
| 42 |                         |     |                                                                                                                                                                                                                                                                                                                                                                                                              |                     |
| 43 |                         |     |                                                                                                                                                                                                                                                                                                                                                                                                              |                     |
| 44 |                         |     |                                                                                                                                                                                                                                                                                                                                                                                                              |                     |
| 45 |                         |     |                                                                                                                                                                                                                                                                                                                                                                                                              |                     |
| 46 |                         |     |                                                                                                                                                                                                                                                                                                                                                                                                              |                     |
| 47 |                         |     |                                                                                                                                                                                                                                                                                                                                                                                                              |                     |
| 48 |                         |     |                                                                                                                                                                                                                                                                                                                                                                                                              |                     |
| 49 |                         |     |                                                                                                                                                                                                                                                                                                                                                                                                              |                     |

|    |                                 |     |                                                                                                                                                                                                                                                                                                                                       |         |
|----|---------------------------------|-----|---------------------------------------------------------------------------------------------------------------------------------------------------------------------------------------------------------------------------------------------------------------------------------------------------------------------------------------|---------|
| 1  |                                 |     |                                                                                                                                                                                                                                                                                                                                       |         |
| 2  |                                 |     |                                                                                                                                                                                                                                                                                                                                       |         |
| 3  | Data management                 | 19  | Plans for data entry, coding, security, and storage, including any related processes to promote data quality (eg, double data entry; range checks for data values). Reference to where details of data management procedures can be found, if not in the protocol                                                                     | __21__  |
| 4  |                                 |     |                                                                                                                                                                                                                                                                                                                                       |         |
| 5  |                                 |     |                                                                                                                                                                                                                                                                                                                                       |         |
| 6  |                                 |     |                                                                                                                                                                                                                                                                                                                                       |         |
| 7  | Statistical methods             | 20a | Statistical methods for analysing primary and secondary outcomes. Reference to where other details of the statistical analysis plan can be found, if not in the protocol                                                                                                                                                              | __20__  |
| 8  |                                 |     |                                                                                                                                                                                                                                                                                                                                       |         |
| 9  |                                 |     |                                                                                                                                                                                                                                                                                                                                       |         |
| 10 |                                 | 20b | Methods for any additional analyses (eg, subgroup and adjusted analyses)                                                                                                                                                                                                                                                              | __20__  |
| 11 |                                 |     |                                                                                                                                                                                                                                                                                                                                       |         |
| 12 |                                 | 20c | Definition of analysis population relating to protocol non-adherence (eg, as randomised analysis), and any statistical methods to handle missing data (eg, multiple imputation)                                                                                                                                                       | __20__  |
| 13 |                                 |     |                                                                                                                                                                                                                                                                                                                                       |         |
| 14 |                                 |     |                                                                                                                                                                                                                                                                                                                                       |         |
| 15 |                                 |     |                                                                                                                                                                                                                                                                                                                                       |         |
| 16 | <b>Methods: Monitoring</b>      |     |                                                                                                                                                                                                                                                                                                                                       |         |
| 17 |                                 |     |                                                                                                                                                                                                                                                                                                                                       |         |
| 18 | Data monitoring                 | 21a | Composition of data monitoring committee (DMC); summary of its role and reporting structure; statement of whether it is independent from the sponsor and competing interests; and reference to where further details about its charter can be found, if not in the protocol. Alternatively, an explanation of why a DMC is not needed | __21__  |
| 19 |                                 |     |                                                                                                                                                                                                                                                                                                                                       |         |
| 20 |                                 |     |                                                                                                                                                                                                                                                                                                                                       |         |
| 21 |                                 |     |                                                                                                                                                                                                                                                                                                                                       |         |
| 22 |                                 |     |                                                                                                                                                                                                                                                                                                                                       |         |
| 23 |                                 | 21b | Description of any interim analyses and stopping guidelines, including who will have access to these interim results and make the final decision to terminate the trial                                                                                                                                                               | __n/a__ |
| 24 |                                 |     |                                                                                                                                                                                                                                                                                                                                       |         |
| 25 |                                 |     |                                                                                                                                                                                                                                                                                                                                       |         |
| 26 | Harms                           | 22  | Plans for collecting, assessing, reporting, and managing solicited and spontaneously reported adverse events and other unintended effects of trial interventions or trial conduct                                                                                                                                                     | __n/a__ |
| 27 |                                 |     |                                                                                                                                                                                                                                                                                                                                       |         |
| 28 |                                 |     |                                                                                                                                                                                                                                                                                                                                       |         |
| 29 | Auditing                        | 23  | Frequency and procedures for auditing trial conduct, if any, and whether the process will be independent from investigators and the sponsor                                                                                                                                                                                           | __n/a__ |
| 30 |                                 |     |                                                                                                                                                                                                                                                                                                                                       |         |
| 31 |                                 |     |                                                                                                                                                                                                                                                                                                                                       |         |
| 32 |                                 |     |                                                                                                                                                                                                                                                                                                                                       |         |
| 33 | <b>Ethics and dissemination</b> |     |                                                                                                                                                                                                                                                                                                                                       |         |
| 34 |                                 |     |                                                                                                                                                                                                                                                                                                                                       |         |
| 35 | Research ethics approval        | 24  | Plans for seeking research ethics committee/institutional review board (REC/IRB) approval                                                                                                                                                                                                                                             | __22__  |
| 36 |                                 |     |                                                                                                                                                                                                                                                                                                                                       |         |
| 37 |                                 |     |                                                                                                                                                                                                                                                                                                                                       |         |
| 38 | Protocol amendments             | 25  | Plans for communicating important protocol modifications (eg, changes to eligibility criteria, outcomes, analyses) to relevant parties (eg, investigators, REC/IRBs, trial participants, trial registries, journals, regulators)                                                                                                      | __n/a__ |
| 39 |                                 |     |                                                                                                                                                                                                                                                                                                                                       |         |
| 40 |                                 |     |                                                                                                                                                                                                                                                                                                                                       |         |
| 41 |                                 |     |                                                                                                                                                                                                                                                                                                                                       |         |
| 42 |                                 |     |                                                                                                                                                                                                                                                                                                                                       |         |
| 43 |                                 |     |                                                                                                                                                                                                                                                                                                                                       |         |
| 44 |                                 |     |                                                                                                                                                                                                                                                                                                                                       |         |
| 45 |                                 |     |                                                                                                                                                                                                                                                                                                                                       |         |
| 46 |                                 |     |                                                                                                                                                                                                                                                                                                                                       |         |
| 47 |                                 |     |                                                                                                                                                                                                                                                                                                                                       |         |
| 48 |                                 |     |                                                                                                                                                                                                                                                                                                                                       |         |
| 49 |                                 |     |                                                                                                                                                                                                                                                                                                                                       |         |

|    |                               |     |                                                                                                                                                                                                                                                                                     |                             |
|----|-------------------------------|-----|-------------------------------------------------------------------------------------------------------------------------------------------------------------------------------------------------------------------------------------------------------------------------------------|-----------------------------|
| 1  |                               |     |                                                                                                                                                                                                                                                                                     |                             |
| 2  |                               |     |                                                                                                                                                                                                                                                                                     |                             |
| 3  | Consent or assent             | 26a | Who will obtain informed consent or assent from potential trial participants or authorised surrogates, and how (see Item 32)                                                                                                                                                        | <u>22</u>                   |
| 4  |                               |     |                                                                                                                                                                                                                                                                                     |                             |
| 5  |                               |     |                                                                                                                                                                                                                                                                                     |                             |
| 6  |                               | 26b | Additional consent provisions for collection and use of participant data and biological specimens in ancillary studies, if applicable                                                                                                                                               | <u>n/a</u>                  |
| 7  |                               |     |                                                                                                                                                                                                                                                                                     |                             |
| 8  |                               |     |                                                                                                                                                                                                                                                                                     |                             |
| 9  | Confidentiality               | 27  | How personal information about potential and enrolled participants will be collected, shared, and maintained in order to protect confidentiality before, during, and after the trial                                                                                                | <u>22</u>                   |
| 10 |                               |     |                                                                                                                                                                                                                                                                                     |                             |
| 11 |                               |     |                                                                                                                                                                                                                                                                                     |                             |
| 12 | Declaration of interests      | 28  | Financial and other competing interests for principal investigators for the overall trial and each study site                                                                                                                                                                       | <u>26</u>                   |
| 13 |                               |     |                                                                                                                                                                                                                                                                                     |                             |
| 14 |                               |     |                                                                                                                                                                                                                                                                                     |                             |
| 15 | Access to data                | 29  | Statement of who will have access to the final trial dataset, and disclosure of contractual agreements that limit such access for investigators                                                                                                                                     | <u>26</u>                   |
| 16 |                               |     |                                                                                                                                                                                                                                                                                     |                             |
| 17 |                               |     |                                                                                                                                                                                                                                                                                     |                             |
| 18 | Ancillary and post-trial care | 30  | Provisions, if any, for ancillary and post-trial care, and for compensation to those who suffer harm from trial participation                                                                                                                                                       | <u>n/a</u>                  |
| 19 |                               |     |                                                                                                                                                                                                                                                                                     |                             |
| 20 |                               |     |                                                                                                                                                                                                                                                                                     |                             |
| 21 | Dissemination policy          | 31a | Plans for investigators and sponsor to communicate trial results to participants, healthcare professionals, the public, and other relevant groups (eg, via publication, reporting in results databases, or other data sharing arrangements), including any publication restrictions | <u>22</u>                   |
| 22 |                               |     |                                                                                                                                                                                                                                                                                     |                             |
| 23 |                               |     |                                                                                                                                                                                                                                                                                     |                             |
| 24 |                               |     |                                                                                                                                                                                                                                                                                     |                             |
| 25 |                               |     |                                                                                                                                                                                                                                                                                     |                             |
| 26 |                               | 31b | Authorship eligibility guidelines and any intended use of professional writers                                                                                                                                                                                                      | <u>n/a</u>                  |
| 27 |                               |     |                                                                                                                                                                                                                                                                                     |                             |
| 28 |                               | 31c | Plans, if any, for granting public access to the full protocol, participant-level dataset, and statistical code                                                                                                                                                                     | <u>26</u>                   |
| 29 |                               |     |                                                                                                                                                                                                                                                                                     |                             |
| 30 | <b>Appendices</b>             |     |                                                                                                                                                                                                                                                                                     |                             |
| 31 |                               |     |                                                                                                                                                                                                                                                                                     |                             |
| 32 | Informed consent materials    | 32  | Model consent form and other related documentation given to participants and authorised surrogates                                                                                                                                                                                  | <u>supplementary file 2</u> |
| 33 |                               |     |                                                                                                                                                                                                                                                                                     |                             |
| 34 |                               |     |                                                                                                                                                                                                                                                                                     |                             |
| 35 | Biological specimens          | 33  | Plans for collection, laboratory evaluation, and storage of biological specimens for genetic or molecular analysis in the current trial and for future use in ancillary studies, if applicable                                                                                      | <u>n/a</u>                  |
| 36 |                               |     |                                                                                                                                                                                                                                                                                     |                             |
| 37 |                               |     |                                                                                                                                                                                                                                                                                     |                             |

\*It is strongly recommended that this checklist be read in conjunction with the SPIRIT 2013 Explanation & Elaboration for important clarification on the items. Amendments to the protocol should be tracked and dated. The SPIRIT checklist is copyrighted by the SPIRIT Group under the Creative Commons "[Attribution-NonCommercial-NoDerivs 3.0 Unported](https://creativecommons.org/licenses/by-nc-nd/3.0/)" license.

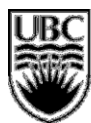

a place of mind  
THE UNIVERSITY OF BRITISH COLUMBIA

## Consent Form

### **Title: HAT TRICK: Examining the feasibility of a gender-sensitive intervention focused on physical activity, healthy eating and connectedness in male hockey fans**

#### **Lead Investigators:**

Dr. Cristina Caperchione, School of Health and Exercise Sciences, University of British Columbia, Kelowna 250 807 9679

#### **Co-Investigators:**

Dr. Joan Bottorff, Inst. For Healthy Living and Chronic Disease Prevention, University of British Columbia, Kelowna 250 807 8627

Dr. John Oliffe, School of Nursing, University of British Columbia, Vancouver 604 822-7638

Dr. Steven Johnson, Centre for Nursing and Health Studies, Athabasca University, Athabasca 877 848-6903

Dr. Kate Hunt, School of Public Health Sciences Unit, University of Glasgow, Glasgow 0 141 353-7552

Paul Sharp, School of Health and Exercise Sciences, University of British Columbia, Kelowna 250-807-9979

#### **Funding**

This study is funded by the Canadian Cancer Society Research Institute.

#### **Purpose of the study**

The purpose of this research is to evaluate the feasibility of the HAT TRICK Program, a program targeting physical activity, healthy eating and connectedness in men living in Kelowna, BC. The intervention will be delivered in connection with the Kelowna Rockets Hockey team.

#### **Eligibility**

You are being invited to voluntarily take part in this study because you are a man over the age of 35 years, residing in the Okanagan Region, who accumulates less than 150 minutes of moderate to vigorous physical activity a week, who has a Body Mass Index (BMI) greater than 25kg/m<sup>2</sup>, and a pant size greater than 38”.

#### **Study Procedures**

As a participant of this research project you will be invited to participate in twelve 90-minute weekly sessions, provide feedback on aspects of the program, and complete three assessment periods (baseline, 12-week, and 9-month follow-up). Weekly sessions will include a physical activity component, nutrition component, and behavior change component. Participants will be encouraged to make gradual changes to their lifestyle with the goal of improving overall health and well-being. Throughout the program, presentations will be given from local health professionals (e.g., nutritionist, fitness trainer), Kelowna Rockets staff and players, as well as other community personalities.

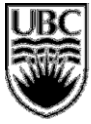

a place of mind  
THE UNIVERSITY OF BRITISH COLUMBIA

1  
2  
3  
4  
5 Assessment sessions will be held at a convenient location. These assessment periods will last up to 1.5  
6 hours. At these assessment periods, you will be asked to complete a brief questionnaires about your;  
7 physical activity and dietary behaviours, social relatedness, general health and well-being questions as  
8 well as general demographic information (e.g., age, education, marital status). During these times you  
9 will also be given an accelerometer and instructions on how to use the accelerometer. Accelerometers  
10 are a device for measuring your daily physical activity. It is a small, non-invasive device which is worn  
11 around your chest. You will be asked to wear this accelerometer for 7 consecutive days during all  
12 waking hours. You will also be asked to return the accelerometers to the research team after these 7  
13 days. Return instructions will be provided to you when you receive your accelerometer.  
14  
15  
16

17 Following the completion of the program you may also be asked commit an additional 1 hour of your  
18 time to participate in a semi-structured telephone interview with a member of the research team. If you  
19 are selected, a member of the research team will contact you to arrange a time that is convenient for you  
20 to conduct the interview. All telephone interviews will be audio recorded with your consent. During this  
21 interview we hope to hear about your thoughts, opinions and perceptions about the HAT TRICK  
22 Program and provide general comments about how you think the HAT TRICK Program could be  
23 improved.  
24  
25  
26

### **Potential Risks and Benefits**

27 The HAT TRICK program and data collection procedures involve no foreseeable risks or harm to you.  
28 However, you will be asked to work towards meeting the minimum recommended Canadian Physical  
29 Activity Guidelines (150minutes per week in bouts of 10 minutes or more) and depending on your initial  
30 activity levels, you will be encouraged to safely increase your physical activity levels throughout the  
31 project. Becoming physically active and progressively increasing your physical activity may potentially  
32 include some risk of injury, such as common muscle soreness or strains associated with being physically  
33 active. To limit any concerns you may have regarding these minor injuries, information about reducing  
34 this risk of injury, such as education about stretching and starting off slowly and building up your  
35 physical activity levels will be provided during the weekly sessions. Although no benefits can be  
36 guaranteed, potential benefits that may occur include; improvements in overall physical and mental  
37 health as a result of increasing your physical activity levels, improved understandings about the benefits  
38 of physical activity and other healthy lifestyle behaviours (i.e., healthy eating, stress management),  
39 increased social interaction and support.  
40  
41  
42  
43

### **Confidentiality**

44 Your confidentiality will be respected at all times. Only research team members and research staff will  
45 have access to data collected in this study. All documents will only be identified by a code number and  
46 kept in a locked filing cabinet and/or secure password protected system. Participants will not be  
47 identified by name in any reports or materials associated with this research. Paper copies and electronic  
48 audio files will be kept for 7 years in the Physical Health and Activity Behaviour Laboratory at UBC  
49 Okanagan. All participants taking part in the sessions will sign the confidentiality agreement at the  
50 bottom of this consent form; however, we cannot control what the other participants do with the  
51 information discussed. Findings from the study may be shared through conference presentations, articles  
52 for publication, and other media outlets. An electronic or print copy of the research report will be  
53 available to you on request.  
54  
55  
56  
57  
58  
59

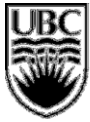

a place of mind  
THE UNIVERSITY OF BRITISH COLUMBIA

### **Contact for information about the study**

If you have any questions or would like additional information, please contact Dr. Cristina Caperchione at 250-807-9679.

### **Contact for concerns about the rights of research participants**

If you have any concerns about your treatment or rights as a research participant and/or your experiences while participating in this study you may contact the Research Participant Complaint Line in the UBC Office of Research Services at 1-877-822-8598 or the UBC Okanagan Research Services Office at 250-807-8832. It is also possible to contact the Research Participant Complaint Line by email ([RSIL@ors.ubc.ca](mailto:RSIL@ors.ubc.ca)).

### **Consent**

Your participation is entirely voluntary. You may refuse to participate or withdraw at any time without penalty or consequence. If you choose to participate and then decide to withdraw at a later time, you have the right to request the withdrawal of your information collected during the study. This request will be respected to the extent possible.

By signing this consent form, you are agreeing to participate in all study protocols. By signing this consent form you are acknowledging that you have received a signed copy of the consent form for your records. By signing this consent form, you do not waive any of your legal rights.

### **Consent**

I have read and understood the information on this consent form and voluntarily consent to participate in this study. I have had a chance to ask questions about the study and my involvement in it and have received a copy of the consent form.

\_\_\_\_\_  
Participant's Name (please print)

\_\_\_\_\_  
Participant's Signature

\_\_\_\_\_  
Date

### **Confidentiality Agreement**

I agree to respect the confidentiality of all program participants. This means I will not discuss participants' personal information with anyone outside of this program.

\_\_\_\_\_  
Participant's Name (please print)

\_\_\_\_\_  
Participant's Signature

\_\_\_\_\_  
Date



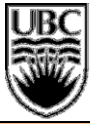

a place of mind  
THE UNIVERSITY OF BRITISH COLUMBIA

### Contact for a Follow-up Interview

Upon completion of the program, would you be interested in taking part in a 1-hour semi-structured telephone interview with a member of the research team regarding your thoughts, opinions, and perceptions of the HAT TRICK Program?

Yes, I would be interested in taking part in a telephone interview.

No, I would not be interested in taking part in a telephone interview.

\_\_\_\_\_  
Participant's Name (please print)

\_\_\_\_\_  
Participant's Signature

\_\_\_\_\_  
Date

\_\_\_\_\_  
Telephone Number

\_\_\_\_\_  
Email Address

### Contact for Future Studies

Would you like to be contacted in the future about other studies?

Yes, I would like to receive information about future studies on men's health and physical activity.

No, I would not like to receive information about future studies.

\_\_\_\_\_  
Participant's Name (please print)

\_\_\_\_\_  
Participant's Signature

\_\_\_\_\_  
Date

# BMJ Open

**The HAT TRICK program for improving physical activity, healthy eating and connectedness among overweight, inactive men: Study protocol of a pragmatic feasibility trial**

|                                 |                                                                                                                                                                                                                                                                                                                                                                                                                                                                                                                    |
|---------------------------------|--------------------------------------------------------------------------------------------------------------------------------------------------------------------------------------------------------------------------------------------------------------------------------------------------------------------------------------------------------------------------------------------------------------------------------------------------------------------------------------------------------------------|
| Journal:                        | <i>BMJ Open</i>                                                                                                                                                                                                                                                                                                                                                                                                                                                                                                    |
| Manuscript ID                   | bmjopen-2017-016940.R1                                                                                                                                                                                                                                                                                                                                                                                                                                                                                             |
| Article Type:                   | Protocol                                                                                                                                                                                                                                                                                                                                                                                                                                                                                                           |
| Date Submitted by the Author:   | 23-May-2017                                                                                                                                                                                                                                                                                                                                                                                                                                                                                                        |
| Complete List of Authors:       | Caperchione, Cristina; University of British Columbia, School of Health and Exercise Sciences<br>Bottorff, Joan; University of British Columbia Okanagan,<br>Olfiffe, John; University of British Columbia<br>Johnson, Steven; Athabasca University,<br>Hunt, Kate; University of Glasgow<br>Sharp, Paul; University of British Columbia,<br>Fitzpatrick, Kayla; University of British Columbia Okanagan<br>Price, Ryley; University of British Columbia Okanagan<br>Goldenberg, S; University of British Columbia |
| <b>Primary Subject Heading</b>: | Public health                                                                                                                                                                                                                                                                                                                                                                                                                                                                                                      |
| Secondary Subject Heading:      | Sports and exercise medicine, Public health                                                                                                                                                                                                                                                                                                                                                                                                                                                                        |
| Keywords:                       | Men's health, masculinity, physical activity, dietary behaviors, social connectedness, overweight/obese                                                                                                                                                                                                                                                                                                                                                                                                            |
|                                 |                                                                                                                                                                                                                                                                                                                                                                                                                                                                                                                    |

SCHOLARONE™  
Manuscripts

1  
2  
3 1 **The HAT TRICK program for improving physical activity, healthy eating and**  
4  
5  
6 2 **connectedness among overweight, inactive men: Study protocol of a pragmatic**  
7  
8  
9 3 **feasibility trial**  
10  
11  
12 4

14 5 **Authors:** Cristina M. Caperchione<sup>1, 2\*</sup>, Joan L. Bottorff<sup>2, 3</sup>, John L. Oliffe<sup>4</sup>, Steven T. Johnson<sup>5</sup>,  
15  
16  
17 6 Kate Hunt<sup>6</sup>, Paul Sharp<sup>1</sup>, Kayla M. Fitzpatrick<sup>1</sup>, Ryley Price<sup>1</sup>, S. Larry Goldenberg<sup>7</sup>  
18  
19  
20 7

21  
22 8 **Author Affiliations:**  
23

24 9 <sup>1</sup>School of Health and Exercise Sciences, University of British Columbia, Kelowna, BC, Canada  
25  
26

27 10 <sup>2</sup>Institute for Healthy Living and Chronic Disease Prevention, University of British Columbia,  
28  
29  
30 11 Kelowna, BC, Canada  
31

32 12 <sup>3</sup>School of Nursing, University of British Columbia, Kelowna, BC, Canada  
33  
34

35 13 <sup>4</sup>School of Nursing, University of British Columbia, Vancouver, BC, Canada  
36  
37

38 14 <sup>5</sup>Faculty of Health Disciplines, Athabasca University, Edmonton, AB, Canada  
39  
40

41 15 <sup>6</sup>MRC/CSO Social and Public Health Sciences Unit, University of Glasgow, Glasgow, UK  
42  
43

44 16 <sup>7</sup>Canadian Men's Health Foundation and Faculty of Medicine, University of British Columbia,  
45  
46  
47 17 Vancouver, BC, Canada  
48

49 19 \*Corresponding author  
50  
51  
52 20

53  
54  
55 21 **Email Addresses:**  
56

57 22 \*CMC: [cristina.caperchione@ubc.ca](mailto:cristina.caperchione@ubc.ca)  
58  
59  
60

1  
2  
3 23 JLB: [joan.bottorff@ubc.ca](mailto:joan.bottorff@ubc.ca)  
4  
5  
6 24 JLO: [john.oliffe@nursing.ubc.ca](mailto:john.oliffe@nursing.ubc.ca)  
7  
8 25 STJ: [sjohnson@athabascau.ca](mailto:sjohnson@athabascau.ca)  
9  
10  
11 26 KH: [kate.hunt@glasgow.ac.uk](mailto:kate.hunt@glasgow.ac.uk)  
12  
13 27 PS: [paul.sharp@ubc.ca](mailto:paul.sharp@ubc.ca)  
14  
15  
16 28 KF: [kaylafitzpatrick@hotmail.ca](mailto:kaylafitzpatrick@hotmail.ca)  
17  
18 29 RP: [ryleyprice4@gmail.com](mailto:ryleyprice4@gmail.com)  
19  
20  
21 30 SLG: [l.gold@ubc.ca](mailto:l.gold@ubc.ca)  
22  
23  
24 31  
25  
26 32  
27  
28 33  
29  
30  
31 34  
32  
33 35  
34  
35  
36 36  
37  
38 37  
39  
40  
41 38  
42  
43 39  
44  
45  
46 40  
47  
48 41  
49  
50  
51 42  
52  
53 43  
54  
55  
56  
57  
58  
59  
60

44 **ABSTRACT**

45 **Introduction:** Physical activity, healthy eating, and maintaining a healthy weight are associated  
46 with reduced risk of cardiovascular disease, type 2 diabetes and cancer, and improved mental  
47 health. Despite these benefits, many men do not meet recommended physical activity  
48 guidelines and have poor eating behaviors. Many health promotion programs hold little appeal  
49 to men and consequently fail to influence men's health practices. HAT TRICK was designed as a  
50 12-week face-to-face, gender-sensitized intervention for overweight and inactive men focusing  
51 on physical activity, healthy eating and social connectedness, and delivered in collaboration  
52 with a major junior Canadian ice hockey team (age range 16-20 years). The program was  
53 implemented and evaluated to assess its feasibility. This article describes the intervention  
54 design and study protocol of HAT TRICK.

55 **Methods and Analysis:** HAT TRICK participants (N=60) were men  $\geq 35$  years, residing in the  
56 Okanagan Region of British Columbia, who accumulate  $< 150$ mins of moderate to vigorous  
57 physical activity a week, with a Body Mass Index  $> 25 \text{ kg/m}^2$  and a pant waist size of  $> 38''$ . Each  
58 90-minute weekly session included targeted health education and theory-guided behavior  
59 change techniques, as well as a progressive (i.e., an increase in duration and intensity) group  
60 physical activity component. Outcome measures were collected at baseline, 12-weeks, and 9-  
61 months and included: objectively measured anthropometrics, blood pressure, heart rate,  
62 physical activity and sedentary behavior, as well as, self-reported physical activity, sedentary  
63 behavior, diet, smoking, alcohol consumption, sleep habits, risk of depression, health-related  
64 quality of life, and social connectedness. Program feasibility data (e.g., recruitment,

1  
2  
3 65 satisfaction, adherence, content delivery) was assessed at 12-weeks via interviews and self-  
4  
5  
6 66 report.

7  
8 67 **Ethics and Dissemination:** Ethical approval was obtained from the University of British  
9  
10 68 Columbia Okanagan Behavioural Research Ethics Board (#H1600736). Study findings will be  
11  
12 69 disseminated through academic meetings, peer reviewed publication, web-based podcasts,  
13  
14 70 social media, plain language summaries and co-delivered community presentations.  
15  
16

17  
18 71 **Keywords:** Men's health; masculinity; physical activity; dietary behaviors; overweight/obese;  
19  
20  
21 72 social connectedness.  
22

23 73 **Trial Registration:** ISRCTN43361357, Registered August 3, 2016  
24  
25

26 74 **Strengths and Limitations of the Study:**

- 27  
28 75 • HAT TRICK is a gender-sensitized program designed to engage 'hard to reach' men with  
29  
30 76 their health by resonating with and appealing to masculine ideals.  
31  
32  
33 77 • The HAT TRICK program has the potential to be transferred across a number of male  
34  
35 78 populations and settings, thus further increasing its reach to a large proportion of men.  
36  
37  
38 79 • This study has a robust evaluation plan, utilizing objective and subjective measures of  
39  
40 80 physical activity, and a variety of measures to assess program feasibility.  
41  
42  
43 81 • Given the exploratory nature of this feasibility study, it is limited in examining causal  
44  
45 82 effect in terms of behavior change.  
46  
47

48 83

49 84

50 85

51 86  
52  
53  
54  
55  
56  
57  
58  
59  
60

## 87 INTRODUCTION

88 Engaging in healthy lifestyle behaviors including physical activity (PA) and healthy eating  
89 to achieve and maintain a healthy body weight, can reduce the risk for developing chronic  
90 diseases such as cardiovascular disease, cancer, type 2 diabetes, depression and premature  
91 mortality [1-4]. Despite the benefits associated with these lifestyle behaviors, up to 83% of  
92 men are not meeting the recommended PA guidelines [3,5,6] (i.e., at least 150 minutes of  
93 moderate to vigorous intensity PA per week) and have poor eating behaviors [7,8]. Accordingly,  
94 the prevalence of overweight and obesity among men is on the rise and continues to grow at a  
95 disproportionate rate to their female counterparts [9]. Complicating matters is the fact that  
96 many men have proved reluctant and/or 'hard-to-reach' in healthy lifestyle and weight  
97 management programs, making disease and illness prevention initiatives difficult [10-13].

98 Traditionally, a central challenge associated with engaging men in taking more active  
99 care in their health was a perception that attention to one's health ran counter to masculine  
100 ideals of strength, self-reliance and independence [14-17]. Men often associate health  
101 promoting practices as feminine, or a sign of weakness, and consequently threatening to their  
102 status in masculine hierarchies [15,18]. Thus, many men refrain from engaging in health  
103 promotion behaviors, including attending PA, healthy eating, and weight management  
104 programs [19,20]. However, Pringle et al. [21] suggested that men's apparent detachment from  
105 healthy behaviors is an indication that typical approaches to health are unappealing and/or  
106 irrelevant to their masculine values and virtues. Previous men-centered PA and healthy eating  
107 related research [22-24] has revealed that careful consideration of 'place' (i.e., physical setting),  
108 along with a tailored approach that aligns with men's values and interests, can indeed support

1  
2  
3 109 increases in health promoting behaviors [25-27]. This work supports the notion that there is  
4  
5  
6 110 value in providing men with health promotion opportunities in venues where they participate in  
7  
8  
9 111 and/or watch sport and recreational activities [21,27,28].

10  
11 112 Recent research has highlighted the potential for professional sports teams/clubs to  
12  
13 113 attract and engage men in healthy lifestyle behaviors [29-31]. Such settings have proved a  
14  
15  
16 114 powerful draw for men due to familiar, comfortable and/or appealing environments which they  
17  
18  
19 115 offer and the socio-cultural connections men often make with particular teams and fellow  
20  
21 116 supporters in terms of loyalty, identity and belonging [27,29,32,33]. Furthermore,  
22  
23 117 professional/elite sport clubs and settings offer a unique opportunity to support men's health  
24  
25  
26 118 because they provide health promoters with a potentially large captive audience of men in an  
27  
28  
29 119 environment that plays to masculine values and virtues [21,22,29,33]. For example, the Football  
30  
31 120 Fans in Training (FFIT) intervention targeted overweight Scottish men and reported a significant  
32  
33 121 reduction in weight at 12 months post-intervention (mean weight loss of 4.95kg) [27], as well as  
34  
35  
36 122 significant positive changes in blood pressure, diet, self-reported PA and physical quality of life.  
37  
38  
39 123 This program has since been expanded to include professional soccer clubs across Europe [34]  
40  
41 124 and has been adapted to addition sports (i.e., Rugby) [35].

42  
43 125 Within this context, the gender-sensitized HAT TRICK program was designed to engage  
44  
45  
46 126 men with their health by resonating with and appealing to masculine ideals. Its delivery model  
47  
48  
49 127 is founded on the strong collaboration with the Kelowna Rockets Hockey Team, a major junior  
50  
51 128 ice hockey team within the Canadian Hockey League (CHL) [36]. Garnering the social-cultural  
52  
53  
54 129 connections that men often cultivate with particular sports teams can be a 'lynchpin' to  
55  
56 130 engaging men in healthful behaviors in that this approach recognises the interests and  
57  
58  
59  
60



1  
2  
3 131 preferences of men, while fostering an environment that promotes a sense of identity,  
4  
5  
6 132 camaraderie and healthy living. This paper describes the intervention design and  
7  
8 133 methodological protocols of HAT TRICK.  
9

10 134

## 11 135 **METHODS AND ANALYSIS**

### 12 136 **Objectives**

13  
14  
15  
16  
17  
18  
19 137 The specific objectives of the HAT TRICK study were to:

- 20  
21 138 1) Determine feasibility and acceptability of HAT TRICK, a health promotion program  
22  
23 139 focused on PA, healthy eating and connectedness for inactive, overweight men.  
24  
25  
26 140 2) Estimate effectiveness in terms of changes over time in PA, sedentary behavior, dietary  
27  
28 141 behaviors, weight, smoking, alcohol consumption, sleep habits, risk for depression,  
29  
30 142 health-related quality of life (HRQoL) and social connectedness.  
31  
32  
33 143 3) Utilise findings to refine the program and inform the development of a future large scale  
34  
35 144 randomised control trial (RCT).  
36  
37  
38

### 39 145 **Study design**

40  
41 146 This study protocol was prepared according to Standard Protocol Items:  
42  
43  
44 147 Recommendations for Interventional Trials (SPIRIT) [37]. This study utilised a quasi-  
45  
46 148 experimental, pre-post test design to evaluate the feasibility and acceptability of a men's health  
47  
48 149 promotion program focused on PA, healthy eating, and social connectedness. Data collection  
49  
50 150 occurred at baseline, 12-weeks, and 9-months follow-up. The study period extends from August  
51  
52 151 2016 – May 2018. Recruitment occurred in three phases, corresponding with the delivery of  
53  
54  
55 152 three 12-week HAT TRICK sessions: Phase 1 recruitment period occurred in November 2016;  
56  
57  
58  
59  
60

1  
2  
3 153 phase 2 recruitment period occurred in January 2017; and, phase 3 recruitment will begin in  
4  
5  
6 154 August 2017. Figure 1 provides a flow diagram for the HAT TRICK protocol. Figure 2 provides  
7  
8  
9 155 Standard Protocol Items: Recommendations for Interventional Trials (SPIRIT) figure. (Please see  
10  
11 156 Supplementary File 1 for SPIRIT Checklist).

### 13 157 **Study population, eligibility and recruitment**

16 158 A total of 60 participants (20 participants x 3 groups) were recruited for this feasibility  
17  
18 159 trial. This sample size is appropriate for feasibility trials which aim to provide an estimate of the  
19  
20  
21 160 parameters (i.e., identifying/recruiting participants; practicality of delivery, standard deviation  
22  
23 161 of a primary outcome measure to estimate sample size) needed to design and conduct a  
24  
25  
26 162 sufficiently powered RCT [22,38,39]. To be eligible for the study, participants had to be men  
27  
28 163 over the age of 35 years, reside in the Okanagan Region of British Columbia (BC), Canada,  
29  
30  
31 164 accumulate less than 150 minutes of PA per week, have a body mass index (BMI) of over  
32  
33 165 25kg/m<sup>2</sup> and a pant waist size of 38" or greater. It was not a requirement of the program to be  
34  
35  
36 166 able to skate or play hockey.

37  
38 167 A variety of recruitment strategies were utilised, including: 1) communication avenues  
39  
40  
41 168 via the Kelowna Rockets Hockey Team (e.g., poster advertising at home games, Rockets  
42  
43 169 website, newsletters to season tickets holders, game day intercom announcements,  
44  
45  
46 170 recruitment/information booth at home games); 2) local media, including print newspaper and  
47  
48 171 television and radio broadcasts; 3) email and print communication via local male dominated  
49  
50  
51 172 community organizations (e.g., Okanagan Men's Shed); 4) social media, including Facebook,  
52  
53 173 Castanet, Kijiji, and Kelowna Now (community events website); and 5) Poster advertisements at  
54  
55  
56 174 local community centers, ice hockey arenas, coffee shops, pubs and bars, and large hardware  
57  
58  
59  
60

1  
2  
3 175 and automotive commercial entities (e.g., Canadian Tire). Prior to groups 2 and 3, word of  
4  
5  
6 176 mouth was an additional recruitment strategy. Lastly, a project specific website  
7  
8 177 ([www.hattrick.ok.ubc.ca](http://www.hattrick.ok.ubc.ca)) with additional information about the program, including eligibility  
9  
10  
11 178 criteria and how to sign up, was also used to recruit participants.

12  
13 179 Interested individuals were encouraged to contact the research team to confirm their  
14  
15  
16 180 eligibility. Those confirmed eligible were asked to complete a Physical Activity Readiness  
17  
18 181 Questionnaire (PAR-Q+) [40], a medical screening tool which has been recommended for use in  
19  
20  
21 182 exercise related interventions and RCTs [41]. All completed PAR-Q+ were reviewed by a  
22  
23 183 Certified Exercise Physiologist [42] and individuals who required further medical screening were  
24  
25  
26 184 informed and invited to gain medical clearance from a general medical practitioner (i.e., family  
27  
28 185 doctor) in order to participate in the study. Individuals were accepted on a 'first come first  
29  
30  
31 186 serve' basis with additional individuals being placed on a waitlist and contact list for the next  
32  
33  
34 187 available session.

### 35 36 188 **HAT TRICK Intervention**

37  
38 189 HAT TRICK is a term synonymous with the achievement of a single hockey player scoring  
39  
40  
41 190 three goals in one hockey game. Although the term has its origins in hockey, it is also used in  
42  
43 191 other sports. For example, a soccer player who scores three goals in one game or a football  
44  
45  
46 192 player who scores three touchdowns in one game may also claim that they achieved a 'hat  
47  
48 193 trick'. Thus, the HAT TRICK program follows this same logic and focuses on three goals including  
49  
50  
51 194 enhancing PA, healthy eating, and social connectedness. The program was tailored for men  
52  
53 195 using evidence-based research concerning men's health behaviours [27,43] and was guided by  
54  
55  
56 196 theoretical underpinnings associated with behavior change, specifically incorporating  
57  
58  
59  
60

1  
2  
3 197 components of the Social Cognitive Theory [44,45], Self-Determination Theory [46] and  
4  
5  
6 198 masculinities [14,17]. It was also informed by formative consultations with the men, previously  
7  
8  
9 199 conducted by the research team [23,47]. Gender-related strategies found to be successful in  
10  
11 200 influencing men's health behaviors were integrated into the design of the program including  
12  
13 201 men's preferences for activity based approaches, self-monitoring and friendly competition,  
14  
15  
16 202 while providing space for male comradery to foster group support, normalise practices related  
17  
18 203 to health, and mobilise men in regaining fitness and valued masculine identities and activities  
19  
20  
21 204 [14,17]. All resources were consistent with a masculine look and feel, and provided clear,  
22  
23  
24 205 positive, and direct messaging around PA, healthy eating, and social connectedness [43,48]. For  
25  
26 206 example, consideration was given to the use of colours (e.g., dark tones and stark contrasts),  
27  
28 207 images (e.g., average men performing PA), language (e.g., "power foods"), and tone (e.g., "I  
29  
30  
31 208 don't need to eat like a rabbit or live at the gym to improve my health").

32  
33 209 HAT TRICK consists of 12 weekly, 90-minute face-to-face group sessions delivered at the  
34  
35  
36 210 local hockey arena, the home facility to the Kelowna Rockets. Each group session included a  
37  
38 211 'locker room' component with an ice hockey related-theme used to frame health-related  
39  
40  
41 212 education and information regarding PA, healthy eating and behavior change techniques (i.e.,  
42  
43 213 goal setting, self-monitoring, social support), whilst simultaneously promoting enjoyment and  
44  
45  
46 214 increased social connectedness through an interactive and informal style of learning. For  
47  
48 215 instance, to enhance social connectedness, facilitators aimed to foster a sense of teamwork and  
49  
50  
51 216 comradery among the men through group activities and competition. Men were encouraged to  
52  
53  
54 217 share contact information and meet outside of the program as well as foster friendly  
55  
56 218 competition by challenging each other to meet their PA and healthy eating goals. Participants  
57  
58  
59  
60

219 were introduced to a variety of activities and guided through a progressive (i.e., increase  
 220 duration and intensity over time) PA program within the facility using the team gym, the  
 221 concession loop, and spectator stands. Weekly PA and healthy eating challenges were  
 222 introduced to encourage men to integrate what they learned to their daily life [49-51]. Table 1  
 223 provides a detailed description of the weekly locker room content, PA, and challenges provided  
 224 to the men.

225 **Table 1.** Weekly Outline of HAT TRICK

| Locker Room Education                                                                                                                                                                                                              | Group PA                                                                                                                                                                                                                                                                                                                                             | Weekly Challenge                                                                                                                                                                                  |
|------------------------------------------------------------------------------------------------------------------------------------------------------------------------------------------------------------------------------------|------------------------------------------------------------------------------------------------------------------------------------------------------------------------------------------------------------------------------------------------------------------------------------------------------------------------------------------------------|---------------------------------------------------------------------------------------------------------------------------------------------------------------------------------------------------|
| Week 1: Pre Game                                                                                                                                                                                                                   |                                                                                                                                                                                                                                                                                                                                                      |                                                                                                                                                                                                   |
| <ul style="list-style-type: none"> <li>• Program introduction</li> <li>• Why HAT TRICK?</li> <li>• The first step</li> <li>• Take stock of current activities</li> </ul>                                                           | <ul style="list-style-type: none"> <li>• Introduction to Fitbits</li> <li>• Hockey area facility tour</li> <li>• Intermission               <ul style="list-style-type: none"> <li>○ Meet and greet with hockey team</li> </ul> </li> </ul>                                                                                                          | On every day this week: <ul style="list-style-type: none"> <li>• Record how many steps you do</li> <li>• Record everything that you eat and drink</li> </ul>                                      |
| Week 2: Face Off                                                                                                                                                                                                                   |                                                                                                                                                                                                                                                                                                                                                      |                                                                                                                                                                                                   |
| <ul style="list-style-type: none"> <li>• Change a bit</li> <li>• Break the cycle</li> <li>• Top 5 tips for success</li> </ul>                                                                                                      | <ul style="list-style-type: none"> <li>• Activities around hockey arena               <ul style="list-style-type: none"> <li>○ Climb bleachers, walk the loop, seat dips</li> </ul> </li> <li>• Intermission               <ul style="list-style-type: none"> <li>○ Fitbit usage and barriers</li> <li>○ Step recommendations</li> </ul> </li> </ul> | On at least <b>3</b> days of the week: <ul style="list-style-type: none"> <li>• walk an extra 1,500 steps (from baseline value)</li> <li>• Choose water instead of a sugary drink</li> </ul>      |
| Week 3: Power Play                                                                                                                                                                                                                 |                                                                                                                                                                                                                                                                                                                                                      |                                                                                                                                                                                                   |
| <ul style="list-style-type: none"> <li>• HAT TRICK to healthy eating: carbs, proteins, and fats</li> <li>• Top 6 healthy eating tips</li> <li>• Power food swaps</li> </ul>                                                        | <ul style="list-style-type: none"> <li>• Hockey team training gym               <ul style="list-style-type: none"> <li>○ Fundamental activities with Athletic Trainer</li> <li>○ Circuit-style workout</li> </ul> </li> <li>• Intermission               <ul style="list-style-type: none"> <li>○ Discuss week 2 challenge</li> </ul> </li> </ul>    | On at least <b>3</b> days of the week: <ul style="list-style-type: none"> <li>• walk an extra 1,500 steps (from baseline value)</li> <li>• Start your morning with a healthy breakfast</li> </ul> |
| Week 4: Tic Tac Toe                                                                                                                                                                                                                |                                                                                                                                                                                                                                                                                                                                                      |                                                                                                                                                                                                   |
| <ul style="list-style-type: none"> <li>• Size: Then and now</li> <li>• Handy portion guide</li> <li>• Top 7 tips for dining out</li> <li>• Rethink beer o'clock</li> <li>• Top 6 tips for keeping the beer gut in check</li> </ul> | <ul style="list-style-type: none"> <li>• Ball hockey game               <ul style="list-style-type: none"> <li>○ Two periods of 15 minutes</li> </ul> </li> <li>• Intermission:               <ul style="list-style-type: none"> <li>○ Discuss week 3 challenge</li> </ul> </li> </ul>                                                               | On at least <b>5</b> days of the week: <ul style="list-style-type: none"> <li>• walk an extra 1,500 steps (from baseline value)</li> <li>• Use the handy portion guide to plan a meal</li> </ul>  |
| Week 5: Long Change                                                                                                                                                                                                                |                                                                                                                                                                                                                                                                                                                                                      |                                                                                                                                                                                                   |
| <ul style="list-style-type: none"> <li>• Active living 101</li> </ul>                                                                                                                                                              | <ul style="list-style-type: none"> <li>• Hockey team training gym</li> </ul>                                                                                                                                                                                                                                                                         | On at least <b>5</b> days of the week:                                                                                                                                                            |

|                                                                                                                                                                                                                                                       |                                                                                                                                                                                                                                                                            |                                                                                                                                                                                                          |
|-------------------------------------------------------------------------------------------------------------------------------------------------------------------------------------------------------------------------------------------------------|----------------------------------------------------------------------------------------------------------------------------------------------------------------------------------------------------------------------------------------------------------------------------|----------------------------------------------------------------------------------------------------------------------------------------------------------------------------------------------------------|
| <ul style="list-style-type: none"> <li>• HAT TRICK to active living</li> <li>• Canada PA Guidelines</li> <li>• Recruit a deep bench (i.e., elicit social support)</li> </ul>                                                                          | <ul style="list-style-type: none"> <li>○ Fundamental activities with Athletic Trainer</li> <li>○ Circuit-style workout</li> <li>• Intermission</li> <li>○ Discuss week 4 challenge</li> </ul>                                                                              | <ul style="list-style-type: none"> <li>• walk an extra 1,500 steps (from baseline value)</li> <li>• Choose water instead of a sugary drink</li> </ul>                                                    |
| Week 6: Neutral Zone                                                                                                                                                                                                                                  |                                                                                                                                                                                                                                                                            |                                                                                                                                                                                                          |
| <ul style="list-style-type: none"> <li>• Energy balance</li> <li>• The 80/20 rule (i.e., 80% healthy eating/20% anything foods)</li> <li>• Top 8 keys to weight loss</li> <li>• Drink wisely (i.e., choose water instead of sugary drinks)</li> </ul> | <ul style="list-style-type: none"> <li>• Exercise at a moderate intensity (3 bouts of 15 minutes)- Include short intervals of higher intensity</li> <li>• Intermission: <ul style="list-style-type: none"> <li>○ Discuss week 5 challenge</li> </ul> </li> </ul>           | <p>On at least <b>3</b> days of the week:</p> <ul style="list-style-type: none"> <li>• walk an extra 3,000 steps (from baseline value)</li> <li>• Apply the 80/20 rule</li> </ul>                        |
| Week 7: Penalty Kill                                                                                                                                                                                                                                  |                                                                                                                                                                                                                                                                            |                                                                                                                                                                                                          |
| <ul style="list-style-type: none"> <li>• SMART goals</li> <li>• Keep your stick on the ice (i.e. relapse prevention)</li> <li>• Top 6 relapse prevention strategies</li> <li>• Top 6 healthy snacking tips</li> <li>• Rewarding yourself</li> </ul>   | <ul style="list-style-type: none"> <li>• “Boot camp” style workout</li> <li>• Intermission: <ul style="list-style-type: none"> <li>○ Discuss week 6 challenge</li> </ul> </li> </ul>                                                                                       | <p>On at least <b>3</b> days of the week:</p> <ul style="list-style-type: none"> <li>• walk an extra 3,000 steps (from baseline value)</li> <li>• Choose healthy snacks options</li> </ul>               |
| Week 8: Odd Man Rush                                                                                                                                                                                                                                  |                                                                                                                                                                                                                                                                            |                                                                                                                                                                                                          |
| <ul style="list-style-type: none"> <li>• Principles of strength training</li> <li>• Circuit training</li> <li>• At home workout</li> <li>• Turning up the heat</li> </ul>                                                                             | <ul style="list-style-type: none"> <li>• Introduction to at-home bodyweight workout</li> <li>• Intermission: <ul style="list-style-type: none"> <li>○ Discuss week 7 challenge</li> </ul> </li> </ul>                                                                      | <p>On at least <b>5</b> days of the week:</p> <ul style="list-style-type: none"> <li>• walk an extra 3,000 steps (from baseline value)</li> <li>• Start your morning with a healthy breakfast</li> </ul> |
| Week 9: Icing                                                                                                                                                                                                                                         |                                                                                                                                                                                                                                                                            |                                                                                                                                                                                                          |
| <ul style="list-style-type: none"> <li>• Top 5 tips for “brocery” shopping (i.e., grocery shopping for guys)</li> <li>• Reading the fine print</li> <li>• The many names for sugar and salt</li> <li>• Product buzz words</li> </ul>                  | <ul style="list-style-type: none"> <li>• Exercise at moderate-vigorous intensity (3 bouts of 15 minutes)-15 minutes will include more vigorous intensity</li> <li>• Intermission: <ul style="list-style-type: none"> <li>○ Discuss week 8 challenge</li> </ul> </li> </ul> | <p>On at least <b>5</b> days of the week:</p> <ul style="list-style-type: none"> <li>• walk an extra 3,000 steps (from baseline value)</li> <li>• Apply the 80/20 rule</li> </ul>                        |
| Week 10: Fast Break                                                                                                                                                                                                                                   |                                                                                                                                                                                                                                                                            |                                                                                                                                                                                                          |
| <ul style="list-style-type: none"> <li>• Making healthy trades</li> <li>• The BBQ king</li> <li>• Meals on the fly</li> </ul>                                                                                                                         | <ul style="list-style-type: none"> <li>• Sport chosen by men (3 periods of 15 minutes)</li> <li>• Intermission: <ul style="list-style-type: none"> <li>○ Discuss week 9 challenge</li> </ul> </li> </ul>                                                                   | <p>On at least <b>5</b> days of the week:</p> <ul style="list-style-type: none"> <li>• walk an extra 3,000 steps (from baseline value)</li> <li>• Choose healthy snacks options</li> </ul>               |
| Week 11: Set Play                                                                                                                                                                                                                                     |                                                                                                                                                                                                                                                                            |                                                                                                                                                                                                          |
| <ul style="list-style-type: none"> <li>• Sit less</li> <li>• Top 4 stress management</li> </ul>                                                                                                                                                       | <ul style="list-style-type: none"> <li>• Resistance training session</li> <li>• Intermission:</li> </ul>                                                                                                                                                                   | <p>On at least <b>5</b> days of the week:</p> <ul style="list-style-type: none"> <li>• walk an extra 3,000 steps</li> </ul>                                                                              |

|                                |                             |                                                                                           |
|--------------------------------|-----------------------------|-------------------------------------------------------------------------------------------|
| tips                           | ○ Discuss week 10 challenge | (from baseline value)                                                                     |
| • Sleep and health             |                             | • Use the handy portion guide to plan a meal                                              |
| Week 12: He shoots, he scores! |                             |                                                                                           |
| • Highlight reel               | • Family skate and BBQ      | Be HAT TRICK healthy. Keep working towards your goals and making small lifestyle changes. |
| • Dealing with set-backs       | ○ Family and friends        |                                                                                           |
| • What's the next step?        | ○ Man of the Match (awards) |                                                                                           |
|                                | • Intermission:             |                                                                                           |
|                                | ○ Discuss week 11 challenge |                                                                                           |

226

227

228

229

230

231

232

233

234

235

236

237

238

239

240

241

242

In the initial deliveries, HAT TRICK was facilitated by research personnel trained in health promotion and behavior change techniques. However, it is anticipated that for future delivery of the program, external facilitators such as fitness professionals with relevant certifications (e.g., CSEP CPT, BCRPA Personal Trainer) or other accredited local health professionals (e.g., nutrition specialists, physical therapists), as well as individuals who have previously gone through the program, will be trained to deliver the program. In addition, hockey team personnel and community experts were invited as guest speakers/presenters for selected sessions. For example, the Rockets Athletic Therapist was brought in to lead a strength training session and the Rockets nutritionist specialist was a guest presenter for some of the nutrition education sessions. Community health professionals (e.g., fitness trainers, physiotherapist) were also involved in leading some of the group sessions. For instance, qualified local fitness professionals led the men through a circuit training session and martial arts type workouts, and a local Chef assisted with presenting and discussing healthier food options when ordering from restaurant menus. Including team 'insiders' and local professionals (i.e., Rockets personnel) provided a variety of content and activities for the men, potentially helping to build community capacity and buy-in, which is vital to future dissemination and sustainability.

1  
2  
3 243 All participants were provided with the HAT TRICK 'Playbook', a print resource manual  
4  
5  
6 244 that further summarised the key messages and signposts the resources to draw on over 12-  
7  
8 245 week program. The 'Playbook' is divided into 12 weeks and corresponds with each weekly  
9  
10 246 theme of HAT TRICK, as outlined in Table 1. It contains educational information, expressed in  
11  
12 247 simple terms using hockey-related metaphors, concerning healthy eating (i.e., information  
13  
14 248 about macro-nutrients, portion sizes, etc.) and active living (i.e., barriers and benefits to PA,  
15  
16 249 being active at home, etc.), as well as strategies for weight management and behavior change,  
17  
18 250 such as information concerning social support, self-monitoring, goal setting, and relapse  
19  
20 251 prevention. To assist with self-monitoring, participants were provided with a Fitbit Charge HR™  
21  
22 252 and PA and dietary tracking logs which are embedded in the 'Playbook'. During each week of  
23  
24 253 the program, men were encouraged and challenged to increase their step count (in graduate  
25  
26 254 increments) and non-walking PA, as well as to engage in healthy eating (e.g., increasing fruit  
27  
28 255 and vegetable consumption) and record these activities in their 'Playbook' tracking logs.  
29  
30  
31  
32  
33  
34  
35

### 36 256 **Outcome Measures**

37  
38 257 Quantitative and qualitative data collection methods were used to assess outcome and  
39  
40 258 feasibility measures. All assessments took place at the same facility where HAT TRICK was  
41  
42 259 delivered and occurred at baseline (one week prior to the start of the program), at 12-weeks  
43  
44 260 (completion of the program) and will occur again at 9-months follow-up (post-baseline).  
45  
46 261 Participants who were unable to attend the measurement session were invited to complete  
47  
48 262 measures at an agreed upon time in the Physical Health and Activity Behaviour Lab at the  
49  
50 263 University of British Columbia or at an alternative location such as their home. All measures are  
51  
52  
53  
54  
55  
56  
57  
58  
59  
60



264 described in further detail below. In addition, Table 2 provides a summary of measures and  
 265 data collection time points.

266 **Table 2.** Summary of measures and data collection time points

| Measures                              | Methods for data collection                                                   | Data collection time points |
|---------------------------------------|-------------------------------------------------------------------------------|-----------------------------|
| Demographics                          | Age, ethnicity, education, occupation, income, marital status, co-morbidities | 0 (Baseline only)           |
| Anthropometrics                       | Height, weight, waist circumference                                           | 0, 12-wks and 9-mths        |
| Physiological Measures                | Blood pressure, heart rate                                                    | 0, 12-wks and 9-mths        |
| PA levels                             | Actigraph GT3X™ accelerometer (over a 7 day-period)                           | 0, 12-wks and 9-mths        |
|                                       | Godin's Leisure Time Exercise Questionnaire (GLTEQ)                           | 0, 12-wks and 9-mths        |
| Sedentary behavior                    | Actigraph GT3X™ accelerometer (over a 7 day-period)                           | 0, 12-wks and 9-mths        |
|                                       | Marshall Sitting Questionnaire (MSQ)                                          | 0, 12-wks and 9-mths        |
| Dietary behavior                      | The Dietary Instrument for Nutrition Education Questionnaire (DINE)           | 0, 12-wks and 9-mths        |
| Other health behaviors                | 7 Day Alcohol Recall                                                          | 0, 12-wks and 9-mths        |
|                                       | Smoking and tobacco use                                                       | 0, 12-wks and 9-mths        |
|                                       | Sleep habits                                                                  | 0, 12-wks and 9-mths        |
| Psychological and physical well-being | SF-12V2 Health Survey                                                         | 0, 12-wks and 9-mths        |
|                                       | Male Depression Risk Scale (MDRS-22)                                          | 0, 12-wks and 9-mths        |
|                                       | Abbreviated Duke Social Support Index (DSSI-11)                               | 0, 12-wks and 9-mths        |
| Program                               | Satisfaction/acceptability                                                    | 12-wks (post intervention)  |

|   |                            |                             |                           |
|---|----------------------------|-----------------------------|---------------------------|
| 1 |                            |                             |                           |
| 2 |                            |                             |                           |
| 3 |                            |                             |                           |
| 4 | satisfaction/acceptability | questionnaire               | only)                     |
| 5 |                            |                             |                           |
| 6 |                            | Semi-structured telephone   | 12-wks (post intervention |
| 7 |                            | interview with participants | only)                     |

267

268 Demographics, anthropometrics and physiological measures

269 As part of the self-report questionnaire, participants were asked to report demographic  
 270 variables including; date of birth, ethnic background, level of education, marital status, chronic  
 271 disease conditions, main activity, occupation, and household income. Height (cm), weight (kg),  
 272 waist circumference (cm), blood pressure (mmHg), and heart rate (bpm) were measured by a  
 273 research team member, trained to a standard protocol, at all assessment sessions. Weight and  
 274 height was measured with the participant standing normally, with feet together and head in the  
 275 Frankfort plane, using Seca 700 mechanical balance scales and a Seca 220 measuring rod (Seca  
 276 GmbH, Hamburg). Using the National Institutes of Health protocol [52], waist circumference  
 277 was measured on the transverse plane at the top of the iliac crest using a measurement tape.  
 278 Blood pressure and heart rate was measured two times at two minutes intervals with a Life  
 279 Source Digital Deluxe One Step Blood Pressure Monitor. Participants were asked to sit quietly  
 280 for five minutes prior to the first measurement. Blood pressure was measured on the left arm  
 281 with forearm on a table, palm of the hand facing up. Participants were asked to rest the arm  
 282 comfortably at heart level, sitting with their back against the chair, legs uncrossed.

283 Physical Activity

284 PA was assessed objectively using an Actigraph GT3X™ accelerometer (ActiGraph,  
 285 Pensacola, FL) during all waking hours over seven days. The accelerometers were initialized to  
 286 record steps, inclination, and acceleration counts in tri-axial mode, using 60-second epochs

1  
2  
3 287 [53,54]. Participants were instructed to wear the accelerometer above their right hip and in-line  
4  
5  
6 288 with their right knee facing up, and to remove it during sleeping hours or for any activities  
7  
8 289 where water may be involved. The Actigraph GT3X™ is considered the ‘gold standard’ measure  
9  
10 290 of PA in adults [55] and has shown validity and reliability compared to other commercial  
11  
12 291 devices [56,57]. Established cut-off points were used to calculate daily minutes of moderate  
13  
14 292 (2,691 – 6,166 counts/min) and vigorous (>6,167 counts/min) PA while controlling for the  
15  
16 293 number of days the accelerometer was worn [56]. Moderate-to-vigorous physical activity  
17  
18 294 (MVPA) will be calculated as a sum score of weekly minutes in MVPA. Data will be included in  
19  
20 295 the analyses if there are no extreme counts (>20,000) and if data are available for at least 600  
21  
22 296 minutes wear time per day on 5 days. Participants with invalid data were asked to wear the  
23  
24 297 activity monitor for a further 7 days.  
25  
26  
27  
28  
29

30  
31 298 PA was also assessed by self-report using a modified version of the Godin Leisure Time  
32  
33 299 Exercise Questionnaire (GLTEQ) [58]. Participants were asked to indicate the frequency and  
34  
35 300 type of intensity (i.e., light, moderate, vigorous) of their daily PA per week and the duration  
36  
37 301 (minutes) of these sessions [58]. All responses will be converted to minutes and calculated in  
38  
39 302 accordance with the metabolic equivalent (MET) minutes method [59]. A cut-off point of  $\geq 600$   
40  
41 303 MET minutes will then be used to dichotomize participants as “adequately active for health  
42  
43 304 benefit” or “inadequately active” [59,60]. The GLTEQ has shown good validity and reliability  
44  
45 305 across a number of populations and settings [61-63].  
46  
47  
48  
49

#### 50 306 Sedentary Behavior

51  
52  
53 307 Accelerometers were also be used to objectively assess sedentary behavior using a 30s  
54  
55 308 epoch. Sedentary time will be determined as <100 counts/min, adjusted for non-wear time  
56  
57  
58  
59  
60

1  
2  
3 309 operationalized as at least 60 minutes of consecutive zeros [54]. In addition, sedentary  
4  
5  
6 310 behaviors was assessed by self-report using The Marshall Sitting Questionnaire (MSQ) [64]. The  
7  
8  
9 311 MSQ assesses time spent sitting on weekdays and weekend days at work, traveling and at  
10  
11 312 home. Data from the sitting time questionnaire will be used to create an estimate of total  
12  
13 313 weekday and weekend-day sitting times (min/day) by summing the time reported in each  
14  
15  
16 314 domain [64]. This measure has demonstrated reliability and validity in the adult population  
17  
18  
19 315 [64].

#### 20 21 316 Dietary Behaviors

22  
23 317 Dietary behaviors were assessed by the Dietary Instrument for Nutrition Education  
24  
25  
26 318 (DINE) questionnaire [65], a short 19-item questionnaire providing a measure of frequency of  
27  
28  
29 319 intake of different food types (i.e., fruits and vegetables) and macronutrients over the last  
30  
31 320 seven days. Composite scores will be calculated in accordance with the DINE protocol used for  
32  
33 321 total fat intake and total fiber intake, with higher scores indicating greater consumption [65].  
34  
35  
36 322 This validated instrument [65] is considered to be an acceptable alternative to more detailed  
37  
38  
39 323 diet recall questionnaires and food dairies, and was chosen for this particular study as it  
40  
41 324 focuses on food types (i.e., fruits and vegetables) associated with chronic disease prevention  
42  
43  
44 325 and management [66,67].

#### 45 46 326 Other health-related behaviors

47  
48 327 Smoking and tobacco use, alcohol consumption, and sleep habits were assessed via  
49  
50  
51 328 self-report questions [68]. Smoking status was measured using a single question, wherein  
52  
53  
54 329 participants identify as a regular smoker (daily), occasional smoker (once in a while), ex-smoker,  
55  
56  
57  
58  
59  
60

1  
2  
3 330 or non-smoker. Occasional and regular smokers were asked to report their smoking habits and  
4  
5  
6 331 quit attempts using standardized questions [68].  
7

8 332 Alcohol intake was measured using a 7-Day Alcohol Recall [69]. Participants were asked  
9  
10 333 to consider the previous 7 days and report the number of pints of beer/cider, glasses of wine,  
11  
12 334 glasses of fortified wine (e.g., Port), measures of spirits, and any other alcoholic beverages  
13  
14  
15 335 consumed each day.  
16

17  
18 336 Participants' sleeping habits were reported through average hours of sleep on a typical  
19  
20  
21 337 night [70]. Descriptive measures related to speaking with a doctor or health professional about  
22  
23 338 having difficulty sleep and being diagnosed with a sleep disorder were also collected [70].  
24

#### 25 26 339 Risk of Depression 27

28 340 Risk of depression was assessed using the Male Depression Risk Scale (MDRS-22) [71].  
29

30  
31 341 This is a 22-item Likert scale questionnaire ranging from 0 (not at all) to 7 (almost always).  
32

33 342 Participants were asked to think back over the last month and respond to each item considering  
34  
35  
36 343 how often it applies. The MDRS-22 provides a total score via the summation of all 22 items and  
37  
38 344 six subscale scores that follow six symptom domains including: emotional suppression, drug  
39  
40  
41 345 use, alcohol use, somatic symptoms, risk taking, and anger and aggression. A higher score  
42  
43 346 indicates a greater risk of depression. The MDRS-22 has demonstrated validity and reliability  
44  
45  
46 347 among men [71,72].  
47

#### 48 348 Health-related Quality of Life 49

50  
51 349 HRQoL was assessed using the Short Form Health Survey (SF-12) [73]. The SF-12 was  
52  
53 350 developed as a shorter alternative to the SF-36 [74], and it includes 12 questions and eight  
54  
55  
56 351 physical and mental health dimension scales including; physical functioning, role-physical,  
57  
58  
59  
60

1  
2  
3 352 bodily pain, general health, vitality, social function, role-emotional and mental health [73].  
4

5  
6 353 Scoring for this survey includes pre-coded numeric values that are assigned to each of the eight  
7

8  
9 354 scales and then scored from 0 to 100, with a higher score indicating better health [75]. The SF-  
10

11 355 12 is one of the most widely used HRQoL evaluation tools and has been shown to be valid and  
12

13 356 reliable in a number of populations [76-79].  
14

15  
16 357 Social Support

17  
18 358 The Abbreviated Duke Social Support Index (DSSI-11) [80] was used to assess perceived  
19

20  
21 359 social support. The DSSI is an 11-item questionnaire comprising of two sub-scales; social  
22

23 360 interaction (4 items) and social satisfaction (7 items), measured on a 4 point Likert scale. The  
24

25  
26 361 social interaction subscale asks questions regarding the number of social interactions an  
27

28 362 individual has had within the past week (e.g., *How many times during the past week did you*  
29

30  
31 363 *spend time with someone who does not live with you?* The social satisfaction subscale asks  
32

33 364 about the subjective quality of these relationships (e.g., *When you are talking with your family*  
34

35  
36 365 *or friends, do you feel you are being listened to?* The social interaction scale ranges from 4 to 12  
37

38 366 and the social satisfaction subscale ranges from 6 to 18, thus the total score for the DSSI-11  
39

40  
41 367 ranges from 10 to 30 (combination of social interactions and social satisfaction scores, with  
42

43 368 social satisfaction reverse scored before summation) with higher scores indicating a stronger  
44

45  
46 369 perception of social support [80]. The DSSI-11 has been shown to be valid and reliable in adult  
47

48 370 populations and reported to be useful for measuring social support in community-based  
49

50  
51 371 epidemiological studies [81-84].  
52

53 372 **Statistical Analysis**  
54  
55  
56  
57  
58  
59  
60

1  
2  
3 373 Descriptive analyses will be completed and presented as means and standard deviations  
4  
5  
6 374 for continuous variables and as frequencies and proportions for categorical data. Data analysis  
7  
8 375 of outcome variables including estimates of change in PA, sedentary behavior, dietary  
9  
10 376 behaviors, smoking, smoking, alcohol consumption, sleep habits, risk of depression, HRQoL, and  
11  
12 377 social support will be examined using a within subjects, repeated measures ANOVA. The level  
13  
14 378 of significance ( $\alpha$ ) will be set at 0.05. As the primary outcome is feasibility, it is not appropriate  
15  
16 379 to perform a power calculation. All analyses will be conducted using IBM SPSS statistics 23.  
17  
18  
19

### 20 380 **Program Feasibility and Analysis**

21  
22  
23 381 At 12-weeks (post intervention), all participants will complete a program  
24  
25  
26 382 satisfaction/acceptability questionnaire. Participants will be asked several Likert scale questions  
27  
28 383 as well as open-ended response questions relating to their experience and satisfaction with the  
29  
30 384 program design, content, resources, and logistics concerning program implementation (i.e., day  
31  
32 385 and time of sessions, structure of sessions, facility where program was delivered). To inform  
33  
34 386 future requirement strategies, data will also be collected from website usage patterns (Google  
35  
36 387 Analytics-frequencies, means, etc.) as they relate to key time points during the program (e.g.,  
37  
38 388 media releases) as well as using paper-based questions regarding how/where participants  
39  
40 389 heard about the program. Program-related statistics, including participant attendance, number  
41  
42 390 of guest presenters and metrics concerning program inquiries, participant communications and  
43  
44 391 follow-ups, will also be collected.  
45  
46  
47  
48  
49

50  
51 392 Semi-structured telephone interviews will be undertaken with a subsample of  
52  
53 393 participants (n=30) to gain further insight concerning satisfaction and acceptability of HAT  
54  
55 394 TRICK, and to understand the challenges/enablers associated with design and implementation  
56  
57  
58  
59  
60

1  
2  
3 395 of the program, including feasibility parameters such as recruitment, attendance, adherence  
4  
5  
6 396 and acceptability of the program and content. Participants will be purposefully selected from  
7  
8  
9 397 each of the three HAT TRICK groups to include men reporting a range of feasibility and program  
10  
11 398 outcomes. These individuals will include those who have completed the program (i.e.,  
12  
13 399 completed baseline and 12-week follow-up assessment periods) and have attended at least  
14  
15  
16 400 50% of the sessions (i.e., 6 of 12 weekly 90 minute sessions). Data collection and analysis will  
17  
18 401 occur simultaneously in three phases as the HAT TRICK program is implemented. Interview  
19  
20  
21 402 questions will be refined as data collection progresses to address gaps identified in the analysis  
22  
23 403 as well as expand on and verify emerging themes. Data from the interviews will be audio  
24  
25  
26 404 recorded (with participants' permission) and transcribed verbatim with all identifiable  
27  
28 405 information removed. Data will be analyzed using thematic content analysis [85] to explore  
29  
30  
31 406 participant satisfaction and enjoyment and to identify challenges experienced during program  
32  
33 407 implementation as well as factors that may have facilitated implementation. To enhance rigor,  
34  
35  
36 408 at least two members of the research team will independently code participant responses into  
37  
38 409 relevant subthemes. Once all coding has been completed, subthemes will be discussed among  
39  
40  
41 410 the two research team members to ensure bias is minimized. Any disagreements or concerns  
42  
43 411 that may arise during the analysis will be presented at this time and further discussion will be  
44  
45  
46 412 carried out with the research team until consensus is reached.

#### 47 48 **Ethics and Dissemination:**

49  
50  
51 414 Ethical approval for this trial was obtained from the University of British Columbia  
52  
53 415 Okanagan Behavioural Research Ethics Board (#H1600736). Participants provided informed  
54  
55  
56 416 consent (Please see Supplementary File 2) and medical clearance prior to all baseline  
57  
58  
59  
60



1  
2  
3 417 assessments. Participants were also informed that they may withdraw from the study at any  
4  
5  
6 418 time, for any reason, without consequence. All personal data will be coded and handled with  
7  
8 419 confidentiality.  
9

10 420 Study findings will be disseminated widely through national and international academic  
11  
12 421 meetings, peer reviewed publication and by web-based activities (e.g., podcasts, research  
13  
14 422 webinars). In addition, these findings will also be disseminated through social media (e.g.,  
15  
16 423 facebook, twitter), plain language summaries to participants, summary briefings to local  
17  
18 424 stakeholders and government agencies, and co-delivered (i.e., researcher-participants)  
19  
20 425 community presentations.  
21  
22 426  
23  
24  
25  
26  
27

## 28 427 **DISCUSSION**

29  
30 428 Engaging men in health promoting behaviors, such as PA and healthy eating can be  
31  
32 429 challenging. Men have often been regarded as 'hard to reach' in terms of health promotion  
33  
34 430 programs with linkages being made to some masculine ideals as contributing to men's  
35  
36 431 estrangement from their health. This is further supported by the research which has suggested  
37  
38 432 that many men are reticent to attend health promotion education sessions, disinterested in  
39  
40 433 information concerning disease prevention and estranged from professional health care  
41  
42 434 services [86,87] although more recent research is beginning to challenge such stereotypes.  
43  
44 435 Some researchers suggest these 'traditional' patterns are implicated in Western men's shorter  
45  
46 436 life expectancy compared to women and high morbidity rates associated with chronic disease  
47  
48 437 [88,89]. Thus, men are a population that would benefit from effective targeted programs to  
49  
50 438 engage them in healthy lifestyle behaviors, including PA and healthy eating. To reach and  
51  
52  
53  
54  
55  
56  
57  
58  
59  
60

1  
2  
3 439 engage men, innovative approaches that are aligned with a range of masculinities (e.g.,  
4  
5  
6 440 strength, toughness, risk-taking and skill in PA) as well as provide safe male spaces to promote  
7  
8  
9 441 trust and normalize men's efforts to change their health behaviours show promise in garnering  
10  
11 442 significant success in advancing the health of men and their families [12,13,19,26,30].

12  
13 443 HAT TRICK was designed to address these specific elements by creating an evidence  
14  
15  
16 444 based program that employed men-friendly strategies to fully engage men's participation,  
17  
18 445 including; aligning with an elite male sports team (i.e., Kelowna Rockets), promoting friendly  
19  
20  
21 446 competition, and delivering the program in a familiar "place" (i.e., hockey arena and  
22  
23 447 surrounding male-friendly community venues) where men ordinarily gather and connect with  
24  
25  
26 448 others (i.e., male facilitators and male only participants) who share similar interests. Appealing  
27  
28 449 to these well-known masculine values and norms including friendly competition, and catering  
29  
30  
31 450 to methods and modes of delivery that recognise gender differences have been successful  
32  
33 451 approaches to men-centered PA and healthy eating programs [12,26,27,47].

34  
35  
36 452 Another promising aspect of HAT TRICK is its potential to be transferred across a  
37  
38 453 number of male populations and settings, thus further increasing its reach to a large proportion  
39  
40  
41 454 of men. In part, HAT TRICK is based on the successful Football Fans In Training (FFIT)  
42  
43 455 intervention [27,30], which was designed to engage overweight Scottish men in weight  
44  
45  
46 456 management and healthy living program by capitalizing on men's team loyalty and love of the  
47  
48 457 game of soccer . FFIT was specifically developed within a context that supports masculine  
49  
50  
51 458 ideals, encompassing a look and feel that appeals to many men [22,32]. HAT TRICK utilised  
52  
53 459 these same principles, but altered the context of delivery by developing the program to fit with  
54  
55  
56 460 the national sports obsession of Canadian men, ice hockey. Specifically, the program's name  
57  
58  
59  
60

1  
2  
3 461 (HAT TRICK), logo design, resources and content are all influenced by the sport of ice hockey.  
4  
5  
6 462 Although this particular program was designed to appeal to male Canadian ice hockey fans, the  
7  
8 463 unique aspect of this model is that it can be easily modified to appeal to male fans of other  
9  
10  
11 464 sports or activities. For instance, the same model has been recreated to appeal to Rugby fans in  
12  
13 465 the UK. The Rugby Fans in Training (RuFIT) [35] study (and subsequently Premiership Rugby's  
14  
15 466 Move Like a Pro program) aimed to test the FFIT model in the English professional rugby club  
16  
17 467 setting, and to enhance long term weight loss and lifestyle change for men in the UK. In North  
18  
19  
20  
21 468 America, a similar approach could be transferable to other popular sports including gridiron  
22  
23 469 football, basketball and baseball, all of which exist within professional leagues that have a  
24  
25  
26 470 strong male fan base.

27  
28 471 Although HAT TRICK can be recreated and transferred to suit fans of a variety of sports,  
29  
30  
31 472 we do acknowledge that there is a great diversity of men within Canada (e.g., new immigrant  
32  
33 473 men, older age men, gay men, men from remote areas) who may have other interests beyond  
34  
35  
36 474 sport. Thus, prior to undertaking refinements and restructuring the program, formative  
37  
38 475 evaluations should be undertaken with these specific male groups in order to gain further  
39  
40  
41 476 knowledge concerning local, regional and global masculine values and norms [24].  
42

43  
44 477 In conclusion, given the limited published research for effective and feasible approaches  
45  
46 478 to men's health promotion, but the promise shown by programs such as FFIT, the results of this  
47  
48 479 feasibility study will serve as a valuable platform to guide future work. There also seems to be  
49  
50  
51 480 great opportunity for sustainability and scalability of the HAT TRICK program based on its  
52  
53 481 transferability and the thoughtful deliberate formal evaluation of this intervention.  
54

55  
56 482  
57  
58  
59  
60

1  
2  
3 483 **TRIAL STATUS**  
4

5  
6 484 The trial was registered on August 3, 2016. Recruitment for this study began in December 2016  
7  
8 485 and is ongoing until September 2017.  
9

10 486

11  
12  
13 487 **AUTHOR CONTRIBUTIONS**  
14

15  
16 488 CMC, JLB, JLO, STJ, KH conceived the project and procured the project funding. CMC is leading  
17  
18 489 the coordination of the trial. CMC, JLB, JLO, STJ, KH, contributed to the study design. PS is  
19  
20 490 managing the trial, including data collection, with assistance from KMF and RP. CMC, PS, KMF  
21  
22 491 and RP drafted the manuscript and all authors read, edited and approved the final manuscript.  
23  
24  
25

26 492

27  
28 493 **FUNDING**  
29

30  
31 494 This research is being funded by the Canadian Cancer Society (grant #704230). Kate Hunt is  
32  
33 495 supported by the UK Medical Research Council (MC\_UU12017/12) and the Chief Scientist Office  
34  
35 496 (SPHSU12).  
36  
37

38 497

39  
40  
41 498 **COMPETING INTERESTS**  
42

43 499 All authors state that they have no competing interests to declare.  
44  
45

46 500

47  
48 501 **DATA SHARING**  
49

50  
51 502 The datasets analyzed during the current trial will be available from the corresponding author  
52  
53 503 on reasonable request.  
54  
55

56 504  
57  
58  
59  
60

1  
2  
3 505 **PROVENCE AND PEER REVIEW**  
4

5  
6 506 Not commissioned; externally peer reviewed.  
7

8 507  
9

10  
11 508 **FIGURES**  
12

13 509 Figure 1. Flow diagram of HAT TRICK protocol  
14

15  
16 510 Figure 2. Standard Protocol Items: Recommendations for Interventional Trials (SPIRIT) figure  
17

18 511  
19

20  
21 512 **SUPPLEMENTRAY FILES**  
22

23 513 Supplementary File 1. SPIRIT Checklist  
24

25  
26 514 Supplementary File 2. Informed consent form  
27  
28  
29  
30  
31  
32  
33  
34  
35  
36  
37  
38  
39  
40  
41  
42  
43  
44  
45  
46  
47  
48  
49  
50  
51  
52  
53  
54  
55  
56  
57  
58  
59  
60

1  
2  
3 515 REFERENCES  
4

- 5  
6 516 1. Lee CD, Sui X, Hooker SP, Hebert JR, Blair SN. Combined impact of lifestyle factors on  
7  
8 517 cancer mortality in men. *Ann Epidemiol*. Oct 2011;21(10):749-754.  
9  
10 518 2. Shiroma EJ, Sesso HD, Lee IM. Physical activity and weight gain prevention in older men.  
11  
12 519 *Int J Obes (Lond)*. Sep 2012;36(9):1165-1169.  
13  
14 520 3. Kohl HW, 3rd, Craig CL, Lambert EV, et al. The pandemic of physical inactivity: global  
15  
16 521 action for public health. *Lancet*. Jul 21 2012;380(9838):294-305.  
17  
18 522 4. Nunan D, Mahtani KR, Roberts N, Heneghan C. Physical activity for the prevention and  
19  
20 523 treatment of major chronic disease: an overview of systematic reviews. *Syst Rev*. Jul 10  
21  
22 524 2013;2:56.  
23  
24 525 5. WHO. *Global Recommendations on Physical Activity and Health*. Geneva: World Health  
25  
26 526 Organization;2010.  
27  
28 527 6. Colley RC, Garriguet D, Janssen I, Craig CL, Clarke J, Tremblay MS. Physical activity of  
29  
30 528 Canadian children and youth: accelerometer results from the 2007 to 2009 Canadian  
31  
32 529 Health Measures Survey. *Health Rep*. Mar 2011;22(1):15-23.  
33  
34 530 7. Wardle J, Haase AM, Steptoe A, Nillapun M, Jonwutiwes K, Bellisle F. Gender differences  
35  
36 531 in food choice: the contribution of health beliefs and dieting. *Ann Behav Med*. Apr  
37  
38 532 2004;27(2):107-116.  
39  
40 533 8. Baker AH, Wardle J. Sex differences in fruit and vegetable intake in older adults.  
41  
42 534 *Appetite*. Jun 2003;40(3):269-275.  
43  
44 535 9. Belanger-Ducharme F, Tremblay A. Prevalence of obesity in Canada. *Obes Rev*. Aug  
45  
46 536 2005;6(3):183-186.  
47  
48  
49  
50  
51  
52  
53  
54  
55  
56  
57  
58  
59  
60

- 1  
2  
3 537 **10.** Baker P. Current issues in men's health. *Trends Urol Men's Health*. 2012;3:19-21.  
4  
5  
6 538 **11.** Sinclair A, Alexander HA. Using outreach to involve the hard-to-reach in a health check:  
7  
8 539 what difference does it make? *BMC Public Health*. Feb 2012;126(2):87-95.  
9  
10 540 **12.** Young MD, Morgan PJ, Plotnikoff RC, Callister R, Collins CE. Effectiveness of male-only  
11  
12 541 weight loss and weight loss maintenance interventions: a systematic review with meta-  
13  
14 542 analysis. *Obes Rev*. May 2012;13(5):393-408.  
15  
16 543 **13.** Pagoto SL, Schneider KL, Oleski JL, Luciani JM, Bodenlos JS, Whited MC. Male inclusion in  
17  
18 544 randomized controlled trials of lifestyle weight loss interventions. *Obesity (Silver Spring)*.  
19  
20 545 Jun 2012;20(6):1234-1239.  
21  
22 546 **14.** Courtenay WH. Constructions of masculinity and their influence on men's well-being: a  
23  
24 547 theory of gender and health. *Soc Sci Med*. May 2000;50(10):1385-1401.  
25  
26 548 **15.** Courtenay WE. Making health manly: Norms, peers, and men's health. In: Cohen L,  
27  
28 549 Chavez V, Chehimi S, eds. *Prevention is primary; Strategies for community wellbeing*. San  
29  
30 550 Francisco, CA: Jossey-Bass; 2007.  
31  
32 551 **16.** Gough B. Try to be healthy, but don't forgot your masculinity: deconstructing men's  
33  
34 552 health discourse in the media. *Soc Sci Med*. Nov 2006;63(9):2476-2488.  
35  
36 553 **17.** Robertson S. *Understanding men and health: Masculinities, identities and well-being*.  
37  
38 554 Buckingham, UK: Open University Press; 2007.  
39  
40 555 **18.** Sloan C, Gough B, Conner M. Healthy masculinities? How ostensibly healthy men talk  
41  
42 556 about lifestyle, health and gender. *Psychol Health*. Sep 2010;25(7):783-803.  
43  
44  
45  
46  
47  
48  
49  
50  
51  
52  
53  
54  
55  
56  
57  
58  
59  
60

- 1  
2  
3 557 **19.** Cormie P, Oliffe JL, Wootten AC, Galvao DA, Newton RU, Chambers SK. Improving  
4  
5  
6 558 psychosocial health in men with prostate cancer through an intervention that reinforces  
7  
8 559 masculine values - exercise. *Psychooncology*. Jun 18 2015.
- 9  
10 560 **20.** Gough B. 'Real men don't diet': an analysis of contemporary newspaper representations  
11  
12 561 of men, food and health. *Soc Sci Med*. Jan 2007;64(2):326-337.
- 13  
14 562 **21.** Pringle A, Zwolinsky S, McKenna J, Robertson S, Daly-Smith A, White A. Health  
15  
16 563 improvement for men and hard-to-engage-men delivered in English Premier League  
17  
18 564 football clubs. *Health Educ Res*. Jun 2014;29(3):503-520.
- 19  
20 565 **22.** Gray CM, Hunt K, Mutrie N, et al. Football Fans in Training: the development and  
21  
22 566 optimization of an intervention delivered through professional sports clubs to help men  
23  
24 567 lose weight, become more active and adopt healthier eating habits. *BMC Public Health*.  
25  
26 568 2013;13:232.
- 27  
28 569 **23.** Oliffe JL, Bottorff JL, Sharp P, et al. Healthy Eating and Active Living: Rural Based  
29  
30 570 Working Men's Perspectives. *Am J Mens Health*. 2015.
- 31  
32 571 **24.** Caperchione CM, Sharp P, Bottorff JL, et al. The POWERPLAY workplace physical activity  
33  
34 572 and nutrition intervention for men: Study protocol and baseline characteristics.  
35  
36 573 *Contemp Clin Trials*. Jul 14 2015;44:42-47.
- 37  
38 574 **25.** Johnson ST, Stolp S, Seaton C, et al. A Men's Workplace Health Intervention: Results of  
39  
40 575 the POWERPLAY Program Pilot Study. *J Occup Environ Med*. Aug 2016;58(8):765-769.
- 41  
42 576 **26.** Caperchione CM, Stolp S, Bottorff JL, et al. Changes in Men's Physical Activity and  
43  
44 577 Healthy Eating Knowledge and Behavior as a Result of Program Exposure: Findings From  
45  
46 578 the Workplace POWERPLAY Program. *J Phys Act Health*. Dec 2016;13(12):1364-1371.
- 47  
48  
49  
50  
51  
52  
53  
54  
55  
56  
57  
58  
59  
60



- 1  
2  
3 579 **27.** Wyke S, Hunt K, Gray CM, et al. Football Fans in Training (FFIT): a randomised controlled  
4  
5  
6 580 trial of a gender-sensitised weight loss and healthy living programme for men-end of  
7  
8 581 study report. *Public Health Res.* 2015;3(2):1-129.  
9  
10  
11 582 **28.** Mason OJ, Holt R. Mental health and physical activity interventions: a review of the  
12  
13 583 qualitative literature. *J Mental Health.* Jun 2012;21(3):274-284.  
14  
15  
16 584 **29.** Brady AJ, Perry C, Murdoch DL, McKay G. Sustained benefits of a health project for  
17  
18 585 middle-aged football supporters, at Glasgow Celtic and Glasgow Rangers Football Clubs.  
19  
20  
21 586 *Eur Heart J.* Dec 2010;31(24):2696-2698.  
22  
23  
24 587 **30.** Hunt K, Wyke S, Gray CM, et al. A gender-sensitised weight loss and healthy living  
25  
26 588 programme for overweight and obese men delivered by Scottish Premier League  
27  
28 589 football clubs (FFIT): a pragmatic randomised controlled trial. *Lancet.* Apr 5  
29  
30  
31 590 2014;383(9924):1211-1221.  
32  
33  
34 591 **31.** Gill DP, Blunt W, De Cruz A, et al. Hockey Fans in Training (Hockey FIT) pilot study  
35  
36 592 protocol: a gender-sensitized weight loss and healthy lifestyle program for overweight  
37  
38 593 and obese male hockey fans. *BMC Public Health.* Oct 19 2016;16(1):1096.  
39  
40  
41 594 **32.** Hunt K, McCann C, Gray CM, Mutrie N, Wyke S. "You've got to walk before you run":  
42  
43 595 positive evaluations of a walking program as part of a gender-sensitized, weight-  
44  
45 596 management program delivered to men through professional football clubs. *Health*  
46  
47  
48 597 *Psychol.* Jan 2013;32(1):57-65.  
49  
50  
51 598 **33.** Bunn C, Wyke S, Gray CM, Maclean A, Hunt K. 'Coz football is what we all have':  
52  
53 599 masculinities, practice, performance and effervescence in a gender-sensitised weight-  
54  
55 600 loss and healthy living programme for men. *Sociol Health Illn.* Jun 2016;38(5):812-828.  
56  
57  
58  
59  
60

- 1  
2  
3 601 **34.** van Nassau F, van der Ploeg HP, Abrahamsen F, et al. Study protocol of European Fans in  
4  
5  
6 602 Training (EuroFIT): a four-country randomised controlled trial of a lifestyle program for  
7  
8 603 men delivered in elite football clubs. *BMC Public Health*. Jul 19 2016;16:598.  
9  
10  
11 604 **35.** Gray CM, Brennan G, Maclean A, Mutrie N, Hunt K, Wyke S. Can professional rugby clubs  
12  
13 605 attract English male rugby supporters to a healthy lifestyle programme: the Rugby Fans  
14  
15 606 in Training (RuFIT). *Eur J Public Health*. 2014;24(suppl 2):166.  
16  
17  
18 607 **36.** Canadian Hockey League. Canadian Hockey League. 2017; <http://chl.ca/>. Accessed 25  
19  
20 608 Feb, 2017.  
21  
22  
23 609 **37.** Chan AW, Tetzlaff JM, Gotzsche PC, et al. SPIRIT 2013 explanation and elaboration:  
24  
25 610 guidance for protocols of clinical trials. *BMJ*. Jan 08 2013;346:e7586.  
26  
27  
28 611 **38.** Arain M, Campbell MJ, Cooper CL, Lancaster GA. What is a pilot or feasibility study? A  
29  
30 612 review of current practice and editorial policy. *BMC Med Res Methodol*. 2010;10:67.  
31  
32  
33 613 **39.** McLeroy KR, Bibeau D, Steckler A, Glanz K. An ecological perspective on health  
34  
35 614 promotion programs. *Health Educ Q*. Winter 1988;15(4):351-377.  
36  
37  
38 615 **40.** Canadian Society for Exercise Physiology. Physical Activity and Readiness Questionnaire  
39  
40 616 for everyone: PAR-Q+. 2012;  
41  
42 617 [http://www.csep.ca/cmfiles/publications/parq/parqplusept2011version\\_all.pdf](http://www.csep.ca/cmfiles/publications/parq/parqplusept2011version_all.pdf).  
43  
44 618 Accessed 21, Feb 2017.  
45  
46  
47 619 **41.** Duncan MJ, Rosenkranz RR, Vandelanotte C, et al. What is the impact of obtaining  
48  
49 620 medical clearance to participate in a randomised controlled trial examining a physical  
50  
51 621 activity intervention on the socio-demographic and risk factor profiles of included  
52  
53 622 participants? *Trials*. Dec 07 2016;17(1):580.  
54  
55  
56  
57  
58  
59  
60

- 1  
2  
3 623 **42.** Canadian Society for Exercise Physiology. Canadian Society for Exercise Physiology  
4  
5  
6 624 (CSEP). 1967; 9  
10  
11 626 **43.** Botorff JL, Seaton CL, Johnson ST, et al. An Updated Review of Interventions that  
12  
13 627 Include Promotion of Physical Activity for Adult Men. *Sports Med.* Jun 2015;45(6):775-  
14  
15 628 800.  
16  
17  
18 629 **44.** Bandura A. *Social foundation of thought and action: A social cognitive theory.*  
19  
20  
21 630 Englewood Cliffs, NJ: Prentice-Hall; 1986.  
22  
23 631 **45.** Bandura A. Social Cognitive theory of self-regulation. *Organ Behav Hum Decis Process.*  
24  
25 632 1991;50(2):248-287.  
26  
27  
28 633 **46.** Deci EL, Ryan RM. *Intrinsic motivation and self-determination in human behavior.* New  
29  
30 634 York, NY: Plenum; 1985.  
31  
32  
33 635 **47.** Caperchione CM, Vandelanotte C, Kolt GS, et al. What a man wants: understanding the  
34  
35 636 challenges and motivations to physical activity participation and healthy eating in  
36  
37 637 middle-aged Australian men. *Am J Mens Health.* Nov 2012;6(6):453-461.  
38  
39  
40 638 **48.** Taylor PJ, Kolt GS, Vandelanotte C, et al. A review of the nature and effectiveness of  
41  
42 639 nutrition interventions in adult males--a guide for intervention strategies. *Int J Behav*  
43  
44 640 *Nutr Phys Act.* Jan 29 2013;10:13.  
45  
46  
47  
48 641 **49.** Verdonk P, Seesing H, de Rijk A. Doing masculinity, not doing health? A qualitative study  
49  
50 642 among Dutch male employees about health beliefs and workplace physical activity. *BMC*  
51  
52 643 *Public Health.* Nov 19 2010;10:712.  
53  
54  
55  
56  
57  
58  
59  
60

- 1  
2  
3 644 **50.** George ES, Kolt GS, Duncan MJ, et al. A review of the effectiveness of physical activity  
4  
5  
6 645 interventions for adult males. *Sports Med.* Apr 01 2012;42(4):281-300.  
7  
8 646 **51.** Morgan PJ, Collins CE, Plotnikoff RC, et al. Efficacy of a workplace-based weight loss  
9  
10 647 program for overweight male shift workers: the Workplace POWER (Preventing Obesity  
11  
12 648 Without Eating like a Rabbit) randomized controlled trial. *Prev Med.* May  
13  
14 649 2011;52(5):317-325.  
15  
16 650 **52.** National Institute of Health. Clinical guidelines on the identification, evaluation, and  
17  
18 651 treatment of overweight and obesity in adults-the evidence report. Washington,  
19  
20 652 DC1998:56-94.  
21  
22 653 **53.** Freedson PS, Melanson E, Sirard J. Calibration of the Computer Science and Applications,  
23  
24 654 Inc. accelerometer. *Med Sci Sports Exerc.* May 1998;30(5):777-781.  
25  
26 655 **54.** Troiano RP, Berrigan D, Dodd KW, Masse LC, Tilert T, McDowell M. Physical activity in  
27  
28 656 the United States measured by accelerometer. *Med Sci Sports Exerc.* Jan  
29  
30 657 2008;40(1):181-188.  
31  
32 658 **55.** Kelly LA, McMillan DG, Anderson A, Fippinger M, Fillerup G, Rider J. Validity of  
33  
34 659 actigraphs uniaxial and triaxial accelerometers for assessment of physical activity in  
35  
36 660 adults in laboratory conditions. *BMC Med Phys.* 2013;13(1):5.  
37  
38 661 **56.** Sasaki JE, John D, Freedson PS. Validation and comparison of ActiGraph activity  
39  
40 662 monitors. *J Sci Med Sport.* Sep 2011;14(5):411-416.  
41  
42 663 **57.** Vanhelst J, Mikulovic J, Bui-Xuan G, et al. Comparison of two ActiGraph accelerometer  
43  
44 664 generations in the assessment of physical activity in free living conditions. *BMC Res*  
45  
46 665 *Notes.* Apr 25 2012;5:187.  
47  
48  
49  
50  
51  
52  
53  
54  
55  
56  
57  
58  
59  
60

- 1  
2  
3 666 58. Godin G, Shephard RJ. A simple method to assess exercise behavior in the community.  
4  
5  
6 667 *Can J Appl Sport Sci.* Sep 1985;10(3):141-146.  
7  
8  
9 668 59. Brown WJ, Bauman AE. Comparison of estimates of population levels of physical activity  
10  
11 669 using two measures. *Aust N Z J Public health.* Oct 2000;24(5):520-525.  
12  
13 670 60. Plotnikoff RC, Johnson ST, Loucaides CA, Bauman AE, Karunamuni ND, Pickering MA.  
14  
15  
16 671 Population-based estimates of physical activity for adults with type 2 diabetes: a  
17  
18 672 cautionary tale of potential confounding by weight status. *J Obes.* 2011;2011.  
19  
20  
21 673 61. Godin G, Jobin J, Bouillon J. Assessment of leisure time exercise behavior by self-report:  
22  
23 674 a concurrent validity study. *Can J Public Health.* Sep-Oct 1986;77(5):359-362.  
24  
25  
26 675 62. Jacobs DR, Jr., Ainsworth BE, Hartman TJ, Leon AS. A simultaneous evaluation of 10  
27  
28 676 commonly used physical activity questionnaires. *Med Sci Sports Exerc.* Jan  
29  
30  
31 677 1993;25(1):81-91.  
32  
33 678 63. Hyde AL, Elavsky S, Doerksen SE, Conroy DE. The stability of automatic evaluations of  
34  
35  
36 679 physical activity and their relations with physical activity. *J Sport Exerc Psychol.* Dec  
37  
38 680 2012;34(6):715-736.  
39  
40  
41 681 64. Marshall AL, Miller YD, Burton NW, Brown WJ. Measuring total and domain-specific  
42  
43 682 sitting: a study of reliability and validity. *Med Sci Sports Exerc.* Jun 2010;42(6):1094-  
44  
45 683 1102.  
46  
47  
48 684 65. Roe L, Strong C, Whiteside C, Neil A, Mant D. Dietary intervention in primary care:  
49  
50  
51 685 validity of the DINE method for diet assessment. *Fam Pract.* Dec 1994;11(4):375-381.  
52  
53 686 66. Cole JA, Gillespie P, Smith SM, Byrne M, Murphy AW, Cupples ME. Using postal  
54  
55  
56 687 questionnaires to evaluate physical activity and diet behaviour change: case study  
57  
58  
59  
60

- 1  
2  
3 688 exploring implications of valid responder characteristics in interpreting intervention  
4  
5  
6 689 outcomes. *BMC Res Notes*. 2014;7:725.  
7  
8 690 **67.** John JH, Ziebland S, Yudkin P, Roe LS, Neil HA. Effects of fruit and vegetable  
9  
10 691 consumption on plasma antioxidant concentrations and blood pressure: a randomised  
11  
12 692 controlled trial. *Lancet*. Jun 08 2002;359(9322):1969-1974.  
13  
14  
15 693 **68.** Diemert L, Kueller-Olaman R, Schwartz R, O'Conner S, Babayan A. Data Standards for  
16  
17 694 Smoke-free Ontario Smoking Cessation Service Providers: Core Indicators and Questions  
18  
19 695 for Intake and Follow-up of Adult Respondents. Toronto, ON: Ontario Tobacco Research  
20  
21 696 Unit; 2013.  
22  
23  
24 697 **69.** Emslie C, Lewars H, Batty GD, Hunt K. Are there gender differences in levels of heavy,  
25  
26 698 binge and problem drinking? Evidence from three generations in the west of Scotland.  
27  
28 699 *BMC Public Health*. Jan 2009;123(1):12-14.  
29  
30  
31 700 **70.** Centres for Disease Control and Prevention. Sleep Disorders: National Health and  
32  
33 701 Nutrition Examination Survey 2013: Centres for Disease Control and Prevention,; 2013.  
34  
35  
36 702 **71.** Rice SM, Fallon BJ, Aucote HM, Moller-Leimkuhler AM. Development and preliminary  
37  
38 703 validation of the male depression risk scale: furthering the assessment of depression in  
39  
40 704 men. *J Affect Disord*. Dec 2013;151(3):950-958.  
41  
42  
43 705 **72.** Rice SM, Fallon BJ, Aucote HM, Moller-Leimkuhler A, Treeby MS, Amminger GP.  
44  
45 706 Longitudinal sex differences of externalising and internalising depression symptom  
46  
47 707 trajectories: Implications for assessment of depression in men from an online study. *Int J*  
48  
49 708 *Soc Psychiatry*. May 2015;61(3):236-240.  
50  
51  
52  
53  
54  
55  
56  
57  
58  
59  
60

- 1  
2  
3 709 **73.** Ware J, Jr., Kosinski M, Keller SD. A 12-Item Short-Form Health Survey: construction of  
4  
5  
6 710 scales and preliminary tests of reliability and validity. *Med Care*. Mar 1996;34(3):220-  
7  
8 711 233.
- 9  
10  
11 712 **74.** Ware JE, Kosinski M, Keller SD. *SF-36 Physical and Mental Health Summary Scales: A*  
12  
13 713 *User's Manual*. Boston, MA: The Health Institute, New England Medical Center;1994.
- 14  
15  
16 714 **75.** Ware JE, Kosinski M, Keller SD. *SF-12: How to score the SF-12 Physical and Mental Health*  
17  
18 715 *Summary Scales*. Lincoln, RI: Quality Metric Incorporated; 1998.
- 19  
20  
21 716 **76.** Jenkinson C, Chandola T, Coulter A, Bruster S. An assessment of the construct validity of  
22  
23 717 the SF-12 summary scores across ethnic groups. *J Public Health Med*. Sep  
24  
25 718 2001;23(3):187-194.
- 26  
27  
28 719 **77.** Burdine JN, Felix MR, Abel AL, Wiltraut CJ, Musselman YJ. The SF-12 as a population  
29  
30  
31 720 health measure: an exploratory examination of potential for application. *Health Serv*  
32  
33 721 *Res*. Oct 2000;35(4):885-904.
- 34  
35  
36 722 **78.** Jakobsson U. Using the 12-item Short Form health survey (SF-12) to measure quality of  
37  
38 723 life among older people. *Aging Clin Exp Res*. Dec 2007;19(6):457-464.
- 39  
40  
41 724 **79.** Wee CC, Davis RB, Hamel MB. Comparing the SF-12 and SF-36 health status  
42  
43 725 questionnaires in patients with and without obesity. *Health Qual Life Outcomes*. Jan 30  
44  
45 726 2008;6:11.
- 46  
47  
48 727 **80.** Koenig HG, Westlund RE, George LK, Hughes DC, Blazer DG, Hybels C. Abbreviating the  
49  
50  
51 728 Duke Social Support Index for use in chronically ill elderly individuals. *Psychosomatics*.  
52  
53 729 Jan-Feb 1993;34(1):61-69.
- 54  
55  
56  
57  
58  
59  
60

- 1  
2  
3 730 **81.** Goodger B, Byles J, Higginbotham N, Mishra G. Assessment of a short scale to measure  
4  
5  
6 731 social support among older people. *Aust N Z J Public Health*. Jun 1999;23(3):260-265.  
7  
8 732 **82.** Powers JR, Goodger B, Byles JE. Assessment of the abbreviated Duke Social Support  
9  
10 733 Index in a cohort of Australian women. *Austral J Age*. 2004;23(2):71-76.  
11  
12  
13 734 **83.** Ebeling-Witte S, Frank ML, Lester D. Shyness, Internet use, and personality.  
14  
15 735 *Cyberpsychol Behav*. Oct 2007;10(5):713-716.  
16  
17  
18 736 **84.** Pachana NA, Smith N, Watson M, McLaughlin D, Dobson A. Responsiveness of the Duke  
19  
20 737 Social Support sub-scales in older women. *Age Ageing*. Nov 2008;37(6):666-672.  
21  
22  
23 738 **85.** Braun V, Clarke V. Using thematic analysis in psychology. *Qual Res Psychol*.  
24  
25 739 2006;3(2):77-101.  
26  
27  
28 740 **86.** Lee C, Owen GR. *The Psychology of Men's Health*. Philadelphia: Open University Press;  
29  
30 741 2002.  
31  
32  
33 742 **87.** Deeks A, Lombard C, Michelmore J, Teede H. The effects of gender and age on health  
34  
35 743 related behaviors. *BMC Public Health*. Jun 30 2009;9:213.  
36  
37  
38 744 **88.** Pinkhasov RM, Wong J, Kashanian J, et al. Are men shortchanged on health? Perspective  
39  
40 745 on health care utilization and health risk behavior in men and women in the United  
41  
42 746 States. *Int J Clin Pract*. Mar 2010;64(4):475-487.  
43  
44  
45 747 **89.** Salomon JA, Wang H, Freeman MK, et al. Healthy life expectancy for 187 countries,  
46  
47 748 1990-2010: a systematic analysis for the Global Burden Disease Study 2010. *Lancet*. Dec  
48  
49 749 15 2012;380(9859):2144-2162.  
50  
51  
52  
53 750  
54  
55  
56 751  
57  
58  
59  
60



1  
2  
3  
4  
5  
6  
7  
8  
9  
10  
11  
12  
13  
14  
15  
16  
17  
18  
19  
20  
21  
22  
23  
24  
25  
26  
27  
28  
29  
30  
31  
32  
33  
34  
35  
36  
37  
38  
39  
40  
41  
42  
43  
44  
45  
46  
47  
48  
49  
50  
51  
52  
53  
54  
55  
56  
57  
58  
59  
60

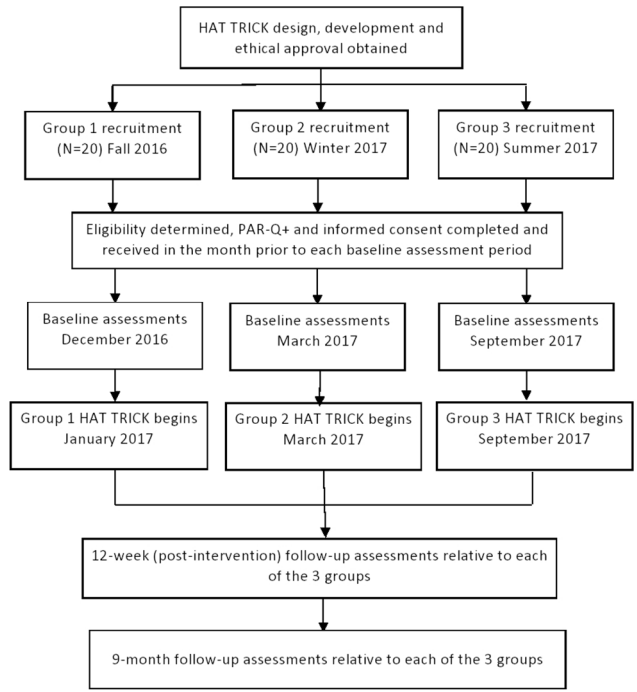

Figure 1. Flow diagram of HAT TRICK protocol

Figure 1. Flow diagram of HAT TRICK protocol

107x139mm (300 x 300 DPI)

1  
2  
3  
4  
5  
6  
7  
8  
9  
10  
11  
12  
13  
14  
15  
16  
17  
18  
19  
20  
21  
22  
23  
24  
25  
26  
27  
28  
29  
30  
31  
32  
33  
34  
35  
36  
37  
38  
39  
40  
41  
42  
43  
44  
45  
46  
47  
48  
49  
50  
51  
52  
53  
54  
55  
56  
57  
58  
59  
60

| TIMEPOINT**                   | STUDY PERIOD               |                      |                                                                                   |                                |
|-------------------------------|----------------------------|----------------------|-----------------------------------------------------------------------------------|--------------------------------|
|                               | Enrolment<br>-8 to 0 weeks | Allocation<br>0 week | 1-12 weeks                                                                        | Close-out<br>9-month follow-up |
| <b>ENROLMENT:</b>             |                            |                      |                                                                                   |                                |
| Eligibility screen            | X                          |                      |                                                                                   |                                |
| Informed consent              | X                          |                      |                                                                                   |                                |
| Medical clearance             | X                          |                      |                                                                                   |                                |
| <b>INTERVENTIONS:</b>         |                            |                      |                                                                                   |                                |
| <i>HAT TRICK Intervention</i> |                            |                      |  |                                |
| <b>ASSESSMENTS:</b>           |                            |                      |                                                                                   |                                |
| Demographics                  |                            | X                    |                                                                                   |                                |
| Anthropometrics               |                            | X                    | X                                                                                 | X                              |
| Physical Activity             |                            | X                    | X                                                                                 | X                              |
| Sedentary behavior            |                            | X                    | X                                                                                 | X                              |
| Dietary behavior              |                            | X                    | X                                                                                 | X                              |
| Smoking                       |                            | X                    | X                                                                                 | X                              |
| Alcohol consumption           |                            | X                    | X                                                                                 | X                              |
| Sleep habits                  |                            | X                    | X                                                                                 | X                              |
| Risk of depression            |                            | X                    | X                                                                                 | X                              |
| HRQoL                         |                            | X                    | X                                                                                 | X                              |
| Social support                |                            | X                    | X                                                                                 | X                              |
| Program Feasibility           |                            |                      | X                                                                                 |                                |

Figure 2. Standard Protocol Items: Recommendations for Interventional Trials (SPIRIT) figure

Figure 2. Standard Protocol Items: Recommendations for Interventional Trials (SPIRIT) figure

107x139mm (300 x 300 DPI)



1  
2  
3  
4  
5  
6  
7  
8  
9  
10  
11  
12  
13  
14  
15  
16  
17  
18  
19  
20  
21  
22  
23  
24  
25  
26  
27  
28  
29  
30  
31  
32  
33  
34  
35  
36  
37  
38  
39  
40  
41  
42  
43  
44  
45  
46  
47  
48  
49

SPIRIT 2013 Checklist: Recommended items to address in a clinical trial protocol and related documents\*

| Section/item                      | Item No | Description                                                                                                                                                                                                                                                                              | Addressed on page number |
|-----------------------------------|---------|------------------------------------------------------------------------------------------------------------------------------------------------------------------------------------------------------------------------------------------------------------------------------------------|--------------------------|
| <b>Administrative information</b> |         |                                                                                                                                                                                                                                                                                          |                          |
| Title                             | 1       | Descriptive title identifying the study design, population, interventions, and, if applicable, trial acronym                                                                                                                                                                             | ___1___                  |
| Trial registration                | 2a      | Trial identifier and registry name. If not yet registered, name of intended registry                                                                                                                                                                                                     | ___4___                  |
|                                   | 2b      | All items from the World Health Organization Trial Registration Data Set                                                                                                                                                                                                                 | ___n/a___                |
| Protocol version                  | 3       | Date and version identifier                                                                                                                                                                                                                                                              | ___7-8___                |
| Funding                           | 4       | Sources and types of financial, material, and other support                                                                                                                                                                                                                              | ___25___                 |
| Roles and responsibilities        | 5a      | Names, affiliations, and roles of protocol contributors                                                                                                                                                                                                                                  | ___1 & 25___             |
|                                   | 5b      | Name and contact information for the trial sponsor                                                                                                                                                                                                                                       | ___1___                  |
|                                   | 5c      | Role of study sponsor and funders, if any, in study design; collection, management, analysis, and interpretation of data; writing of the report; and the decision to submit the report for publication, including whether they will have ultimate authority over any of these activities | ___25___                 |
|                                   | 5d      | Composition, roles, and responsibilities of the coordinating centre, steering committee, endpoint adjudication committee, data management team, and other individuals or groups overseeing the trial, if applicable (see Item 21a for data monitoring committee)                         | ___n/a___                |

1  
2  
3 **Introduction**  
4

|                  |    |                                                                                                                                                                                                           |                 |
|------------------|----|-----------------------------------------------------------------------------------------------------------------------------------------------------------------------------------------------------------|-----------------|
| 5 Background and | 6a | Description of research question and justification for undertaking the trial, including summary of relevant studies (published and unpublished) examining benefits and harms for each intervention        | _____ 5-7 _____ |
| 6 rationale      |    |                                                                                                                                                                                                           |                 |
| 7                |    |                                                                                                                                                                                                           |                 |
| 8                | 6b | Explanation for choice of comparators                                                                                                                                                                     | _____ 5-7 _____ |
| 9                |    |                                                                                                                                                                                                           |                 |
| 10 Objectives    | 7  | Specific objectives or hypotheses                                                                                                                                                                         | _____ 7 _____   |
| 11               |    |                                                                                                                                                                                                           |                 |
| 12 Trial design  | 8  | Description of trial design including type of trial (eg, parallel group, crossover, factorial, single group), allocation ratio, and framework (eg, superiority, equivalence, noninferiority, exploratory) | _____ 7-8 _____ |
| 13               |    |                                                                                                                                                                                                           |                 |
| 14               |    |                                                                                                                                                                                                           |                 |

15  
16 **Methods: Participants, interventions, and outcomes**  
17

|                         |     |                                                                                                                                                                                                                                                                                                                                                                                |                          |
|-------------------------|-----|--------------------------------------------------------------------------------------------------------------------------------------------------------------------------------------------------------------------------------------------------------------------------------------------------------------------------------------------------------------------------------|--------------------------|
| 18 Study setting        | 9   | Description of study settings (eg, community clinic, academic hospital) and list of countries where data will be collected. Reference to where list of study sites can be obtained                                                                                                                                                                                             | _____ 7, Fig 1&2 _____   |
| 19                      |     |                                                                                                                                                                                                                                                                                                                                                                                |                          |
| 20                      |     |                                                                                                                                                                                                                                                                                                                                                                                |                          |
| 21 Eligibility criteria | 10  | Inclusion and exclusion criteria for participants. If applicable, eligibility criteria for study centres and individuals who will perform the interventions (eg, surgeons, psychotherapists)                                                                                                                                                                                   | _____ 8-9 _____          |
| 22                      |     |                                                                                                                                                                                                                                                                                                                                                                                |                          |
| 23                      |     |                                                                                                                                                                                                                                                                                                                                                                                |                          |
| 24 Interventions        | 11a | Interventions for each group with sufficient detail to allow replication, including how and when they will be administered                                                                                                                                                                                                                                                     | ___ 9-13, Table 1 _____  |
| 25                      |     |                                                                                                                                                                                                                                                                                                                                                                                |                          |
| 26                      |     |                                                                                                                                                                                                                                                                                                                                                                                |                          |
| 27                      | 11b | Criteria for discontinuing or modifying allocated interventions for a given trial participant (eg, drug dose change in response to harms, participant request, or improving/worsening disease)                                                                                                                                                                                 | _____ 22 _____           |
| 28                      |     |                                                                                                                                                                                                                                                                                                                                                                                |                          |
| 29                      |     |                                                                                                                                                                                                                                                                                                                                                                                |                          |
| 30                      | 11c | Strategies to improve adherence to intervention protocols, and any procedures for monitoring adherence (eg, drug tablet return, laboratory tests)                                                                                                                                                                                                                              | _____ 9-11 _____         |
| 31                      |     |                                                                                                                                                                                                                                                                                                                                                                                |                          |
| 32                      |     |                                                                                                                                                                                                                                                                                                                                                                                |                          |
| 33                      | 11d | Relevant concomitant care and interventions that are permitted or prohibited during the trial                                                                                                                                                                                                                                                                                  | _____ n/a _____          |
| 34                      |     |                                                                                                                                                                                                                                                                                                                                                                                |                          |
| 35 Outcomes             | 12  | Primary, secondary, and other outcomes, including the specific measurement variable (eg, systolic blood pressure), analysis metric (eg, change from baseline, final value, time to event), method of aggregation (eg, median, proportion), and time point for each outcome. Explanation of the clinical relevance of chosen efficacy and harm outcomes is strongly recommended | ___ 13-19, Table 2 _____ |
| 36                      |     |                                                                                                                                                                                                                                                                                                                                                                                |                          |
| 37                      |     |                                                                                                                                                                                                                                                                                                                                                                                |                          |
| 38                      |     |                                                                                                                                                                                                                                                                                                                                                                                |                          |
| 39                      |     |                                                                                                                                                                                                                                                                                                                                                                                |                          |
| 40                      |     |                                                                                                                                                                                                                                                                                                                                                                                |                          |
| 41 Participant timeline | 13  | Time schedule of enrolment, interventions (including any run-ins and washouts), assessments, and visits for participants. A schematic diagram is highly recommended (see Figure)                                                                                                                                                                                               | ___ Fig 2, Table 2 _____ |
| 42                      |     |                                                                                                                                                                                                                                                                                                                                                                                |                          |
| 43                      |     |                                                                                                                                                                                                                                                                                                                                                                                |                          |
| 44                      |     |                                                                                                                                                                                                                                                                                                                                                                                |                          |
| 45                      |     |                                                                                                                                                                                                                                                                                                                                                                                |                          |

1  
2  
3  
4  
5  
6  
7  
8  
9  
10  
11  
12  
13  
14  
15  
16  
17  
18  
19  
20  
21  
22  
23  
24  
25  
26  
27  
28  
29  
30  
31  
32  
33  
34  
35  
36  
37  
38  
39  
40  
41  
42  
43  
44  
45  
46  
47  
48  
49

Sample size 14 Estimated number of participants needed to achieve study objectives and how it was determined, including clinical and statistical assumptions supporting any sample size calculations \_\_ 8, 20\_\_

Recruitment 15 Strategies for achieving adequate participant enrolment to reach target sample size \_\_ 8-9\_\_

**Methods: Assignment of interventions (for controlled trials)**

Allocation:

Sequence generation 16a Method of generating the allocation sequence (eg, computer-generated random numbers), and list of any factors for stratification. To reduce predictability of a random sequence, details of any planned restriction (eg, blocking) should be provided in a separate document that is unavailable to those who enrol participants or assign interventions \_\_ n/a\_\_

Allocation concealment mechanism 16b Mechanism of implementing the allocation sequence (eg, central telephone; sequentially numbered, opaque, sealed envelopes), describing any steps to conceal the sequence until interventions are assigned \_\_ n/a\_\_

Implementation 16c Who will generate the allocation sequence, who will enrol participants, and who will assign participants to interventions \_\_ n/a\_\_

Blinding (masking) 17a Who will be blinded after assignment to interventions (eg, trial participants, care providers, outcome assessors, data analysts), and how \_\_ n/a\_\_

17b If blinded, circumstances under which unblinding is permissible, and procedure for revealing a participant's allocated intervention during the trial \_\_ n/a\_\_

**Methods: Data collection, management, and analysis**

Data collection methods 18a Plans for assessment and collection of outcome, baseline, and other trial data, including any related processes to promote data quality (eg, duplicate measurements, training of assessors) and a description of study instruments (eg, questionnaires, laboratory tests) along with their reliability and validity, if known. Reference to where data collection forms can be found, if not in the protocol \_\_ 13-19, Table 2\_\_

18b Plans to promote participant retention and complete follow-up, including list of any outcome data to be collected for participants who discontinue or deviate from intervention protocols \_\_ 19-20\_\_

|    |                                 |     |                                                                                                                                                                                                                                                                                                                                       |         |
|----|---------------------------------|-----|---------------------------------------------------------------------------------------------------------------------------------------------------------------------------------------------------------------------------------------------------------------------------------------------------------------------------------------|---------|
| 1  |                                 |     |                                                                                                                                                                                                                                                                                                                                       |         |
| 2  |                                 |     |                                                                                                                                                                                                                                                                                                                                       |         |
| 3  | Data management                 | 19  | Plans for data entry, coding, security, and storage, including any related processes to promote data quality (eg, double data entry; range checks for data values). Reference to where details of data management procedures can be found, if not in the protocol                                                                     | __21__  |
| 4  |                                 |     |                                                                                                                                                                                                                                                                                                                                       |         |
| 5  |                                 |     |                                                                                                                                                                                                                                                                                                                                       |         |
| 6  |                                 |     |                                                                                                                                                                                                                                                                                                                                       |         |
| 7  | Statistical methods             | 20a | Statistical methods for analysing primary and secondary outcomes. Reference to where other details of the statistical analysis plan can be found, if not in the protocol                                                                                                                                                              | __20__  |
| 8  |                                 |     |                                                                                                                                                                                                                                                                                                                                       |         |
| 9  |                                 |     |                                                                                                                                                                                                                                                                                                                                       |         |
| 10 |                                 | 20b | Methods for any additional analyses (eg, subgroup and adjusted analyses)                                                                                                                                                                                                                                                              | __20__  |
| 11 |                                 |     |                                                                                                                                                                                                                                                                                                                                       |         |
| 12 |                                 | 20c | Definition of analysis population relating to protocol non-adherence (eg, as randomised analysis), and any statistical methods to handle missing data (eg, multiple imputation)                                                                                                                                                       | __20__  |
| 13 |                                 |     |                                                                                                                                                                                                                                                                                                                                       |         |
| 14 |                                 |     |                                                                                                                                                                                                                                                                                                                                       |         |
| 15 |                                 |     |                                                                                                                                                                                                                                                                                                                                       |         |
| 16 | <b>Methods: Monitoring</b>      |     |                                                                                                                                                                                                                                                                                                                                       |         |
| 17 |                                 |     |                                                                                                                                                                                                                                                                                                                                       |         |
| 18 | Data monitoring                 | 21a | Composition of data monitoring committee (DMC); summary of its role and reporting structure; statement of whether it is independent from the sponsor and competing interests; and reference to where further details about its charter can be found, if not in the protocol. Alternatively, an explanation of why a DMC is not needed | __21__  |
| 19 |                                 |     |                                                                                                                                                                                                                                                                                                                                       |         |
| 20 |                                 |     |                                                                                                                                                                                                                                                                                                                                       |         |
| 21 |                                 |     |                                                                                                                                                                                                                                                                                                                                       |         |
| 22 |                                 |     |                                                                                                                                                                                                                                                                                                                                       |         |
| 23 |                                 | 21b | Description of any interim analyses and stopping guidelines, including who will have access to these interim results and make the final decision to terminate the trial                                                                                                                                                               | __n/a__ |
| 24 |                                 |     |                                                                                                                                                                                                                                                                                                                                       |         |
| 25 |                                 |     |                                                                                                                                                                                                                                                                                                                                       |         |
| 26 | Harms                           | 22  | Plans for collecting, assessing, reporting, and managing solicited and spontaneously reported adverse events and other unintended effects of trial interventions or trial conduct                                                                                                                                                     | __n/a__ |
| 27 |                                 |     |                                                                                                                                                                                                                                                                                                                                       |         |
| 28 |                                 |     |                                                                                                                                                                                                                                                                                                                                       |         |
| 29 | Auditing                        | 23  | Frequency and procedures for auditing trial conduct, if any, and whether the process will be independent from investigators and the sponsor                                                                                                                                                                                           | __n/a__ |
| 30 |                                 |     |                                                                                                                                                                                                                                                                                                                                       |         |
| 31 |                                 |     |                                                                                                                                                                                                                                                                                                                                       |         |
| 32 |                                 |     |                                                                                                                                                                                                                                                                                                                                       |         |
| 33 | <b>Ethics and dissemination</b> |     |                                                                                                                                                                                                                                                                                                                                       |         |
| 34 |                                 |     |                                                                                                                                                                                                                                                                                                                                       |         |
| 35 | Research ethics approval        | 24  | Plans for seeking research ethics committee/institutional review board (REC/IRB) approval                                                                                                                                                                                                                                             | __22__  |
| 36 |                                 |     |                                                                                                                                                                                                                                                                                                                                       |         |
| 37 |                                 |     |                                                                                                                                                                                                                                                                                                                                       |         |
| 38 | Protocol amendments             | 25  | Plans for communicating important protocol modifications (eg, changes to eligibility criteria, outcomes, analyses) to relevant parties (eg, investigators, REC/IRBs, trial participants, trial registries, journals, regulators)                                                                                                      | __n/a__ |
| 39 |                                 |     |                                                                                                                                                                                                                                                                                                                                       |         |
| 40 |                                 |     |                                                                                                                                                                                                                                                                                                                                       |         |
| 41 |                                 |     |                                                                                                                                                                                                                                                                                                                                       |         |
| 42 |                                 |     |                                                                                                                                                                                                                                                                                                                                       |         |
| 43 |                                 |     |                                                                                                                                                                                                                                                                                                                                       |         |
| 44 |                                 |     |                                                                                                                                                                                                                                                                                                                                       |         |
| 45 |                                 |     |                                                                                                                                                                                                                                                                                                                                       |         |
| 46 |                                 |     |                                                                                                                                                                                                                                                                                                                                       |         |
| 47 |                                 |     |                                                                                                                                                                                                                                                                                                                                       |         |
| 48 |                                 |     |                                                                                                                                                                                                                                                                                                                                       |         |
| 49 |                                 |     |                                                                                                                                                                                                                                                                                                                                       |         |

|    |                               |     |                                                                                                                                                                                                                                                                                     |                             |
|----|-------------------------------|-----|-------------------------------------------------------------------------------------------------------------------------------------------------------------------------------------------------------------------------------------------------------------------------------------|-----------------------------|
| 1  |                               |     |                                                                                                                                                                                                                                                                                     |                             |
| 2  |                               |     |                                                                                                                                                                                                                                                                                     |                             |
| 3  | Consent or assent             | 26a | Who will obtain informed consent or assent from potential trial participants or authorised surrogates, and how (see Item 32)                                                                                                                                                        | <u>22</u>                   |
| 4  |                               |     |                                                                                                                                                                                                                                                                                     |                             |
| 5  |                               |     |                                                                                                                                                                                                                                                                                     |                             |
| 6  |                               | 26b | Additional consent provisions for collection and use of participant data and biological specimens in ancillary studies, if applicable                                                                                                                                               | <u>n/a</u>                  |
| 7  |                               |     |                                                                                                                                                                                                                                                                                     |                             |
| 8  |                               |     |                                                                                                                                                                                                                                                                                     |                             |
| 9  | Confidentiality               | 27  | How personal information about potential and enrolled participants will be collected, shared, and maintained in order to protect confidentiality before, during, and after the trial                                                                                                | <u>22</u>                   |
| 10 |                               |     |                                                                                                                                                                                                                                                                                     |                             |
| 11 |                               |     |                                                                                                                                                                                                                                                                                     |                             |
| 12 | Declaration of interests      | 28  | Financial and other competing interests for principal investigators for the overall trial and each study site                                                                                                                                                                       | <u>26</u>                   |
| 13 |                               |     |                                                                                                                                                                                                                                                                                     |                             |
| 14 |                               |     |                                                                                                                                                                                                                                                                                     |                             |
| 15 | Access to data                | 29  | Statement of who will have access to the final trial dataset, and disclosure of contractual agreements that limit such access for investigators                                                                                                                                     | <u>26</u>                   |
| 16 |                               |     |                                                                                                                                                                                                                                                                                     |                             |
| 17 |                               |     |                                                                                                                                                                                                                                                                                     |                             |
| 18 | Ancillary and post-trial care | 30  | Provisions, if any, for ancillary and post-trial care, and for compensation to those who suffer harm from trial participation                                                                                                                                                       | <u>n/a</u>                  |
| 19 |                               |     |                                                                                                                                                                                                                                                                                     |                             |
| 20 |                               |     |                                                                                                                                                                                                                                                                                     |                             |
| 21 | Dissemination policy          | 31a | Plans for investigators and sponsor to communicate trial results to participants, healthcare professionals, the public, and other relevant groups (eg, via publication, reporting in results databases, or other data sharing arrangements), including any publication restrictions | <u>22</u>                   |
| 22 |                               |     |                                                                                                                                                                                                                                                                                     |                             |
| 23 |                               |     |                                                                                                                                                                                                                                                                                     |                             |
| 24 |                               |     |                                                                                                                                                                                                                                                                                     |                             |
| 25 |                               |     |                                                                                                                                                                                                                                                                                     |                             |
| 26 |                               | 31b | Authorship eligibility guidelines and any intended use of professional writers                                                                                                                                                                                                      | <u>n/a</u>                  |
| 27 |                               |     |                                                                                                                                                                                                                                                                                     |                             |
| 28 |                               | 31c | Plans, if any, for granting public access to the full protocol, participant-level dataset, and statistical code                                                                                                                                                                     | <u>26</u>                   |
| 29 |                               |     |                                                                                                                                                                                                                                                                                     |                             |
| 30 | <b>Appendices</b>             |     |                                                                                                                                                                                                                                                                                     |                             |
| 31 |                               |     |                                                                                                                                                                                                                                                                                     |                             |
| 32 | Informed consent materials    | 32  | Model consent form and other related documentation given to participants and authorised surrogates                                                                                                                                                                                  | <u>supplementary file 2</u> |
| 33 |                               |     |                                                                                                                                                                                                                                                                                     |                             |
| 34 |                               |     |                                                                                                                                                                                                                                                                                     |                             |
| 35 | Biological specimens          | 33  | Plans for collection, laboratory evaluation, and storage of biological specimens for genetic or molecular analysis in the current trial and for future use in ancillary studies, if applicable                                                                                      | <u>n/a</u>                  |
| 36 |                               |     |                                                                                                                                                                                                                                                                                     |                             |
| 37 |                               |     |                                                                                                                                                                                                                                                                                     |                             |

38 \*It is strongly recommended that this checklist be read in conjunction with the SPIRIT 2013 Explanation & Elaboration for important clarification on the items.  
 39 Amendments to the protocol should be tracked and dated. The SPIRIT checklist is copyrighted by the SPIRIT Group under the Creative Commons  
 40 "[Attribution-NonCommercial-NoDerivs 3.0 Unported](https://creativecommons.org/licenses/by-nc-nd/3.0/)" license.  
 41

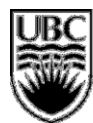

a place of mind  
THE UNIVERSITY OF BRITISH COLUMBIA

## Consent Form

### **Title: HAT TRICK: Examining the feasibility of a gender-sensitive intervention focused on physical activity, healthy eating and connectedness in male hockey fans**

#### **Lead Investigators:**

Dr. Cristina Caperchione, School of Health and Exercise Sciences, University of British Columbia, Kelowna 250 807 9679

#### **Co-Investigators:**

Dr. Joan Bottorff, Inst. For Healthy Living and Chronic Disease Prevention, University of British Columbia, Kelowna 250 807 8627

Dr. John Oliffe, School of Nursing, University of British Columbia, Vancouver 604 822-7638

Dr. Steven Johnson, Centre for Nursing and Health Studies, Athabasca University, Athabasca 877 848-6903

Dr. Kate Hunt, School of Public Health Sciences Unit, University of Glasgow, Glasgow 0 141 353-7552

Paul Sharp, School of Health and Exercise Sciences, University of British Columbia, Kelowna 250-807-9979

#### **Funding**

This study is funded by the Canadian Cancer Society Research Institute.

#### **Purpose of the study**

The purpose of this research is to evaluate the feasibility of the HAT TRICK Program, a program targeting physical activity, healthy eating and connectedness in men living in Kelowna, BC. The intervention will be delivered in connection with the Kelowna Rockets Hockey team.

#### **Eligibility**

You are being invited to voluntarily take part in this study because you are a man over the age of 35 years, residing in the Okanagan Region, who accumulates less than 150 minutes of moderate to vigorous physical activity a week, who has a Body Mass Index (BMI) greater than 25kg/m<sup>2</sup>, and a pant size greater than 38”.

#### **Study Procedures**

As a participant of this research project you will be invited to participate in twelve 90-minute weekly sessions, provide feedback on aspects of the program, and complete three assessment periods (baseline, 12-week, and 9-month follow-up). Weekly sessions will include a physical activity component, nutrition component, and behavior change component. Participants will be encouraged to make gradual changes to their lifestyle with the goal of improving overall health and well-being. Throughout the program, presentations will be given from local health professionals (e.g., nutritionist, fitness trainer), Kelowna Rockets staff and players, as well as other community personalities.



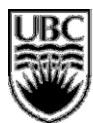

a place of mind  
THE UNIVERSITY OF BRITISH COLUMBIA

1  
2  
3  
4  
5 Assessment sessions will be held at a convenient location. These assessment periods will last up to 1.5  
6 hours. At these assessment periods, you will be asked to complete a brief questionnaires about your;  
7 physical activity and dietary behaviours, social relatedness, general health and well-being questions as  
8 well as general demographic information (e.g., age, education, marital status). During these times you  
9 will also be given an accelerometer and instructions on how to use the accelerometer. Accelerometers  
10 are a device for measuring your daily physical activity. It is a small, non-invasive device which is worn  
11 around your chest. You will be asked to wear this accelerometer for 7 consecutive days during all  
12 waking hours. You will also be asked to return the accelerometers to the research team after these 7  
13 days. Return instructions will be provided to you when you receive your accelerometer.  
14  
15  
16

17 Following the completion of the program you may also be asked commit an additional 1 hour of your  
18 time to participate in a semi-structured telephone interview with a member of the research team. If you  
19 are selected, a member of the research team will contact you to arrange a time that is convenient for you  
20 to conduct the interview. All telephone interviews will be audio recorded with your consent. During this  
21 interview we hope to hear about your thoughts, opinions and perceptions about the HAT TRICK  
22 Program and provide general comments about how you think the HAT TRICK Program could be  
23 improved.  
24  
25  
26

### **Potential Risks and Benefits**

27 The HAT TRICK program and data collection procedures involve no foreseeable risks or harm to you.  
28 However, you will be asked to work towards meeting the minimum recommended Canadian Physical  
29 Activity Guidelines (150minutes per week in bouts of 10 minutes or more) and depending on your initial  
30 activity levels, you will be encouraged to safely increase your physical activity levels throughout the  
31 project. Becoming physically active and progressively increasing your physical activity may potentially  
32 include some risk of injury, such as common muscle soreness or strains associated with being physically  
33 active. To limit any concerns you may have regarding these minor injuries, information about reducing  
34 this risk of injury, such as education about stretching and starting off slowly and building up your  
35 physical activity levels will be provided during the weekly sessions. Although no benefits can be  
36 guaranteed, potential benefits that may occur include; improvements in overall physical and mental  
37 health as a result of increasing your physical activity levels, improved understandings about the benefits  
38 of physical activity and other healthy lifestyle behaviours (i.e., healthy eating, stress management),  
39 increased social interaction and support.  
40  
41  
42  
43

### **Confidentiality**

44 Your confidentiality will be respected at all times. Only research team members and research staff will  
45 have access to data collected in this study. All documents will only be identified by a code number and  
46 kept in a locked filing cabinet and/or secure password protected system. Participants will not be  
47 identified by name in any reports or materials associated with this research. Paper copies and electronic  
48 audio files will be kept for 7 years in the Physical Health and Activity Behaviour Laboratory at UBC  
49 Okanagan. All participants taking part in the sessions will sign the confidentiality agreement at the  
50 bottom of this consent form; however, we cannot control what the other participants do with the  
51 information discussed. Findings from the study may be shared through conference presentations, articles  
52 for publication, and other media outlets. An electronic or print copy of the research report will be  
53 available to you on request.  
54  
55  
56  
57  
58  
59

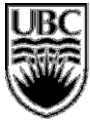

a place of mind  
THE UNIVERSITY OF BRITISH COLUMBIA

### **Contact for information about the study**

If you have any questions or would like additional information, please contact Dr. Cristina Caperchione at 250-807-9679.

### **Contact for concerns about the rights of research participants**

If you have any concerns about your treatment or rights as a research participant and/or your experiences while participating in this study you may contact the Research Participant Complaint Line in the UBC Office of Research Services at 1-877-822-8598 or the UBC Okanagan Research Services Office at 250-807-8832. It is also possible to contact the Research Participant Complaint Line by email ([RSIL@ors.ubc.ca](mailto:RSIL@ors.ubc.ca)).

### **Consent**

Your participation is entirely voluntary. You may refuse to participate or withdraw at any time without penalty or consequence. If you choose to participate and then decide to withdraw at a later time, you have the right to request the withdrawal of your information collected during the study. This request will be respected to the extent possible.

By signing this consent form, you are agreeing to participate in all study protocols. By signing this consent form you are acknowledging that you have received a signed copy of the consent form for your records. By signing this consent form, you do not waive any of your legal rights.

### **Consent**

I have read and understood the information on this consent form and voluntarily consent to participate in this study. I have had a chance to ask questions about the study and my involvement in it and have received a copy of the consent form.

\_\_\_\_\_  
Participant's Name (please print)

\_\_\_\_\_  
Participant's Signature

\_\_\_\_\_  
Date

### **Confidentiality Agreement**

I agree to respect the confidentiality of all program participants. This means I will not discuss participants' personal information with anyone outside of this program.

\_\_\_\_\_  
Participant's Name (please print)

\_\_\_\_\_  
Participant's Signature

\_\_\_\_\_  
Date

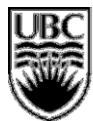

a place of mind  
THE UNIVERSITY OF BRITISH COLUMBIA

### Contact for a Follow-up Interview

Upon completion of the program, would you be interested in taking part in a 1-hour semi-structured telephone interview with a member of the research team regarding your thoughts, opinions, and perceptions of the HAT TRICK Program?

Yes, I would be interested in taking part in a telephone interview.

No, I would not be interested in taking part in a telephone interview.

\_\_\_\_\_  
Participant's Name (please print)

\_\_\_\_\_  
Participant's Signature

\_\_\_\_\_  
Date

\_\_\_\_\_  
Telephone Number

\_\_\_\_\_  
Email Address

### Contact for Future Studies

Would you like to be contacted in the future about other studies?

Yes, I would like to receive information about future studies on men's health and physical activity.

No, I would not like to receive information about future studies.

\_\_\_\_\_  
Participant's Name (please print)

\_\_\_\_\_  
Participant's Signature

\_\_\_\_\_  
Date
